# Supplementary material for: Tetradentate Pt[O^N^C^N] complexes with peripheral diarylamino substituents for high-performance and stable green organic light-emitting diodes with LT95 of 17 140 h at 1000 cd m−2
Source: Royal Society of Chemistry journal article supplement (doi:10.1039/d4tc00614c), 2024-01-01
Supplement: d4tc00614c1.pdf [file d4tc00614c1.pdf]

## Supporting Information

**Tetradentate Pt[O<sup>N</sup>C<sup>N</sup>] Complexes with Peripheral Diarylamino Substituents for High-Performance and Stable Green Organic Light-Emitting Diodes with LT<sub>95</sub> of 17140 h at 1000 cd m<sup>-2</sup>**

*Huiyang Li, Yuanhai Yi, Xiaofeng Tan, Lei Dai, Faan-Fung Hung, Gang Cheng, Kaixin Tan, Ziyong Chen, Jun Yang, Pengcheng Zhou, \*Xugang Shu\* and Chi-Ming Che\**

## Experimental section

### Materials and Instrumentation

All commercially available chemicals were used as received. Compounds **ONC-Br** and **H-ONC-B** were synthesized according to literature procedures.<sup>[S1]</sup> <sup>1</sup>H and <sup>13</sup>C NMR spectroscopic study was conducted with a Bruker Avance 400, DRX-500 or Avance 600 FT-NMR spectrometer using tetramethylsilane (TMS;  $\delta = 0$  ppm) as internal standard. HRMS (ESI) spectra were measured on a Bruker Q-ToF Maxis II mass spectrometer. UV-visible absorption spectra were obtained using a Hewlett-Packard 8453 A diode array spectrophotometer. Electrochemical cyclic voltammetry was performed with a Princeton Applied Research Model 273A potentiostat/galvanostat coulometer with a three-electrode cell system using glassy carbon as working electrode, platinum wire as counter electrode, SCE as reference electrode. The ferrocene/ferrocenium redox couple was used for potential calibration. Elemental analyses were conducted at the Institute of Chemistry of the Chinese Academy of Sciences, Beijing. Emission spectra of complexes in solutions and films were recorded on a Horiba Fluorolog-3 spectrophotometer. Solutions for photophysical studies were degassed by five freeze-pump-thaw cycles using a high vacuum line prior to measurement. The thin films of the complex doped in mCP were prepared by vapor-deposition under vacuum. Photoluminescence quantum yields of the Pt complexes in solutions and films were measured with Hamamatsu C11347 Quantaaurus-QY Absolute PL quantum yields measurement system. The radiative decay lifetime measurements were performed on a Hamamatsu C16361 Compact Fluorescence Lifetime Spectrometer. Nanosecond time-resolved emission (TRE) and nanosecond transient absorption (ns-TA) measurements were performed on a LP920-KS laser flash photolysis spectrophotometer (Edinburgh Instruments Ltd). The excitation source was a Q-switched Nd:YAG laser system and the laser excitation wavelength ( $\lambda_{ex}$ ) used was 355 nm. Solution samples were prepared in the same way as for the steady-state photophysical measurements. Data were processed with a PC plugin controlled by the software L900. Femtosecond time-resolved absorption (fs-TA) spectra were recorded by an Ultrafast Systems HELIOS transient absorption spectrometer. The samples were excited by a 400 nm pump beam (the second harmonic of the fundamental 800 nm generated from a Ti:sapphire regenerative amplifier laser system) in a 2 mm path-length cuvette with magnetic stirring, and were probed by a white light continuum pulse generated from a sapphire pumped by the 800 nm laser. The temporal delay of probe to pump pulse was varied by a computer controlled optical delay line. The fs-TA signals were collected by a monochromator and detected with an air-cooled CCD detector.

## Synthesis

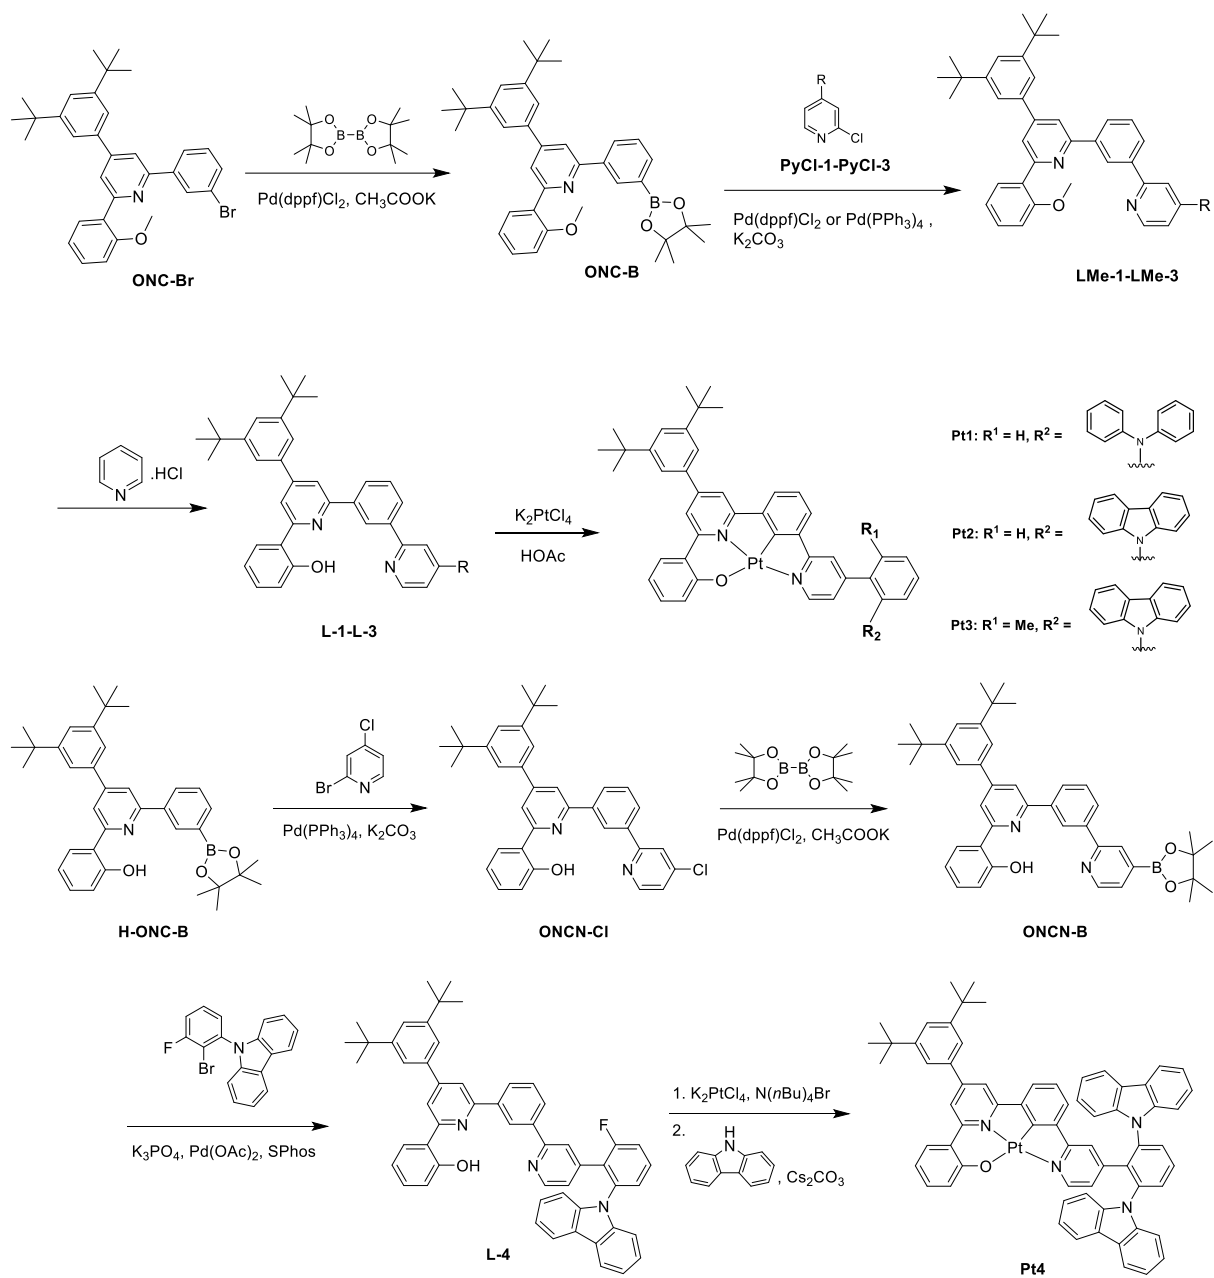

Scheme S1. Synthetic route of complexes **Pt1–Pt4**.

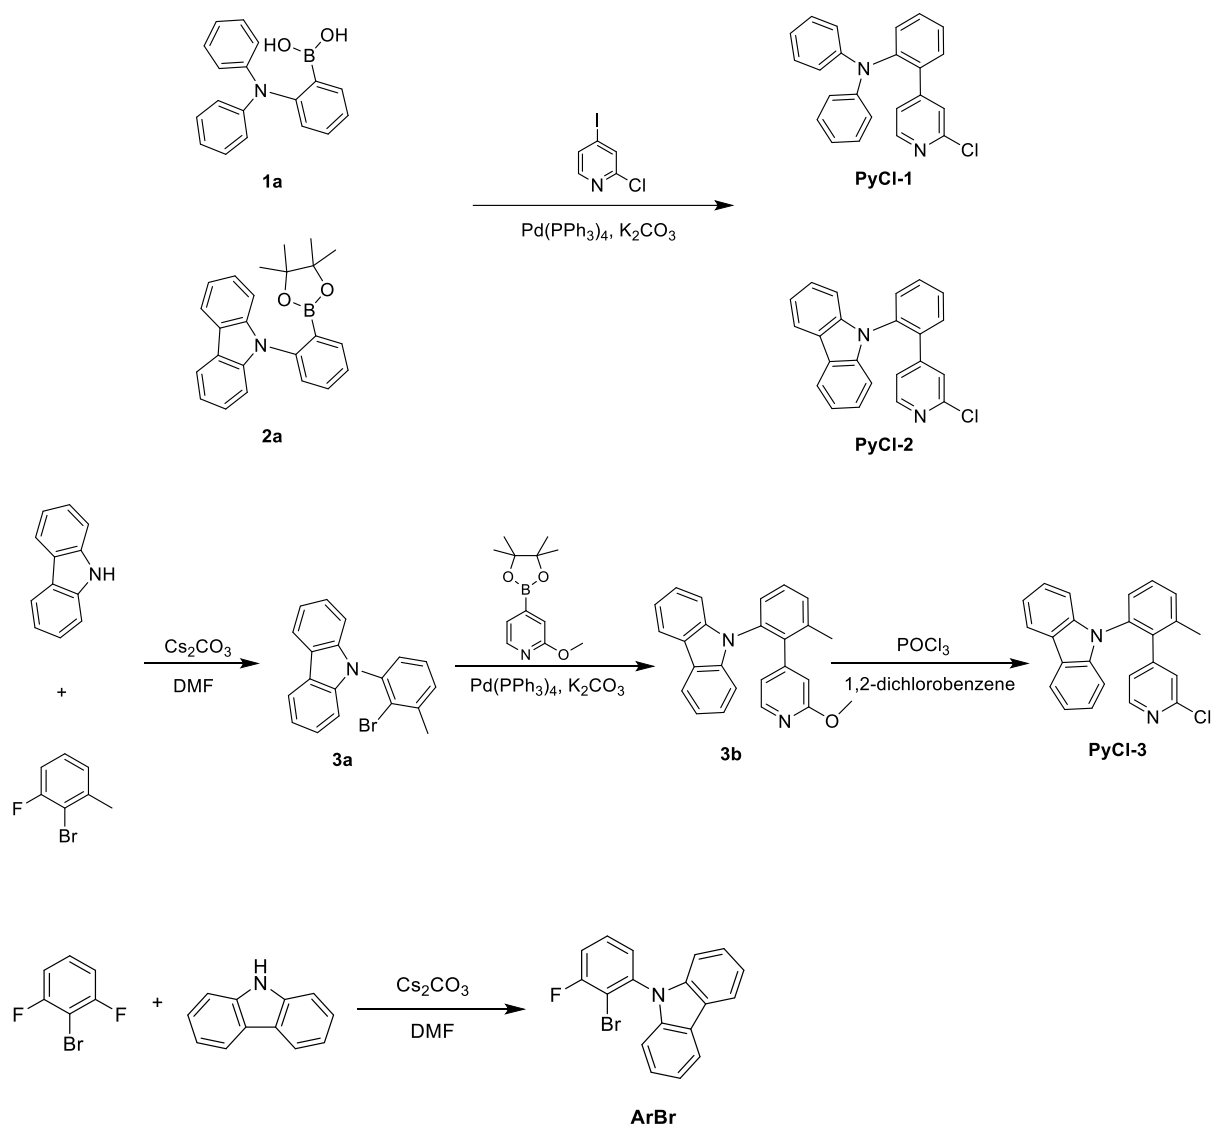

Scheme S2. Synthesis of the substituted pyridyl chlorides and substituted aryl bromide.

**Synthesis of 2-(2-chloropyridin-4-yl)-N,N-diphenylaniline (PyCl-1).** A mixture of **1a** (3.4 g, 11.8 mmol), 2-chloro-4-iodopyridine (4.3 g, 18.0 mmol), Pd(PPh<sub>3</sub>)<sub>4</sub> (1.3 g, 1.12 mmol), K<sub>2</sub>CO<sub>3</sub> (4.9 g, 35.5 mmol) in dioxane/H<sub>2</sub>O (100 mL/20 mL) was refluxed overnight under N<sub>2</sub> atmosphere. After cooling to room temperature, water (50 mL) was added and the mixture was extracted with dichloromethane (3 × 100 mL). The extracts were combined, washed with water and dried over anhydrous sodium sulfate. After the solvent was removed under reduced pressure, the residue was purified by chromatography on silica gel using hexane/ethyl acetate (v/v = 15/1) as eluent to give **PyCl-1** as a white solid (2.9 g, 69%). <sup>1</sup>H NMR (400 MHz, CDCl<sub>3</sub>, 25°C): δ/ppm = 8.11 (d, *J* = 5.1 Hz, 1H, ArH), 7.44-7.40 (m, 1H, ArH), 7.32 (d, *J* = 8.1 Hz, 1H, ArH), 7.28 (d, *J* = 4.0 Hz, 2H, ArH), 7.13-7.05 (m, 6H, ArH), 6.89-6.84 (m, 6H, ArH).

**Synthesis of 9-(2-(2-chloropyridin-4-yl)phenyl)-9H-carbazole (PyCl-2).** The procedure was similar to that of PyCl-1 except that **2a** (7.5 g, 20.3 mmol) was used instead of **1a**. Yield: 6.0 g (83%, white solid). <sup>1</sup>H-NMR (400 MHz, CDCl<sub>3</sub>, 25°C): δ/ppm = 8.05 (d, *J* = 8.0 Hz, 2H, ArH), 7.84 (d, *J* = 4.0 Hz, 1H, ArH), 7.65-7.62 (m, 3H, ArH), 7.55-7.53 (m, 1H, ArH), 7.29 (t, *J* = 8.0 Hz, 2H, ArH), 7.20 (t, *J* = 8.0 Hz, 2H, ArH), 7.08 (s, 1H, ArH), 7.00 (d, *J* = 8.0 Hz, 2H, ArH), 6.64 (d, *J* = 4.0 Hz, 1H, ArH). <sup>13</sup>CNMR (100 MHz, CDCl<sub>3</sub>, 25°C): δ/ppm = 151.4, 149.4, 149.2, 140.9, 137.0, 135.0, 131.0, 130.8, 130.3, 129.3, 126.0, 123.3, 123.0, 121.1, 120.4, 120.1, 109.5.

**Synthesis of 9-(2-bromo-3-methylphenyl)-9H-carbazole (3a).** A mixture of carbazole (3.3 g, 19.7 mmol), 2-bromo-1-fluoro-3-methylbenzene (7.6 g, 40.2 mmol), Cs<sub>2</sub>CO<sub>3</sub> (13.0 g, 39.9 mmol) and DMF (30 mL) was stirred at 150 °C under nitrogen for 12 h. After cooling to room temperature, water (100 mL) was added and the mixture was extracted with dichloromethane (3 × 100 mL). The extracts were combined, washed with water and dried over anhydrous sodium sulfate. After the solvent was removed under reduced pressure, the residue was purified by chromatography on silica gel using hexane/ethyl acetate (v/v = 30/1) as eluent to give **3a** as a white solid (3.3 g, 50%). <sup>1</sup>H NMR (400 MHz, CDCl<sub>3</sub>, 25°C): δ/ppm = 8.15 (d, *J* = 7.7 Hz, 2H), 7.42-7.37 (m, 4H), 7.32-7.24 (m, 3H), 7.05 (d, *J* = 8.1 Hz, 2H), 2.56 (s, 3H).

**Synthesis of 9-(2-(2-methoxypyridin-4-yl)-3-methylphenyl)-9H-carbazole (3b).** A mixture of **3a** (4.6 g, 13.7 mmol), 2-methoxy-4-(4,4,5,5-tetramethyl-1,3,2-dioxaborolan-2-yl)pyridine (6.5 g, 27.6 mmol), Pd(PPh<sub>3</sub>)<sub>4</sub> (1.6 g, 1.39 mmol), K<sub>2</sub>CO<sub>3</sub> (3.8 g, 27.4 mmol) in toluene/ethanol/H<sub>2</sub>O (25 mL/7.5 mL/10 mL) was refluxed overnight under N<sub>2</sub> atmosphere. After cooling to room temperature, water (50 mL) was added and the mixture was extracted with dichloromethane (3 × 50 mL). The extracts were combined, washed with water and dried over anhydrous sodium sulfate. After the solvent was removed under reduced pressure, the residue was purified by chromatography on silica gel using hexane/ethyl acetate (v/v = 20/1) as eluent to give **3b** as a white solid (3.2 g, 64%). <sup>1</sup>H NMR (400 MHz, CDCl<sub>3</sub>, 25°C): δ/ppm = 7.98 (d, *J* = 7.7 Hz, 2H), 7.69 (d, *J* = 5.1 Hz, 1H), 7.50-7.47 (m, 2H), 7.32-7.24 (m, 3H), 7.16 (t, *J* = 7.3 Hz, 2H), 7.05 (s,

br, 2H), 6.44 (d,  $J = 5.1$  Hz, 1H), 6.41 (s, 1H), 3.63 (s, 3H), 2.26 (s, 3H).

**Synthesis of 9-(2-(2-chloropyridin-4-yl)-3-methylphenyl)-9H-carbazole (PyCl-3).** A solution of **3b** (2.9 g, 8.0 mmol) in dichlorobenzene/ $\text{POCl}_3$  (45 mL / 10 mL) was stirred at 100 °C for 12 h. After cooling to room temperature, the mixture was slowly added to a solution of NaOH (1M, 50 mL) and stirred for 30 min. Then the mixture was extracted with ethyl acetate ( $3 \times 50$  mL), washed with water and dried over anhydrous sodium sulfate. After the solvent was removed under reduced pressure, the residue was purified by chromatography on silica gel using hexane/ethyl acetate (v/v = 30/1) as eluent to give **PyCl-3** as a white solid (2.1 g, 72%).  $^1\text{H}$  NMR (400 MHz,  $\text{CDCl}_3$ , 25°C):  $\delta/\text{ppm} = 7.99$  (d,  $J = 7.7$  Hz, 2H), 7.87 (d,  $J = 5.1$  Hz, 1H), 7.57-7.49 (m, 2H), 7.37-7.31 (m, 3H), 7.19 (t,  $J = 7.4$  Hz, 2H), 7.02-6.97 (m, 3H), 6.71 (d,  $J = 4.4$  Hz, 1H), 2.27 (s, 3H).

**Synthesis of 9-(2-bromo-3-fluorophenyl)-9H-carbazole (ArBr).** A mixture of 2-bromo-1,3-difluorobenzene (57.9 g, 300 mmol) and carbazole (16.7 g, 100 mmol) was dissolved in dimethylformamide (400 mL). The solution was stirred under r.t. for 5 mins and then cesium carbonate (65.2 g, 200 mmol) was added. The mixture was heated to reflux for 12 h and the solvent was vaporized under reduced pressure. The residue was suspended in water (500 mL) and extracted with dichloromethane ( $3 \times 200$  mL). The combined organic layer was washed with brine ( $2 \times 200$  mL) and vaporized under vacuum. The product was purified through a silica gel column (330 g, eluent: hexane/DCM (v/v) = 30/1 to 15/1) and collected as a white solid (31.1 g, isolated yield: 91%).  $^1\text{H}$  NMR (500 MHz,  $\text{CD}_2\text{Cl}_2$ , 25°C):  $\delta/\text{ppm} = 8.18$  (dt,  $J = 7.7, 1.0$  Hz, 2H), 7.56 (td,  $J = 8.2, 5.9$  Hz, 1H), 7.43 (ddd,  $J = 8.3, 7.2, 1.2$  Hz, 2H), 7.41 – 7.35 (m, 2H), 7.32 (td,  $J = 7.5, 1.0$  Hz, 2H), 7.10 (d,  $J = 0.9$  Hz, 1H), 7.08 (d,  $J = 0.9$  Hz, 1H).

**Synthesis of ONC-B.** A mixture of **ONC-Br** (5.28 g, 10.0 mmol), bis(pinacolato)diboron (1.2 equivalents) and potassium acetate (1.5 equivalents) in dioxane (50 mL) was stirred overnight at 90 °C under  $\text{N}_2$  atmosphere. After cooling to room temperature, the solution was poured into cold water and the resulting mixture was extracted with  $\text{CH}_2\text{Cl}_2$  ( $3 \times 50$  mL). The combined organic layers were washed with water and dried over anhydrous  $\text{MgSO}_4$ , and the volatiles were removed under reduced pressure. The crude product was then purified by recrystallization in methanol to give **ONC-B** as a white solid. Isolated yield: 80%;  $^1\text{H}$  NMR (400 MHz,  $\text{CDCl}_3$ , 25 °C):  $\delta/\text{ppm} = 8.4$  (s, 1H), 8.30 (d,  $J = 7.6$  Hz, 1H), 8.05 (d,  $J = 7.6$  Hz, 1H), 8.01 (s, 1H), 7.89-7.87 (m, 2H), 7.54-7.50 (m, 4H), 7.41 (t,  $J = 8.0$  Hz, 1H), 7.15 (t,  $J = 7.6$  Hz, 1H), 7.06 (d,  $J = 8.0$  Hz, 1H), 3.91 (s, 3H), 1.42 (s, 18H), 1.37 (s, 12H).

**Synthesis of LMe-1.** A mixture of **PyCl-1** (4.8 g, 13.5 mmol), **ONC-B** (9.3 g, 16.2 mmol),  $\text{Pd}(\text{PPh}_3)_4$  (1.5 g, 1.3 mmol),  $\text{K}_2\text{CO}_3$  (4.6 g, 33.3 mmol) in dioxane/ $\text{H}_2\text{O}$  (50 mL/10 mL) was refluxed overnight under  $\text{N}_2$  atmosphere. After cooling to room temperature, water (50 mL) was

added and the mixture was extracted with dichloromethane ( $3 \times 100$  mL). The extracts were combined, washed with water and dried over anhydrous sulfate. After the solvent was removed under reduced pressure, the residue was purified by chromatography on silica gel using hexane/ethyl acetate ( $v/v = 10/1$ ) as eluent to give **LMe-1** as a white solid (9.4 g, 91%).  $^1\text{H}$  NMR (400 MHz,  $\text{CDCl}_3$ ,  $25^\circ\text{C}$ ):  $\delta/\text{ppm} = 8.47\text{-}8.44$  (m, 2H, ArH), 8.18 (d,  $J = 7.7$  Hz, 1H, ArH), 8.06-8.04 (m, 2H, ArH), 7.85-7.81 (m, 2H, ArH), 7.54-7.51 (m, 5H, ArH), 7.43-7.29 (m, 5H, ArH), 7.16-7.12 (m, 2H, ArH), 7.07-7.01 (m, 5H, ArH), 6.86 (d,  $J = 8.1$  Hz, 4H, ArH), 6.77 (t,  $J = 7.2$  Hz, 2H, ArH), 3.91 (s, 3H, OMe), 1.41 (s, 18H, *t*-Bu).

**Synthesis of LMe-2.** The procedure was similar to that of **LMe-1** except that **PyCl-2** (4.5 g, 12.7 mmol) was used instead of **PyCl-1**. Yield: 7.8 g (80%, white solid).  $^1\text{H}$ -NMR (400MHz,  $\text{CDCl}_3$ ,  $25^\circ\text{C}$ ):  $\delta/\text{ppm} = 8.32$  (d,  $J = 4.0$  Hz, 1H, ArH), 8.19 (s, 1H, ArH), 8.08 (d,  $J = 8.0$  Hz, 1H, ArH), 8.04-8.02 (m, 2H, ArH), 7.94 (d,  $J = 8.0$  Hz, 2H, ArH), 7.76-7.73 (m, 2H, ArH), 7.67-7.64 (m, 2H, ArH), 7.59-7.55 (m, 4H, ArH), 7.42-7.36 (m, 2H, ArH), 7.34 (m, 1H, ArH), 7.27-7.22 (m, 3H, ArH), 7.15-7.09 (m, 3H, ArH), 7.05 (d,  $J = 8.0$  Hz, 3H, ArH), 6.91 (d,  $J = 8.0$  Hz, 1H, ArH), 3.91 (s, 3H, OCH<sub>3</sub>), 1.42 (s, 18H, *t*-Bu).  $^{13}\text{C}$ NMR (100MHz,  $\text{CDCl}_3$ ,  $25^\circ\text{C}$ ):  $\delta/\text{ppm} = 157.4$ , 157.3, 155.9, 151.5, 150.4, 149.4, 146.9, 141.2, 140.7, 139.4, 139.1, 138.9, 135.0, 131.7, 131.1, 130.4, 130.2, 129.9, 129.6, 129.3, 128.8, 128.0, 127.2, 126.0, 125.6, 123.1, 122.9, 122.5, 121.9, 121.1, 120.9, 120.4, 119.9, 119.7, 117.9, 111.7, 109.6, 55.9, 35.3, 31.8.

**Synthesis of LMe-3.** The procedure was similar to that of **LMe-1** except that **PyCl-3** (2.5 g, 6.8 mmol) was used instead of **PyCl-1**. Yield: 5.0 g (94%, white solid).  $^1\text{H}$  NMR (400 MHz,  $\text{CDCl}_3$ ,  $25^\circ\text{C}$ ):  $\delta/\text{ppm} = 8.26$  (d,  $J = 4.8$  Hz, 1H), 8.19 (s, 1H), 8.10- 8.04 (m, 3H), 7.89 (d,  $J = 7.3$  Hz, 2H), 7.78 (s, 1H), 7.54-7.51 (m, 5H), 7.43-7.38 (m, 3H), 7.31-7.26 (m, 3H), 7.19-7.04 (m, 7H), 6.86 (d,  $J = 4.0$  Hz, 1H), 3.91 (s, 3H), 2.32 (s, 3H), 1.42 (s, 18H).

**Synthesis of L-1.** A mixture of **LMe-1** (4.9 g, 6.4 mmol) and pyridine hydrochloride (50 g) was stirred at  $190^\circ\text{C}$  for 5 h under  $\text{N}_2$  atmosphere. After cooling to room temperature, water (100 mL) was added, and the mixture was extracted with dichloromethane ( $3 \times 100$  mL). The extracts were combined, washed with water and dried over anhydrous sulfate. After the solvent was removed under reduced pressure, the residue was purified by chromatography on silica gel using hexane/ethyl acetate ( $v/v = 8/1$ ) as eluent to give **Pt-1** as a light yellow solid (4.1 g, 85%).  $^1\text{H}$  NMR (400 MHz,  $\text{CDCl}_3$ ,  $25^\circ\text{C}$ ):  $\delta/\text{ppm} = 8.47$  (d,  $J = 4.8$  Hz, 1H, ArH), 8.36 (s, 1H, ArH), 8.03 (s, 2H, ArH), 7.95 (d,  $J = 7.3$  Hz, 1H, ArH), 7.87 (d,  $J = 8.1$  Hz, 1H, ArH), 7.83 (s, 1H, ArH), 7.61-7.58 (m, 3H, ArH), 7.53 (d,  $J = 1.1$  Hz, 2H, ArH), 7.45-7.31 (m, 5H, ArH), 7.13-6.96 (m, 7H, ArH), 6.87 (d,  $J = 7.7$  Hz, 4H, ArH), 6.76 (t,  $J = 7.3$  Hz, 2H, ArH), 1.43 (s, 18H, *t*-Bu).

**Synthesis of L-2.** The procedure was similar to that of **L-1** except that **LMe-2** (7.8 g, 10.2 mmol) was used instead of **LMe-1**. Yield: 6.4 g (84%, light yellow solid).  $^1\text{H}$ -NMR (400MHz,  $\text{CDCl}_3$ ,

25°C):  $\delta$ /ppm = 8.37 (d,  $J$  = 4.0 Hz, 1H, ArH), 8.05-8.04 (m, 2H, ArH), 7.97-7.93 (m, 4H, ArH), 7.78-7.76 (m, 1H, ArH), 7.73 (s, 1H, ArH), 7.69-7.67 (m, 2H, ArH), 7.62-7.58 (m, 2H, ArH), 7.54 (s, br, 2H, ArH), 7.43 (t,  $J$  = 6.0 Hz, 1H, ArH), 7.36 (t,  $J$  = 8.0 Hz, 1H, ArH), 7.31 (s, 1H, ArH), 7.29-7.23 (m, 3H, ArH), 7.13-7.07 (m, 5H, ArH), 7.00-6.96 (m, 2H, ArH), 1.45 (s, 18H, t-Bu).  $^{13}\text{C}$ NMR (100MHz,  $\text{CDCl}_3$ , 25°C):  $\delta$ /ppm = 160.2, 157.8, 156.6, 155.2, 152.9, 151.9, 149.6, 147.0, 141.2, 139.8, 138.9, 138.8, 138.5, 135.0, 131.5, 131.1, 130.4, 130.3, 129.3, 127.9, 127.6, 126.4, 126.0, 125.5, 123.6, 123.1, 121.8, 121.2, 120.3, 119.9, 119.7, 119.3, 118.8, 118.7, 118.4, 116.4, 109.7, 35.4, 31.8.

**Synthesis of L-3.** The procedure was similar to that of **L-1** except that **LMe-3** (5.0 g, 6.6 mmol) was used instead of **LMe-1**. Yield: 4.6 g (94%, white solid).  $^1\text{H}$  NMR (400 MHz,  $\text{CDCl}_3$ , 25°C):  $\delta$ /ppm = 8.28 (d,  $J$  = 5.1 Hz, 1H), 8.02 (d,  $J$  = 13.2 Hz, 2H), 7.96-7.91 (m, 2H), 7.87 (d,  $J$  = 7.7 Hz, 2H), 7.73 (s, 1H), 7.61 (s, 1H), 7.57-7.52 (m, 4H), 7.44-7.39 (m, 2H), 7.35 (t,  $J$  = 7.4 Hz, 1H), 7.26-7.16 (m, 5H), 7.08-6.95 (m, 5H), 6.92 (d,  $J$  = 4.4 Hz, 1H), 2.33 (s, 3H), 1.43 (s, 18H).

**Synthesis of ONCN-Cl.** A solution of **H-ONC-B** (30.9 g, 55 mmol), 2-bromo-4-chloropyridine (31.8 g, 165 mmol) and potassium carbonate (30.4 g, 220 mmol) in tetrahydrofuran (300 mL) and water (100 mL) was degassed under Argon bubbling for 20 mins. Then, tetrakis(triphenylphosphine)palladium(0) (1.27 g, 1.10 mmol) was added and the mixture was heated to reflux for 24 h. After cooling, the organic phase was separated, and the aqueous phase was extracted with dichloromethane (3  $\times$  50 mL). The combined organic phase was washed with brine (3  $\times$  200 mL) and dried over sodium sulphate. The product was purified through a silica gel column chromatography (eluent: hexane/ethyl acetate (v/v) = 20/1 to 6/1) and collected as yellow solid (26.7 g, yield: 89%).  $^1\text{H}$  NMR (400 MHz,  $\text{CDCl}_3$ , 25°C)  $\delta$ /ppm = 14.75 (s, 1H), 8.63 (dd,  $J$  = 5.3, 0.6 Hz, 1H), 8.57 (t,  $J$  = 1.8 Hz, 1H), 8.13 – 8.08 (m, 2H), 8.05 (d,  $J$  = 1.5 Hz, 1H), 7.95 (dd,  $J$  = 8.1, 1.6 Hz, 1H), 7.89 (d,  $J$  = 1.3 Hz, 1H), 7.84 (dd,  $J$  = 2.0, 0.6 Hz, 1H), 7.67 (t,  $J$  = 7.8 Hz, 1H), 7.61 (t,  $J$  = 1.8 Hz, 1H), 7.53 (d,  $J$  = 1.8 Hz, 2H), 7.36 (ddd,  $J$  = 8.6, 7.2, 1.6 Hz, 1H), 7.30 (dd,  $J$  = 5.3, 1.9 Hz, 1H), 7.09 (dd,  $J$  = 8.2, 1.2 Hz, 1H), 6.98 (ddd,  $J$  = 8.3, 7.2, 1.3 Hz, 1H), 1.43 (s, 18H).

**Synthesis of ONCN-B.** A suspension of **ONCN-Cl** (5.47 g, 10 mmol), bis(pinacolato)diboron (2.79 g, 11 mmol) and potassium acetate (2.94 g, 30 mmol) in anhydrous toluene (60 mL) was degassed under Argon bubbling for 20 mins. Then, [1,1'-bis(diphenylphosphino)ferrocene]dichloropalladium(II) (0.5 mmol, 366 mg) was added and the mixture was heated to reflux for 36 h. After cooling to room temperature, the mixture was filtered through celite and the filtrate was concentrated with silica gel. The product was purified through a silica gel column chromatography (eluent: hexane/ethyl acetate (v/v) = 5/1 to 1/1) and collected as brown solid (5.19 g, 81%).  $^1\text{H}$  NMR (400 MHz,  $\text{CDCl}_3$ , 25°C)  $\delta$ /ppm = 14.86 (s, 1H), 8.77 (dd,  $J$  = 4.6, 1.2 Hz, 1H), 8.61 (t,  $J$  = 1.9 Hz, 1H), 8.21 – 8.15 (m, 2H), 8.11 (ddd,  $J$  = 7.8, 2.0, 1.1 Hz,



1H), 8.06 (d,  $J = 1.4$  Hz, 1H), 7.97 (dd,  $J = 8.1, 1.5$  Hz, 1H), 7.94 (d,  $J = 1.4$  Hz, 1H), 7.66 (dd,  $J = 14.6, 6.8$  Hz, 1H), 7.63 – 7.60 (m, 2H), 7.56 (d,  $J = 1.8$  Hz, 2H), 7.37 (ddd,  $J = 8.5, 7.1, 1.5$  Hz, 1H), 7.09 (dd,  $J = 8.2, 1.3$  Hz, 1H), 6.98 (ddd,  $J = 8.3, 7.2, 1.2$  Hz, 1H), 1.44 (d,  $J = 1.4$  Hz, 18H), 1.39 (s, 12H).

**Synthesis of L-4.** A mixture of **ONCN-B** (6.55 g, 10 mmol), **ArBr** (4.08 g, 12 mmol), and potassium phosphate tribasic (6.37 g, 30 mmol) was dissolved in tetrahydrofuran (90 mL) and water (30 mL). The mixed solution was degassed under argon bubbling for 5 mins, then palladium acetate (45 mg, 0.2 mmol) and SPhos (205 mg, 0.5 mmol) were added. The mixture was heated to reflux for 24 h and cooled to r.t.. The aqueous layer was extracted with dichloromethane ( $3 \times 20$  mL) and the combined organic phase was washed with brine ( $3 \times 50$  mL). The mixed organic phase was dried over anhydrous magnesium sulphate and vaporized under vacuum. The product was purified through a silica gel column (330 g, eluent: hexane/EA (v/v) = 50/1 to 7/1) and collected as a yellow solid (6.9 g, isolated yield: 90%).  $^1\text{H}$  NMR (500 MHz,  $\text{CD}_2\text{Cl}_2$ , 25°C)  $\delta$ /ppm = 14.59 (s, 1H), 8.38 (dd,  $J = 5.0, 0.8$  Hz, 1H), 8.12 (d,  $J = 1.4$  Hz, 1H), 8.08 (t,  $J = 1.9$  Hz, 1H), 8.03 (dd,  $J = 8.1, 1.6$  Hz, 1H), 7.97 – 7.92 (m, 3H), 7.79 (d,  $J = 1.4$  Hz, 1H), 7.69 (td,  $J = 8.2, 6.0$  Hz, 1H), 7.65 (t,  $J = 1.8$  Hz, 1H), 7.60 (d,  $J = 1.8$  Hz, 2H), 7.51 – 7.42 (m, 3H), 7.36 (ddd,  $J = 8.5, 7.1, 1.6$  Hz, 1H), 7.32 (d,  $J = 1.6$  Hz, 1H), 7.27 (tdd,  $J = 8.5, 6.9, 1.4$  Hz, 3H), 7.17 – 7.10 (m, 4H), 7.08 (dt,  $J = 5.1, 1.7$  Hz, 1H), 7.04 (dd,  $J = 8.2, 1.3$  Hz, 1H), 6.99 (ddd,  $J = 8.3, 7.2, 1.3$  Hz, 1H), 1.45 (s, 18H).

**Synthesis of Pt1.** A mixture of **L-1** (1.0 g, 1.32 mmol),  $\text{K}_2\text{PtCl}_4$  (0.66 g, 1.59 mmol), tetrabutylammonium bromide (50 mg) and acetic acid (50 mL) was refluxed for 48 h under  $\text{N}_2$  atmosphere. After cooling to room temperature, water (50 mL) was added. Then the resulting mixture was filtered, and the solids were washed with methanol. The collected solids were purified by chromatography on silica gel using hexane/dichloromethane (v/v = 1/3) as eluent to give **Pt1** as an orange solid (0.70 g, 50%).  $^1\text{H}$  NMR (400 MHz,  $\text{CDCl}_3$ , 25°C):  $\delta$ /ppm = 8.79 (d,  $J = 5.8$  Hz, 1H), 8.32 (s, 1H), 8.11 (d,  $J = 7.9$  Hz, 1H), 7.78 (d,  $J = 1.4$  Hz, 1H), 7.64-7.59 (m, 5H), 7.50-7.44 (m, 2H), 7.43-7.34 (m, 4H), 7.28-7.26 (m, 1H), 7.20 (dd,  $J = 1.7, 5.8$  Hz, 1H), 7.16 (t,  $J = 7.6$  Hz, 1H), 7.12-7.08 (m, 4H), 6.91 (d,  $J = 7.9$  Hz, 4H), 6.84 (t,  $J = 7.2$  Hz, 2H), 6.75 (ddd,  $J = 1.8, 6.3, 8.3$  Hz, 1H), 1.44 (s, 18H).  $^{13}\text{C}$  NMR (101 MHz,  $\text{CDCl}_3$ , 25 °C):  $\delta$ /ppm = 167.45, 165.32, 164.93, 163.18, 152.67, 152.01, 150.56, 150.06, 149.33, 147.22, 145.21, 141.37, 140.97, 138.47, 136.06, 131.35, 131.27, 130.85, 129.90, 129.71, 129.16, 126.07, 125.44, 123.62, 123.35, 123.10, 122.35, 122.30, 121.94, 121.78, 121.65, 121.50, 119.18, 119.10, 114.87, 114.48, 35.17, 31.59. ESI-MS:  $m/z$  949.3435  $[\text{M}+\text{H}]^+$ . Anal. Calcd for  $\text{C}_{54}\text{H}_{47}\text{N}_3\text{OPT}$ : C, 68.34; H, 4.99; N, 4.43. Found: C, 68.11; H, 4.99; N, 4.44.

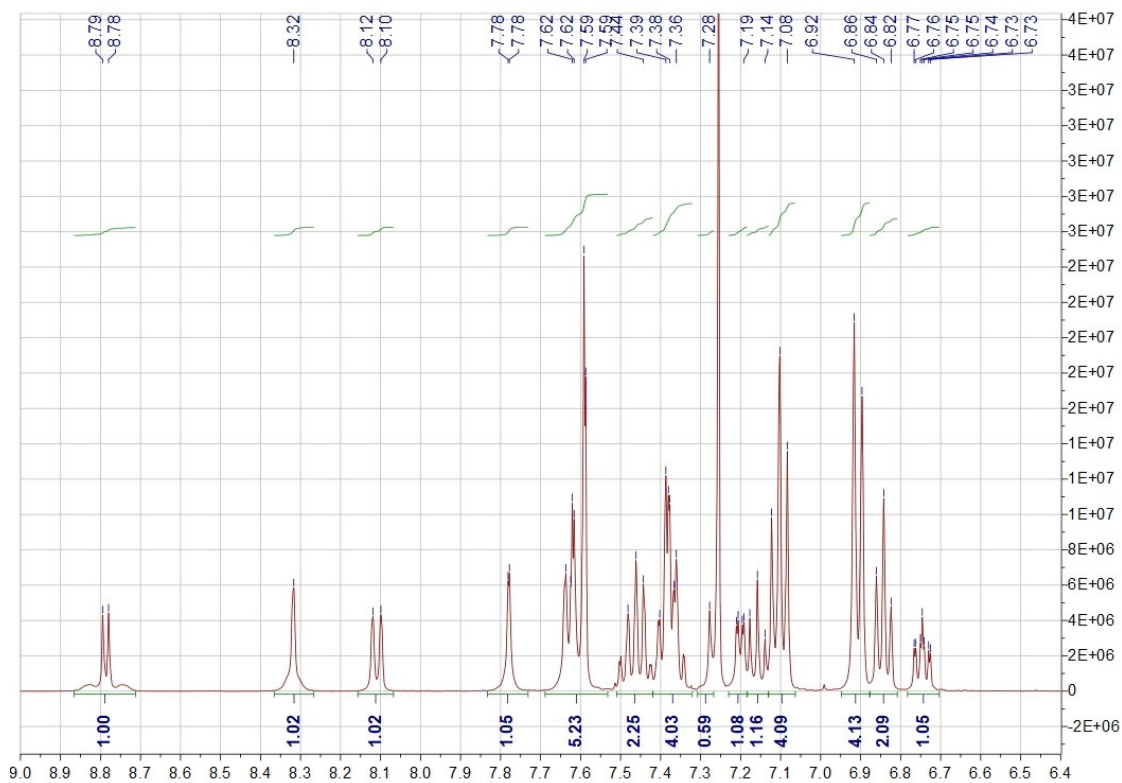

$^1\text{H}$  NMR spectrum (400 MHz) of **Pt1** in  $\text{CDCl}_3$  (aromatic region).

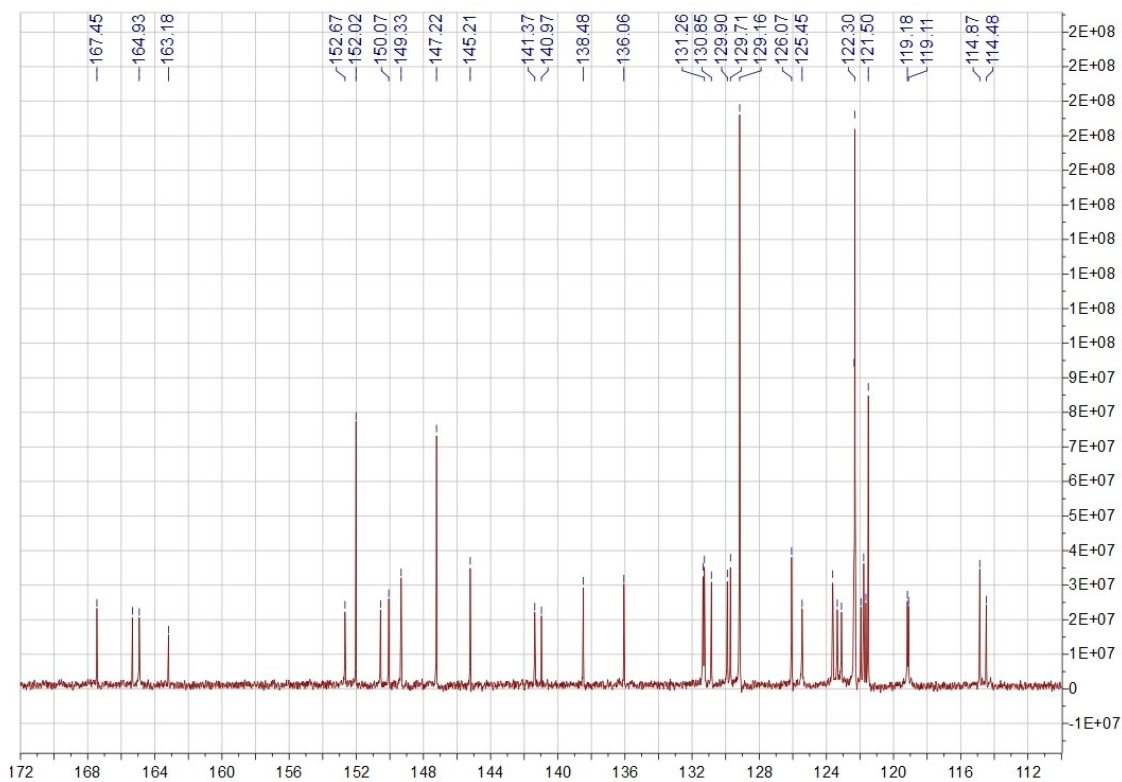

$^{13}\text{C}$  NMR spectrum (101 MHz) of **Pt1** in  $\text{CDCl}_3$  (aromatic region).

+ Scan (rt: 1.911-2.561 min) Sub (2)

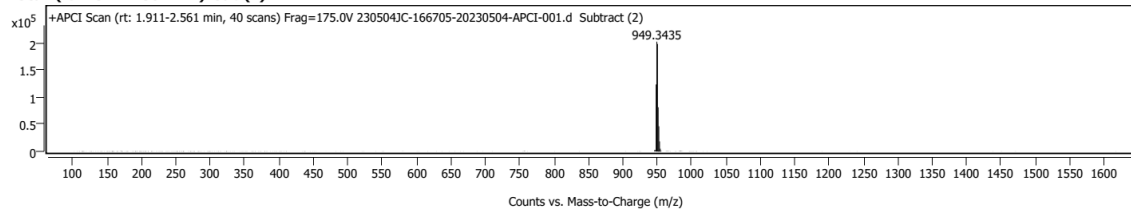

Spectrum Peaks

| m/z      | Z | Abund  | Abund % | m/z (Calc) | Diff (ppm) | Ion Species | Formula | Ion Type |
|----------|---|--------|---------|------------|------------|-------------|---------|----------|
| 946.3312 | 1 | 2688   | 1.34    |            |            |             |         |          |
| 947.3305 | 1 | 2095   | 1.04    |            |            |             |         |          |
| 948.3405 | 1 | 122873 | 61.03   |            |            |             |         |          |
| 949.3435 | 1 | 201344 | 100.00  |            |            |             |         |          |
| 950.3451 | 1 | 197218 | 97.95   |            |            |             |         |          |
| 951.3474 | 1 | 80995  | 40.23   |            |            |             |         |          |
| 952.3477 | 1 | 46094  | 22.89   |            |            |             |         |          |
| 953.3497 | 1 | 18312  | 9.10    |            |            |             |         |          |
| 954.3526 | 1 | 5003   | 2.49    |            |            |             |         |          |

HRMS results of **Pt1**.

**Synthesis of Pt2.** The procedure was similar to that of **Pt1** except that **L-2** (2.0 g, 2.6 mmol) was used instead of **L-1**. Yield: 1.5 g (60%, orange solid).  $^1\text{H-NMR}$  (400 MHz,  $\text{CDCl}_3$ ,  $25^\circ\text{C}$ ):  $\delta/\text{ppm}$  = 8.60 (d,  $J$  = 4.0 Hz, 1H, ArH), 8.25 (s, 1H, ArH), 8.04 (t,  $J$  = 8.0 Hz, 3H, ArH), 7.81-7.79 (m, 1H, ArH), 7.74-7.72 (m, 2H, ArH), 7.69 (s, 1H, ArH), 7.67-7.65 (m, 1H, ArH), 7.60 (s, 1H, ArH), 7.55 (s, 2H, ArH), 7.50 (d,  $J$  = 8.0 Hz, 1H, ArH), 7.38-7.28 (m, 4H, ArH), 7.25-7.18 (m, 3H, ArH), 7.08 (d,  $J$  = 8.0 Hz, 2H, ArH), 7.02 (t,  $J$  = 8.0 Hz, 1H, ArH), 6.96 (d,  $J$  = 4.0 Hz, 1H, ArH), 6.73-6.68 (m, 2H, ArH), 1.43 (s, 18H, *t*-Bu).  $^{13}\text{C NMR}$  (101 MHz,  $\text{CDCl}_3$ ,  $25^\circ\text{C}$ ):  $\delta/\text{ppm}$  = 167.73, 165.52, 164.87, 163.31, 152.60, 152.06, 150.08, 149.48, 149.01, 141.30, 140.57, 138.59, 137.80, 135.21, 131.36, 131.17, 130.80, 129.89, 129.61, 126.34, 125.54, 123.73, 123.40, 123.22, 121.75, 121.62, 121.17, 120.83, 120.37, 119.13, 118.17, 114.96, 114.47, 109.56, 35.52, 31.96. ESI-MS:  $m/z$  947.3278  $[\text{M}+\text{H}]^+$ . Anal. Calcd for  $\text{C}_{54}\text{H}_{45}\text{N}_3\text{OPt}$ : C, 68.48; H, 4.79; N, 4.44. Found: 67.93; H, 4.75; N, 4.92.

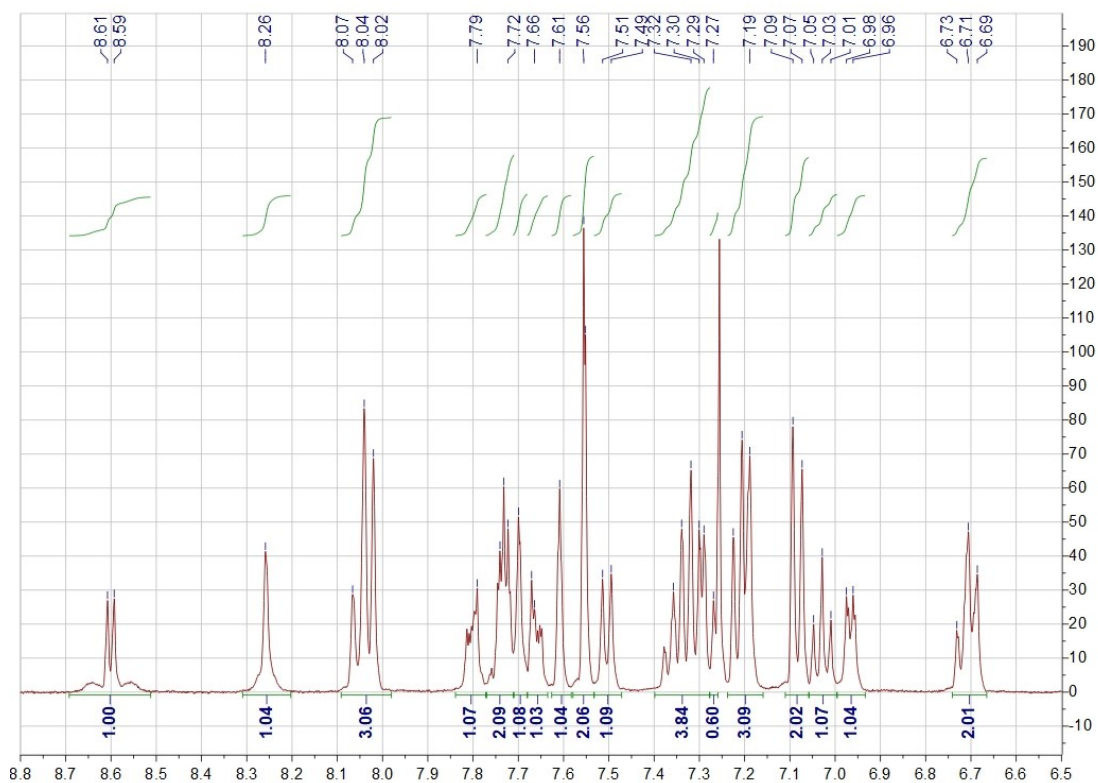

<sup>1</sup>H NMR spectrum (400 MHz) of **Pt2** in CDCl<sub>3</sub> (aromatic region).

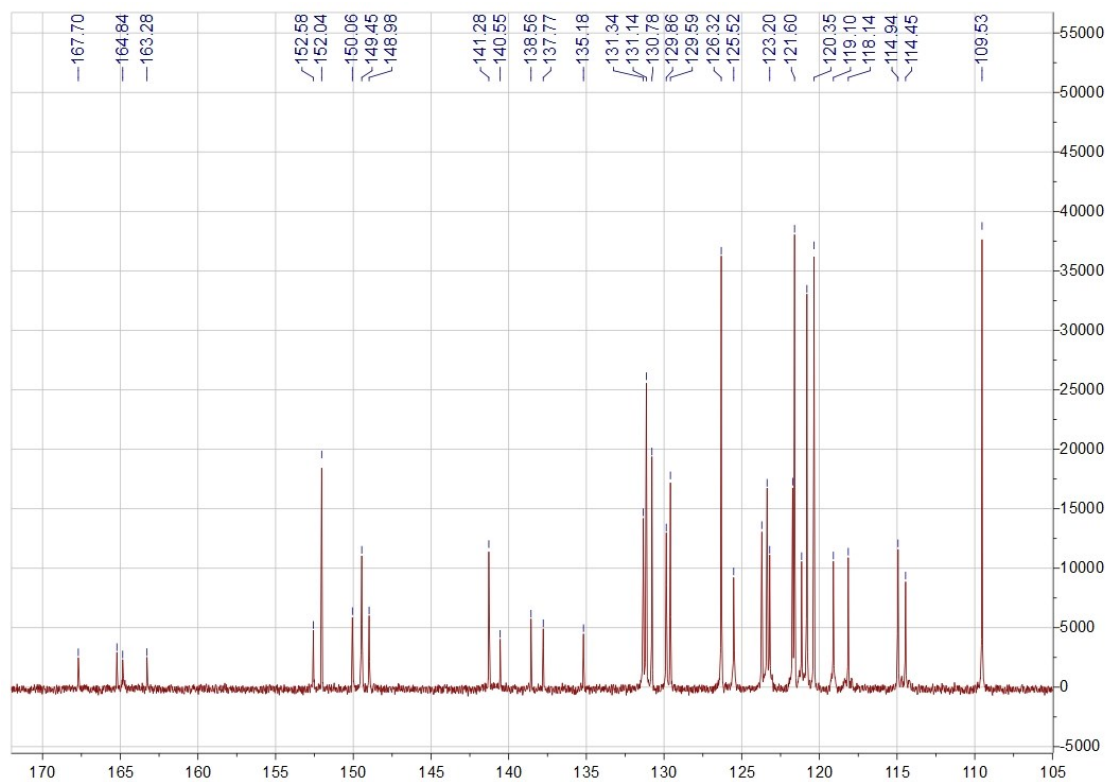

<sup>13</sup>C NMR spectrum (101 MHz) of **Pt2** in CDCl<sub>3</sub> (aromatic region).

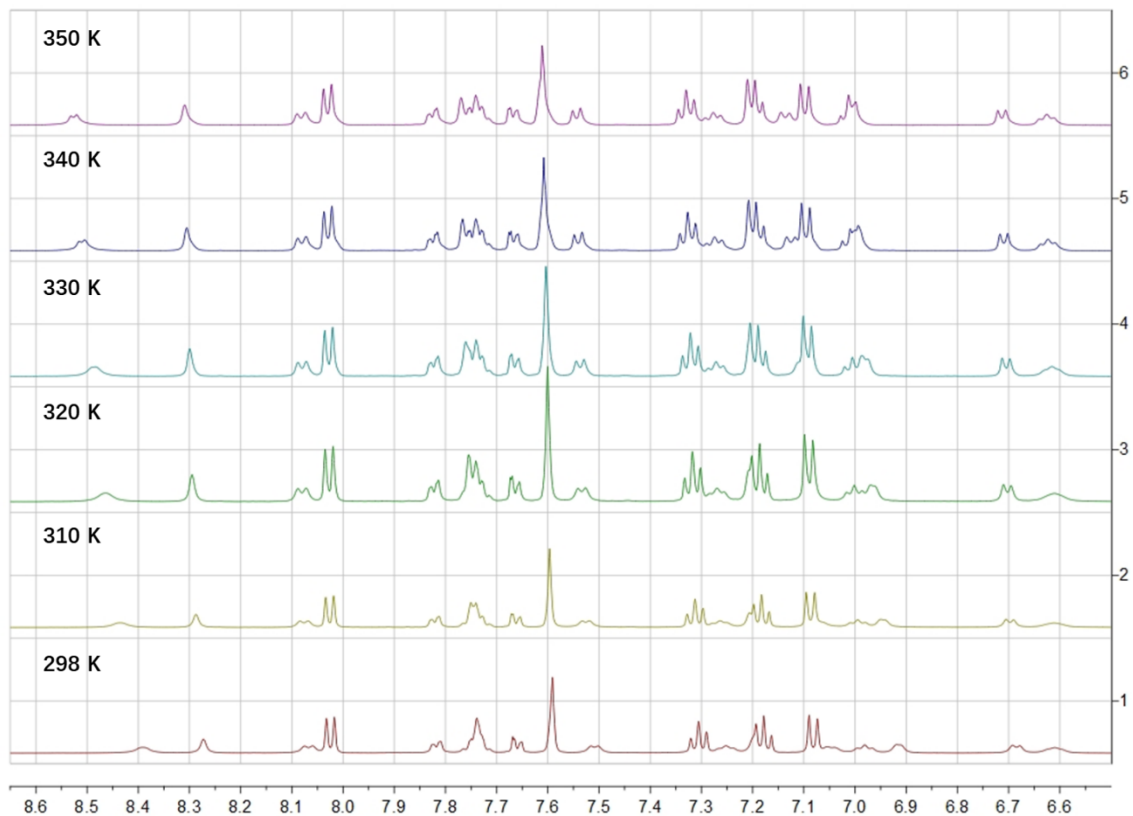

Variable temperature  $^1\text{H}$  NMR spectra recorded in 1,2-dichloroethane- $\text{D}_4$  from 298 to 350 K (heating).

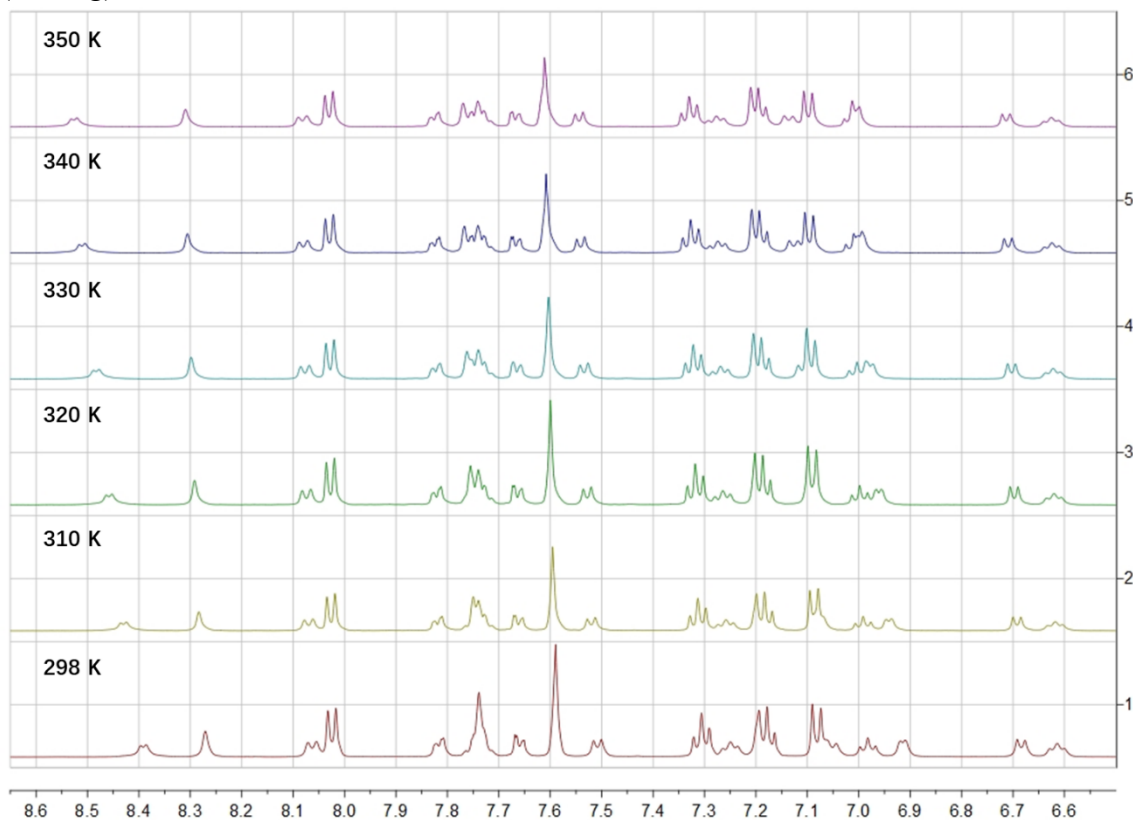

Variable temperature  $^1\text{H}$  NMR spectra recorded in 1,2-dichloroethane- $\text{D}_4$  from 350 to 298 K (cooling).

+ Scan (rt: 1.972-2.971 min) Sub (3)

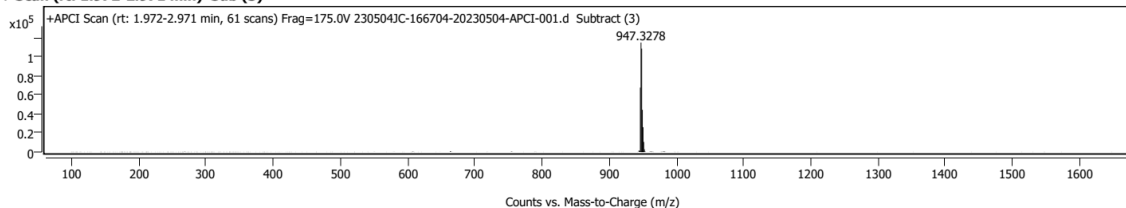

Spectrum Peaks

| m/z      | Z | Abund  | Abund % | m/z (Calc) | Diff (ppm) | Ion Species | Formula | Ion Type |
|----------|---|--------|---------|------------|------------|-------------|---------|----------|
| 944.3225 | 1 | 1574   | 1.37    |            |            |             |         |          |
| 946.3249 | 1 | 67694  | 58.83   |            |            |             |         |          |
| 947.3278 | 1 | 115060 | 100.00  |            |            |             |         |          |
| 948.3292 | 1 | 108638 | 94.42   |            |            |             |         |          |
| 949.3315 | 1 | 44313  | 38.51   |            |            |             |         |          |
| 950.3321 | 1 | 26038  | 22.63   |            |            |             |         |          |
| 951.3339 | 1 | 10563  | 9.18    |            |            |             |         |          |
| 952.3378 | 1 | 2847   | 2.47    |            |            |             |         |          |

HRMS results of **Pt2**.

**Synthesis of Pt3.** The procedure was similar to that of **Pt1** except that **L-3** (1.0 g, 1.3 mmol) was used instead of **L-1**. Yield: 0.74 g (59%, orange solid).  $^1\text{H}$  NMR (400 MHz,  $\text{CDCl}_3$ ,  $25^\circ\text{C}$ ):  $\delta/\text{ppm}$  = 8.65 (d,  $J$  = 5.9 Hz, 1H), 8.30 (d,  $J$  = 1.1 Hz, 1H), 8.08 (d,  $J$  = 7.4 Hz, 1H), 7.95 (d,  $J$  = 7.6 Hz, 2H), 7.74 (d,  $J$  = 1.5 Hz, 1H), 7.66-7.54 (m, 6H), 7.49 (d,  $J$  = 7.6 Hz, 1H), 7.42-7.32 (m, 4H), 7.23-7.19 (m, 4H), 7.10-6.98 (m, 3H), 6.79-6.72 (m, 2H), 2.39 (s, 3H), 1.45 (s, 18H, *t*-Bu).  $^{13}\text{C}$  NMR (101 MHz,  $\text{CDCl}_3$ ,  $25^\circ\text{C}$ ):  $\delta/\text{ppm}$  = 167.48, 165.23, 164.81, 163.03, 152.61, 152.00, 150.24, 148.84, 148.45, 141.21, 140.51, 138.76, 138.43, 137.81, 135.42, 131.38, 130.25, 129.87, 127.99, 125.86, 125.29, 123.63, 123.45, 123.17, 122.90, 122.81, 121.76, 121.54, 121.49, 120.71, 119.92, 119.42, 119.19, 114.94, 114.42, 109.43, 35.31, 31.56, 20.81. ESI-MS:  $m/z$  961.3436  $[\text{M}+\text{H}]^+$ . Anal. Calcd for  $\text{C}_{55}\text{H}_{47}\text{N}_3\text{O}$ : C, 68.74; H, 4.93; N, 4.37. Found: C, 68.45; H, 4.92; N, 4.36.

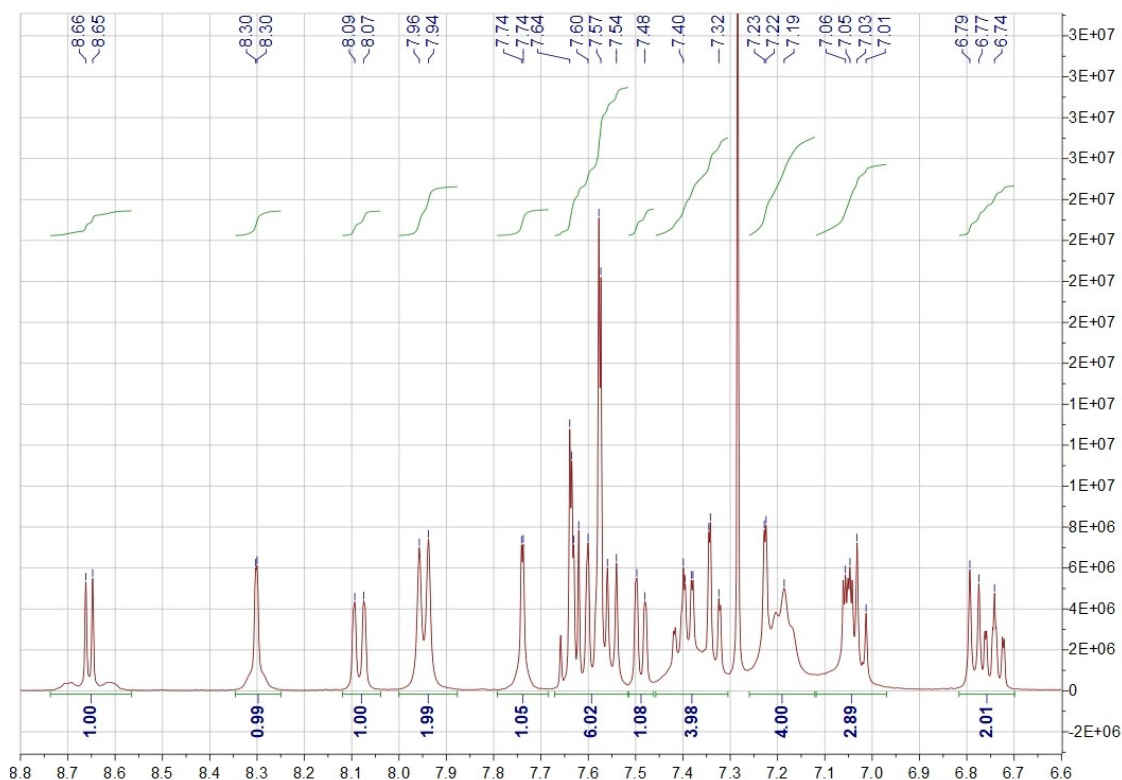

$^1\text{H}$  NMR spectrum (400 MHz) of **Pt3** in  $\text{CDCl}_3$  (aromatic region).

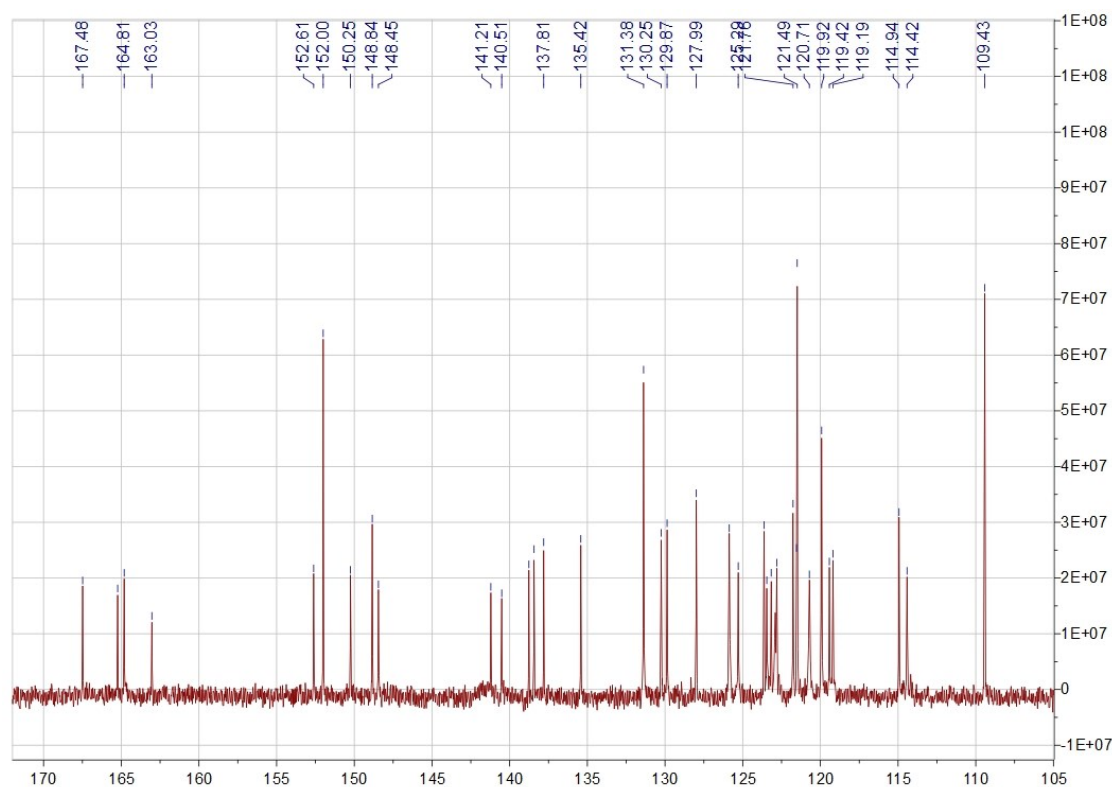

$^{13}\text{C}$  NMR spectrum (101 MHz) of **Pt3** in  $\text{CDCl}_3$  (aromatic region).

**+ Scan (rt: 1.808-2.558 min) Sub (3)**

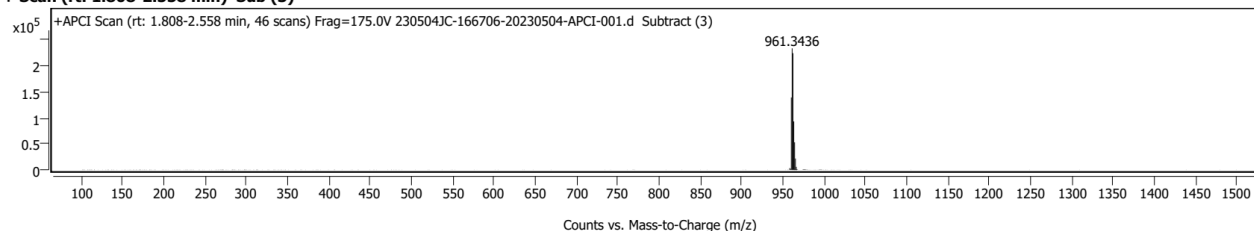

*Spectrum Peaks*

| m/z      | Z | Abund  | Abund % | m/z (Calc) | Diff (ppm) | Ion Species | Formula | Ion Type |
|----------|---|--------|---------|------------|------------|-------------|---------|----------|
| 958.3382 | 1 | 2997   | 1.28    |            |            |             |         |          |
| 960.3407 | 1 | 139489 | 59.54   |            |            |             |         |          |
| 961.3436 | 1 | 234296 | 100.00  |            |            |             |         |          |
| 962.3451 | 1 | 224941 | 96.01   |            |            |             |         |          |
| 963.3473 | 1 | 93208  | 39.78   |            |            |             |         |          |
| 964.3478 | 1 | 52893  | 22.58   |            |            |             |         |          |
| 965.3496 | 1 | 21593  | 9.22    |            |            |             |         |          |
| 966.3523 | 1 | 5680   | 2.42    |            |            |             |         |          |

HRMS results of **Pt3**.

**Synthesis of Pt4.** Potassium tetrachloroplatinate(II) (623 mg, 1.5 mmol) was grinded from a dark red crystal to a pink powder. The grinded potassium tetrachloroplatinate(II) powder and tetrabutylammonium bromide (323 mg, 1 mmol) were added to acetic acid (100 mL) and water (1 mL). Then a solution of ligand 7 (772 mg, 1 mmol) in chloroform (10 mL) was added to the previous suspension. Subsequently, the mixture was heated to reflux under vigorous stir for 12 h in an argon atmosphere and the solvent was removed under reduced pressure. The residue was suspended in water (100 mL) and extracted with dichloromethane ( $3 \times 30$  mL). The combined organic phase was washed with brine ( $2 \times 30$  mL) and dried under anhydrous magnesium sulphate.

The solvent was vaporized under vacuum and the residue (a dark red solid) was directly used for the next step. Carbazole (251 mg, 1.5 mmol) and cesium carbonate (978 mg, 3 mmol) were dissolved in anhydrous dimethylformamide (100 mL). The mixture was heated to 80°C and the dark red solid obtained from the previous step was added. Then, the suspension was heated to reflux for 2 hours and cooled to r.t.. The residue was poured to dichloromethane (300 mL) and the organic phase was washed with water (3 × 500 mL) and brine (2 × 300 mL). Then, the organic phase was dried under magnesium sulphate and vaporized under vacuum. The product was separated through a silica gel column (120 g, eluent: hexane/DCM (v/v) = 10/1 to 2/1), which is further purified by recrystallization in hexane/DCM = 45 mL/5 mL (50°C to r.t., in darkness, 5 h) and collected as a bright yellow solid (902 mg, isolated yield: 81%). <sup>1</sup>H NMR (500 MHz, CD<sub>2</sub>Cl<sub>2</sub>, 25°C): δ/ppm = 8.29 (d, *J* = 1.8 Hz, 1H), 8.09 – 7.97 (m, 7H), 7.93 (d, *J* = 7.9 Hz, 2H), 7.75 (d, *J* = 1.8 Hz, 1H), 7.62 (d, *J* = 1.8 Hz, 1H), 7.59 (d, *J* = 1.8 Hz, 2H), 7.53 (d, *J* = 7.7 Hz, 1H), 7.42 (ddd, *J* = 8.2, 7.1, 1.2 Hz, 4H), 7.30 – 7.22 (m, 9H), 7.05 (dd, *J* = 8.5, 1.4 Hz, 1H), 6.97 (t, *J* = 7.7 Hz, 1H), 6.93 (d, *J* = 2.0 Hz, 1H), 6.65 (ddd, *J* = 8.2, 6.6, 1.5 Hz, 1H), 6.51 (dd, *J* = 5.9, 2.0 Hz, 1H), 6.20 (d, *J* = 7.6 Hz, 1H), 1.42 (s, 18H). <sup>13</sup>C NMR (126 MHz, CD<sub>2</sub>Cl<sub>2</sub>, 25°C): δ/ppm = 166.99, 165.06, 164.67, 162.85, 152.29, 151.99, 150.14, 148.15, 145.36, 141.37, 141.33, 140.91, 140.01, 138.17, 138.13, 137.13, 132.18, 131.31, 131.14, 129.68, 126.21, 124.95, 123.66, 123.30, 123.16, 123.12, 122.93, 121.60, 121.45, 121.25, 121.11, 120.60, 120.57, 120.25, 118.82, 118.34, 114.51, 114.41, 109.36, 34.96, 31.19. ESI-MS: *m/z* 1113.3838 [M+H]<sup>+</sup>. Anal. Calcd for C<sub>66</sub>H<sub>52</sub>N<sub>4</sub>OPt: C, 71.27; H, 4.71; N, 5.04. Found: C, 70.78; H, 4.72; N, 4.86.

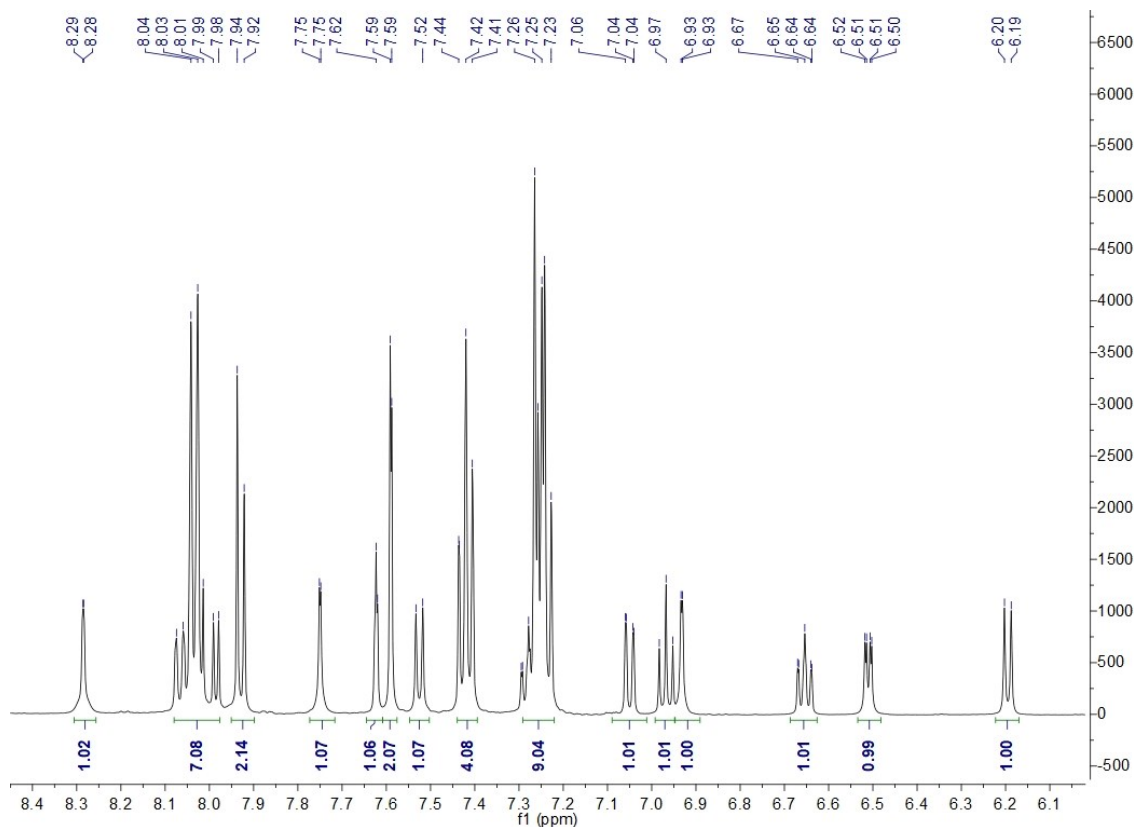



$^1\text{H}$  NMR spectrum (500 MHz) of **Pt4** in  $\text{CD}_2\text{Cl}_2$  (aromatic region).

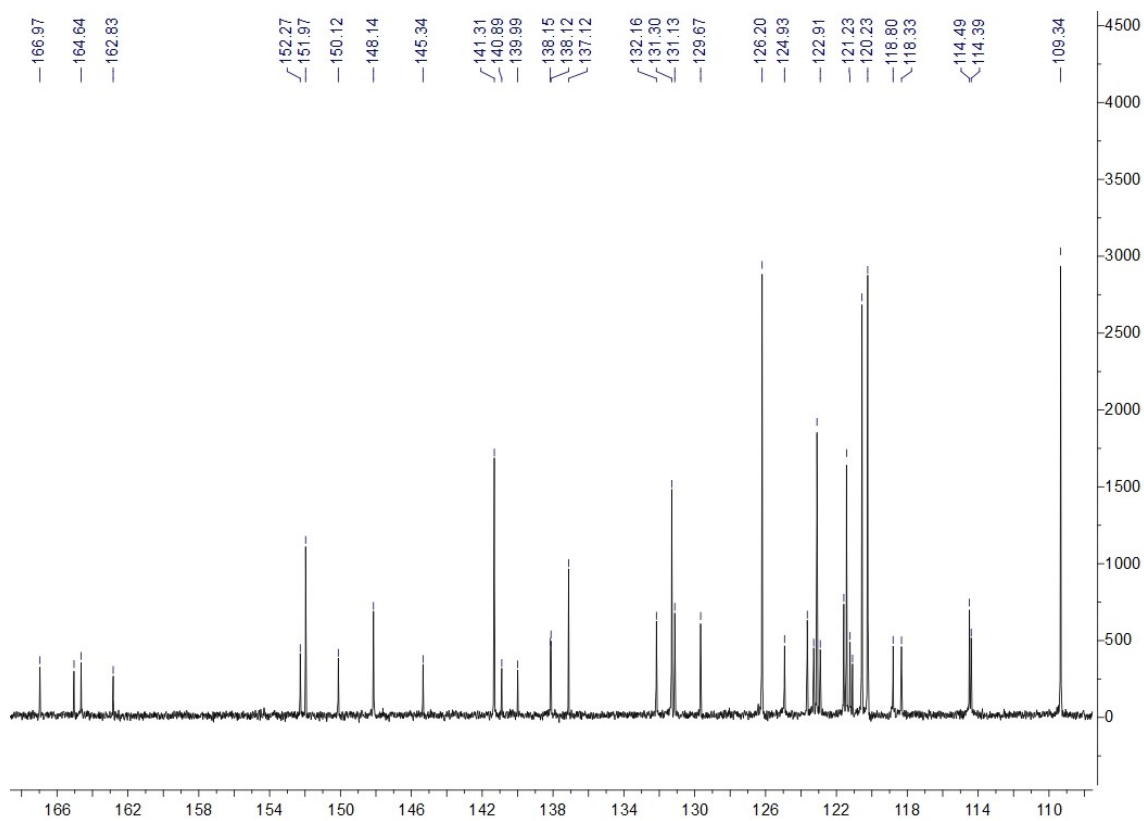

$^{13}\text{C}$  NMR spectrum (126 MHz) of **Pt4** in  $\text{CD}_2\text{Cl}_2$  (aromatic region).

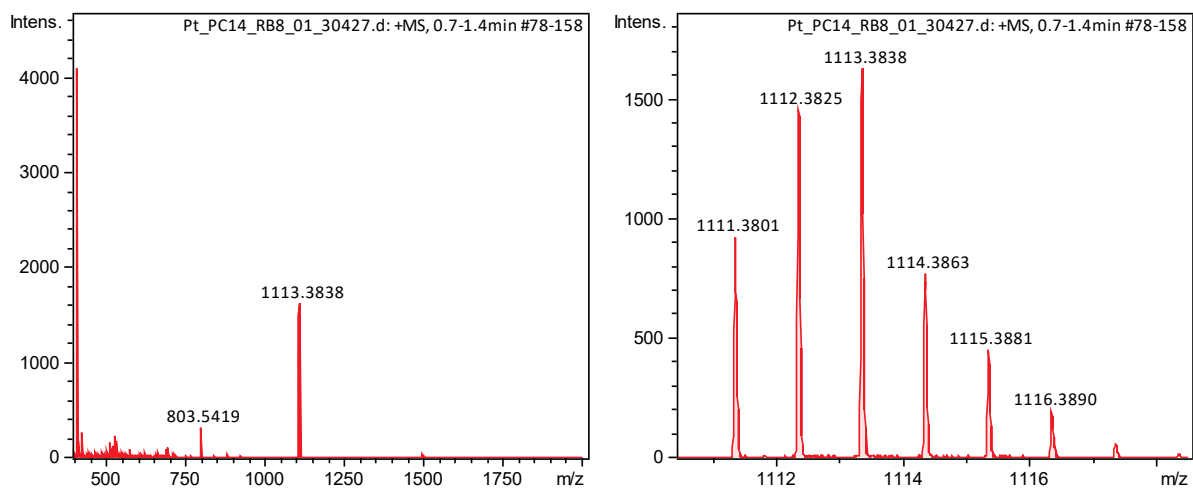

HRMS results of **Pt4**.

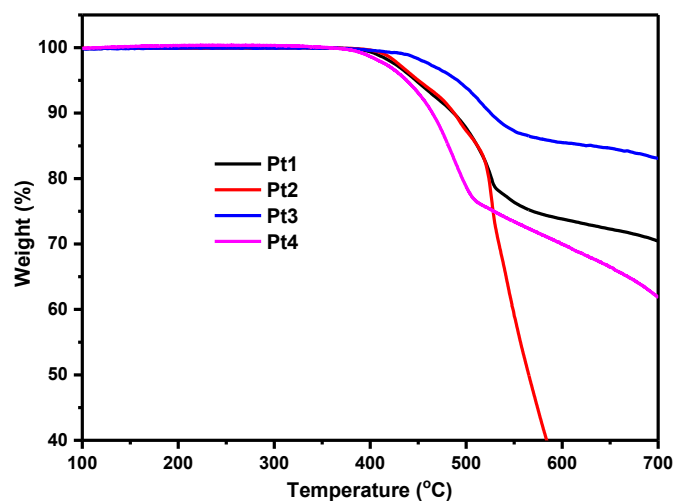

Figure S1. TGA thermograms of Pt1–Pt4.

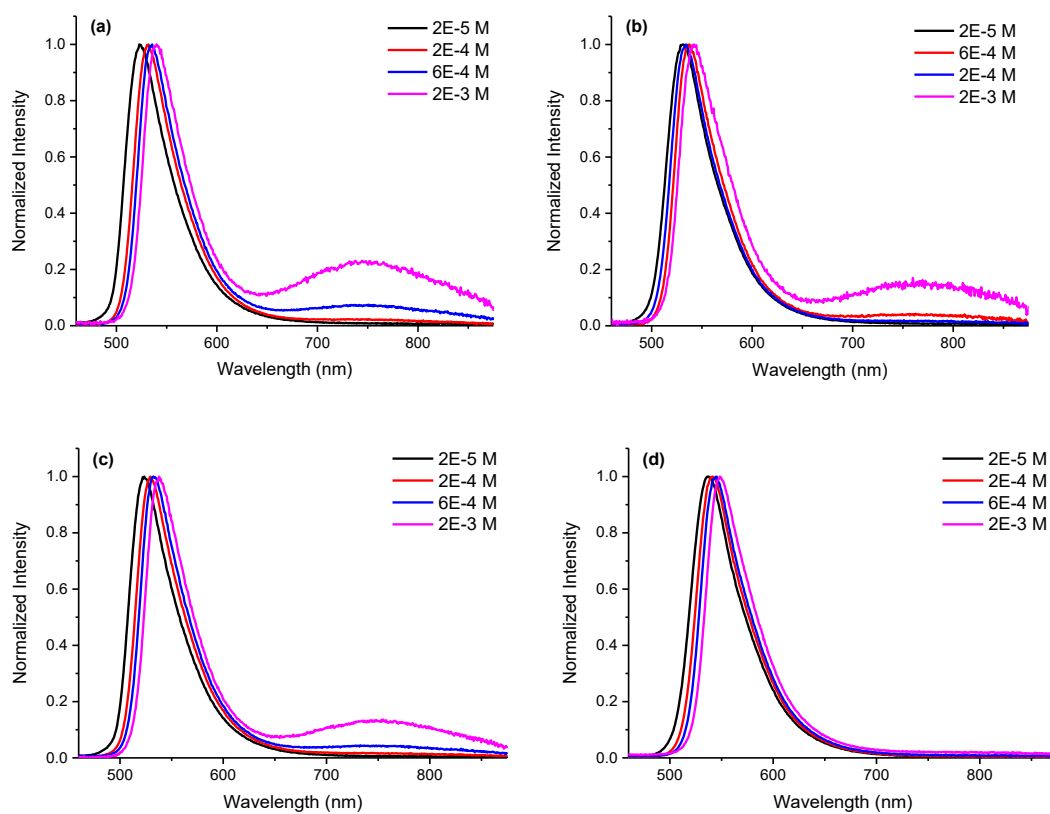

Figure S2. Emission spectra of (a) Pt1, (b) Pt2, (c) Pt3 and (d) Pt4 in toluene at different concentrations.

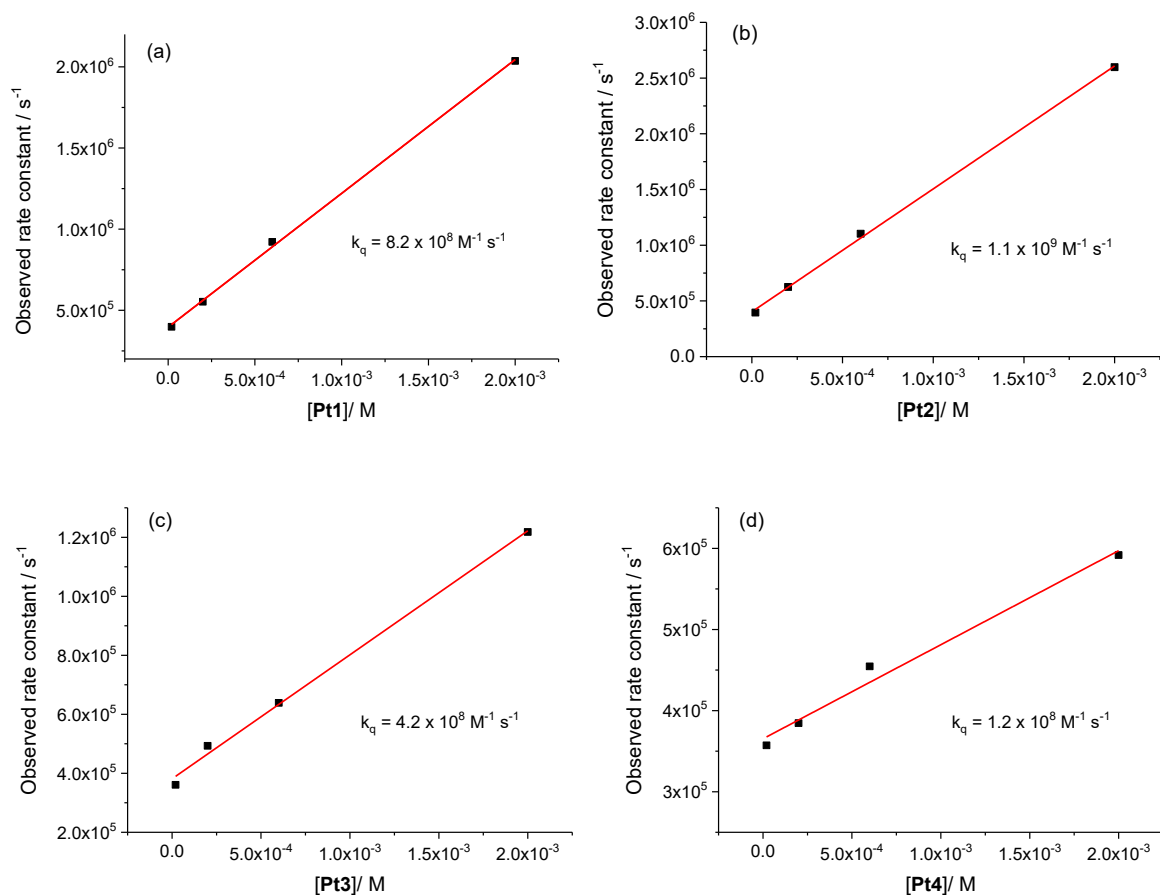

Figure S3. Stern-Volmer plot of (a) Pt1, (b) Pt2, (c) Pt3 and (d) Pt4 in toluene.

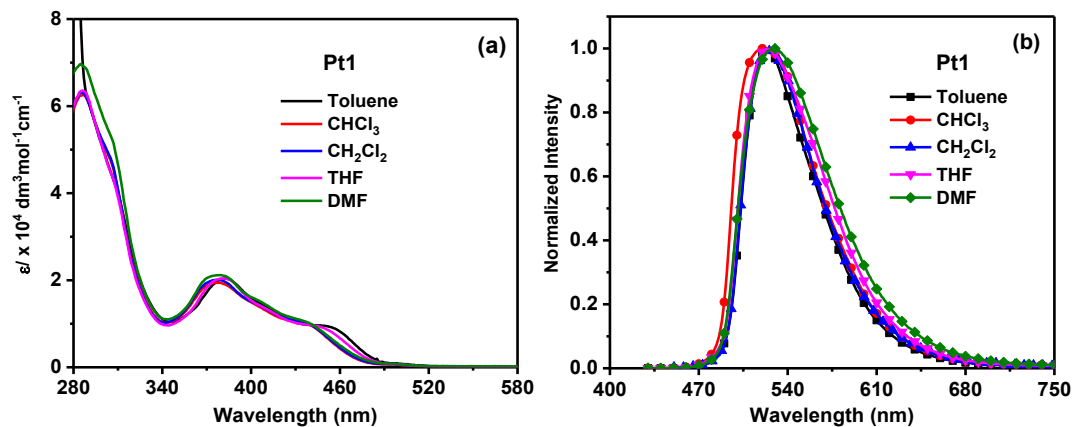

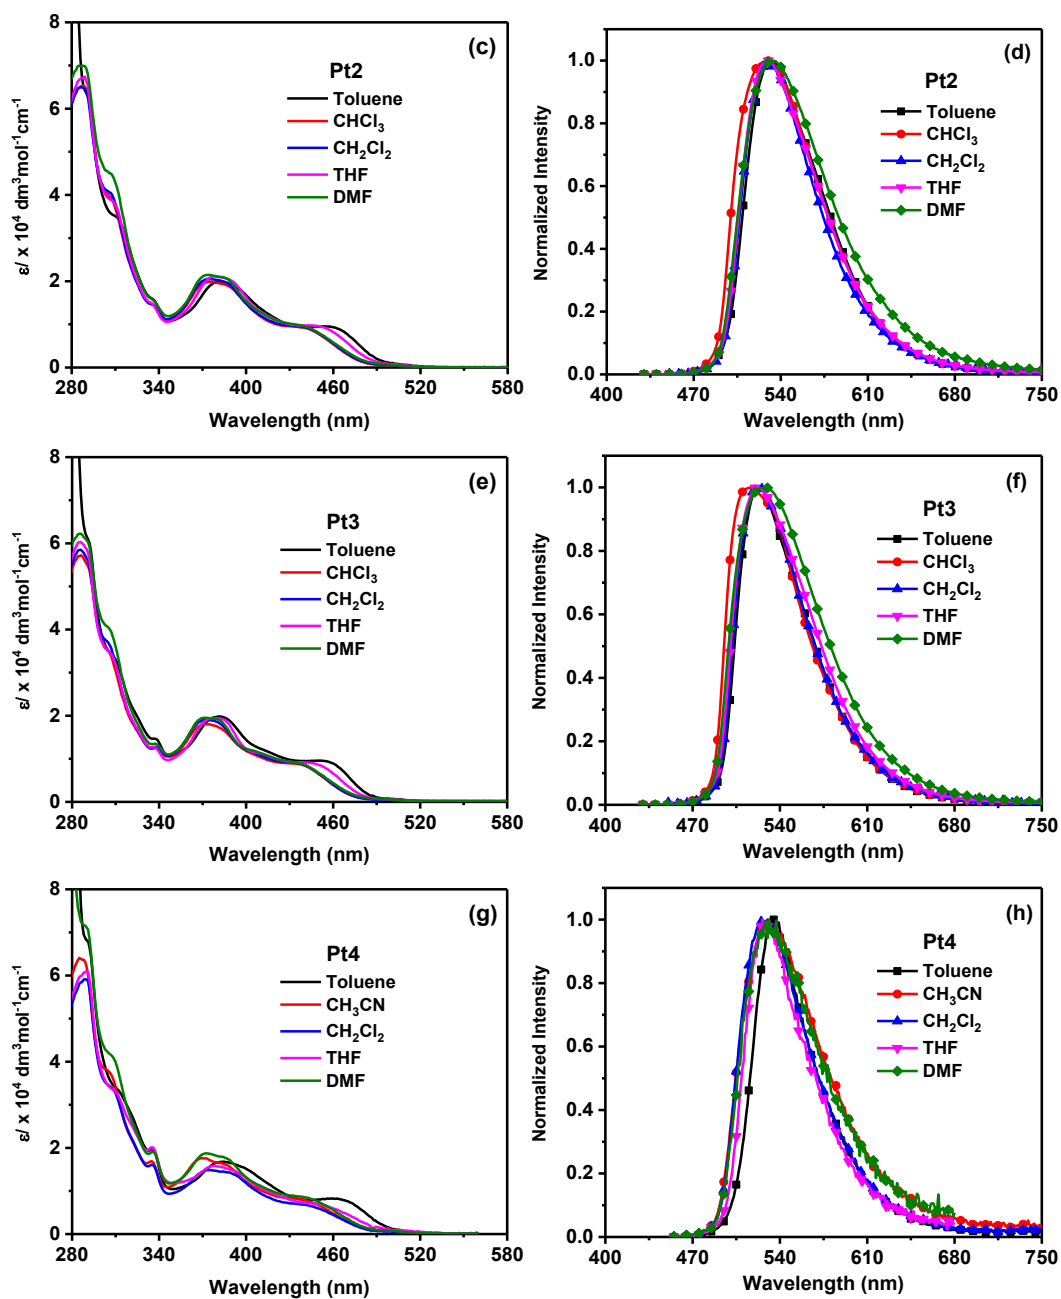

Figure S4. (a, c, e, g) UV-vis absorption spectra and (b, d, f, h) emission spectra of **Pt1–Pt4**, respectively, in different solvents ( $2 \times 10^{-5}$  M).

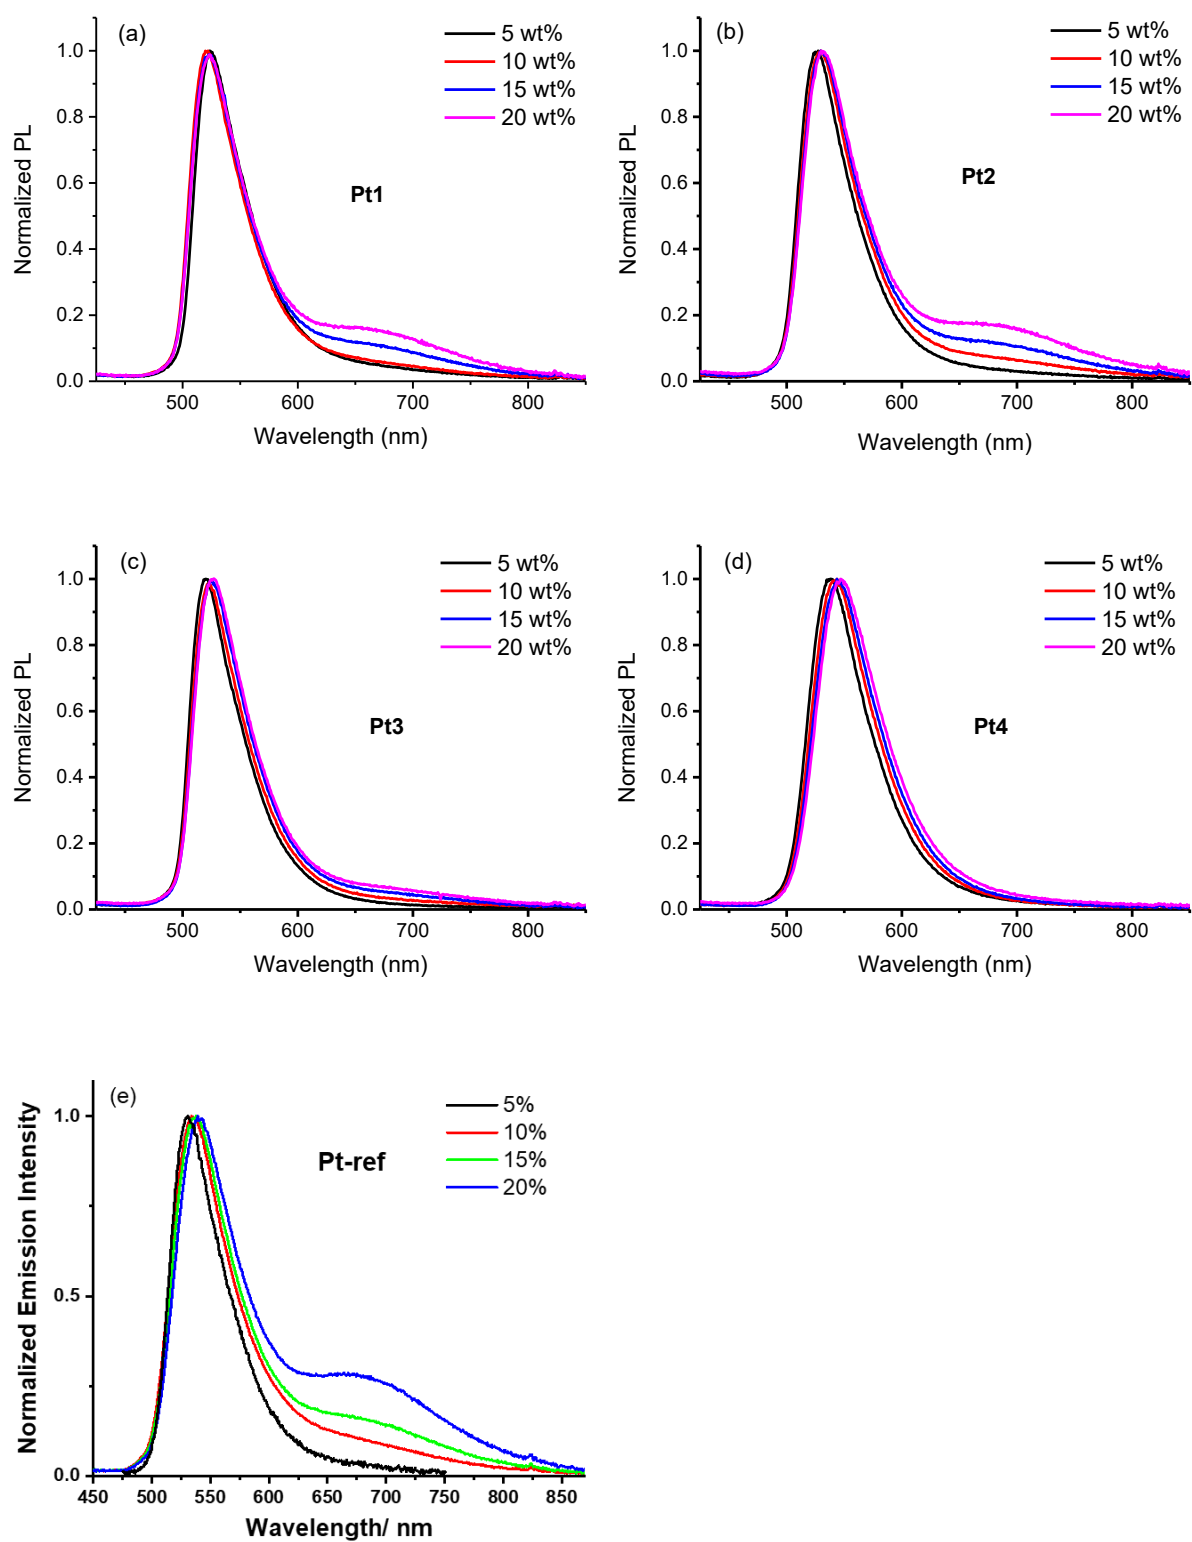

Figure S5. Emission spectra of (a) **Pt1**, (b) **Pt2**, (c) **Pt3**, (d) **Pt4** and (e) **Pt-ref** in mCP thin films with different doping concentration (5–20 wt%).

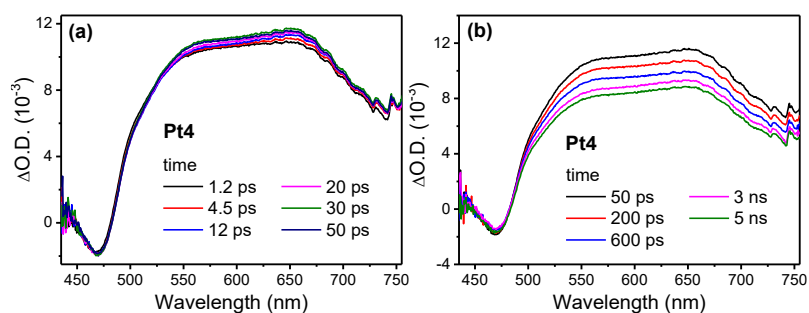

Figure S6. Temporal evolution of fs-TA of **Pt4** (a) from 1.2 ps to 50 ps, and (b) from 50 ps to 5 ns in toluene upon 400 nm excitation.

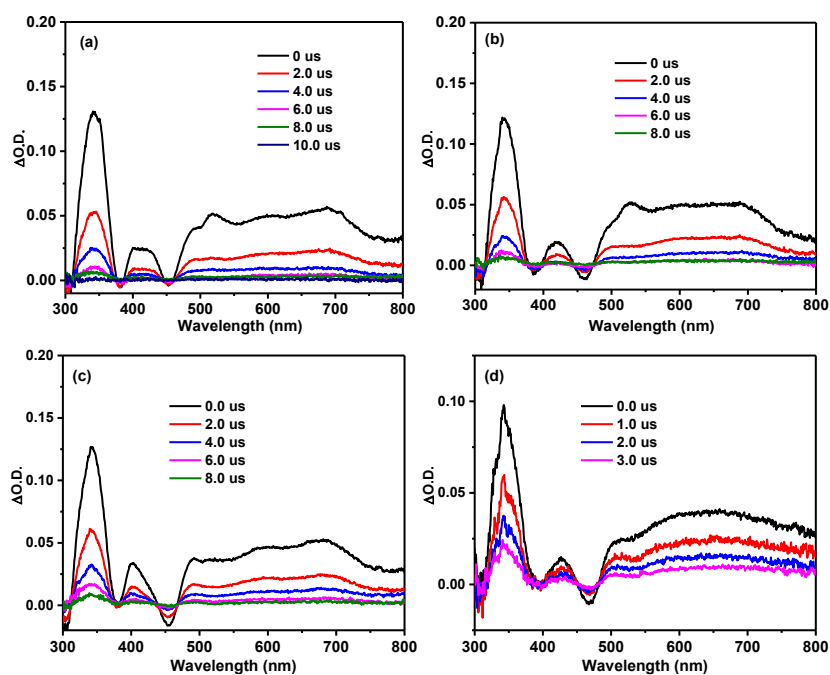

Figure S7. Time-resolved transient absorption (ns-TA) spectra of (a) **Pt1**, (b) **Pt2**, (c) **Pt3** and (d) **Pt4** in toluene ( $2 \times 10^{-5}$  M).

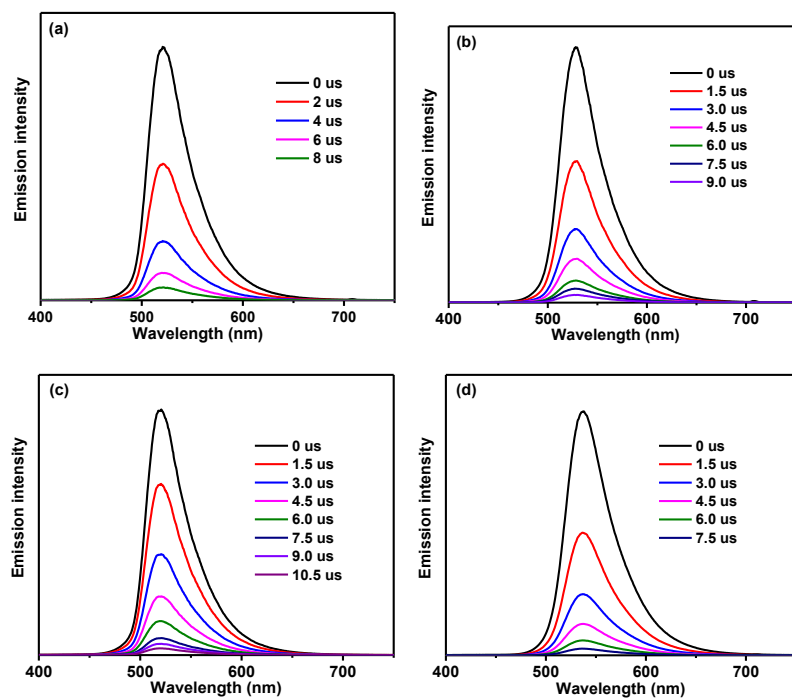

Figure S8. Time-resolved emission spectra of (a) **Pt1**, (b) **Pt2**, (c) **Pt3** and (d) **Pt4** in toluene ( $2 \times 10^{-5}$  M).

## Computational Details

All geometric optimization, potential energy surface scan and frequency analysis calculations at DFT/PBE0-D3BJ level were performed using Gaussian 16 (revision C.01) program package.<sup>[S2]</sup> The ECP60MWB<sup>[S3]</sup> basis set was used for Pt atom, and 60 core electrons were replaced with the corresponding pseudopotential. The 6-31G(d,p) basis set was used for all non-metal atoms. The solvation effect of bulk toluene environment was simulated with SMD (solvation model based on density) model.<sup>[S4]</sup> The optimized structures were confirmed to be true minima since no imaginary frequencies were observed.

To account for large spin-orbit coupling (SOC) and relativistic effects induced by Pt center, the SOC-TDDFT/PBE0<sup>[S5]</sup> calculations with the zero-order regular approximation (ZORA) Hamiltonian,<sup>[S6]</sup> in connection with segmented all-electron relativistically contracted (SARC) basis sets SARC-ZORA-TZVP<sup>[S7,S8]</sup> for the central Pt atom and ZORA-def2-TZVP<sup>[S3,S7]</sup> for all other atoms, were performed using ORCA (release 5.0.3) program package.<sup>[S9]</sup> The solvent effect was included using the SMD model. The SOC-TDDFT/PBE0 calculations took 25 lowest scalar relativistic singlet and triplet excitations into accounts, resulting in totally 100 SOC states. Before the consideration of SOC induced mixing of the singlet and triplet states, main orbital transitions involve in the  $T_1 \rightarrow S_0$  transition of **Pt1–Pt4** are summarized in Table S1. Due to the SOC effect, the  $T_1$  state is split into three sublevels in the absence of an external field, which is referred to as the zero-field splitting (ZFS). The radiative rate constant  $k_r^i$  and radiative lifetime  $\tau_i$  from sublevel  $T_1^i$  ( $i = 1, 2, 3$ ) to  $S_0$  state is given by<sup>[S10]</sup>

$$k_r^i = \frac{1}{\tau_i} = \frac{4\alpha_0^3}{3t_0} (\Delta E_{S_0-T_1^i})^3 \sum_{\sigma \in \{x,y,z\}} |M_\sigma^i|^2, \quad (1)$$

where  $t_0 = (4\pi\epsilon_0)^2 \hbar^3 / (m_e e^4)$ ,  $\alpha_0$  is the fine structure constant,  $\Delta E_{S_0-T_1^i}$  is the transition energy, and  $M_\sigma^i$  is the transition dipole moment. The oscillator strength  $f_{osc}^i$  of the transition  $T_1^i \rightarrow S_0$  is defined as<sup>[S11]</sup>

$$f_{osc}^i = \frac{2m_e}{3\hbar^2} \Delta E_{S_0-T_1^i} \sum_{\sigma \in \{x,y,z\}} |M_\sigma^i|^2. \quad (2)$$

According to the Stickler-Berg relationship,<sup>[S11]</sup> the radiative rate  $k_r^i$  (or lifetime  $\tau_i$ ) was multiplied (or divided) by the squared refractive index of toluene ( $n = 1.496$ ).

The overall observed phosphorescence rate constant  $k_r$  and radiative lifetime  $\tau$  from  $T_1$  state, assuming the Boltzmann distribution of the sublevels, is given by

$$k_r = \frac{1}{\tau} = \frac{k_r^1 + k_r^2 \exp\left(-\frac{\Delta E_{1,2}^{ZFS}}{k_B T}\right) + k_r^3 \exp\left(-\frac{\Delta E_{1,3}^{ZFS}}{k_B T}\right)}{1 + \exp\left(-\frac{\Delta E_{1,2}^{ZFS}}{k_B T}\right) + \exp\left(-\frac{\Delta E_{1,3}^{ZFS}}{k_B T}\right)}. \quad (3)$$

Here,  $\Delta E_{i,j}^{ZFS}$  is the zero-field splitting between the sublevels  $i$  and  $j$ . The high-temperature limit ( $k_B T \gg \Delta E_{i,j}^{ZFS}$ ) of Eq. (3) can be cast to



$$k_r = \frac{1}{\tau} \approx \frac{1}{3} \sum_{i=1}^3 k_r^i. \quad (4)$$

To estimate the nonradiative decay rate constant ( $k_{nr}$ ) from T<sub>1</sub> to S<sub>0</sub> state based on the Marcus theory

$$k_{nr} = \frac{2\pi}{\hbar} \frac{|H_{SOC}|^2}{\sqrt{4\pi\lambda k_B T}} \exp\left(-\frac{(\lambda + \Delta E_{S_0-T_1})^2}{4\lambda k_B T}\right), \quad (5)$$

we further computed the optimized structures of the T<sub>1</sub> state for complexes **Pt1–Pt4** (Figure S9). Here,  $H_{SOC}$  is the SOC matrix element between S<sub>0</sub> and T<sub>1</sub> state,  $\lambda$  and  $\Delta E_{S_0-T_1}$  are total reorganization energy and the energy difference between the S<sub>0</sub> and T<sub>1</sub> states at their optimized structures. It is obvious that the structural distortion from optimized T<sub>1</sub> to S<sub>0</sub> state is marginally small (root-mean-square difference < 0.3 Å), and the energy difference between optimized T<sub>1</sub> and S<sub>0</sub> structures at the ground state is < 4 kcal/mol for all complexes. The inner-sphere reorganization energies of **Pt1–Pt4** are computed to be < 1400 cm<sup>-1</sup>, while the  $\Delta E_{S_0-T_1}$  are over 18000 cm<sup>-1</sup> (Table S2). By assuming that the outer-sphere reorganization energy is of similar magnitude as inner-sphere reorganization energy, the  $k_{nr}$  is negligibly small as compared to the radiative rate constant. This is in line with high photoluminescent quantum yield (close to 1) observed in the experiment. The emission bandwidth is also anticipated to be small due to the small difference between optimized S<sub>0</sub> and T<sub>1</sub> state structures.

Table S1. Contributions from the main molecular orbital transitions to the T<sub>1</sub> state. The percentages are computed as the squared amplitudes that constitute the TDDFT wave function.

| Complex    | Orbital transition | Contribution |
|------------|--------------------|--------------|
| <b>Pt1</b> | HOMO→LUMO          | 63.8%        |
|            | HOMO→LUMO+2        | 10.2%        |
| <b>Pt2</b> | HOMO→LUMO          | 66.3%        |
|            | HOMO→LUMO+2        | 9.3%         |
| <b>Pt3</b> | HOMO→LUMO          | 65.1%        |
|            | HOMO→LUMO+2        | 8.6%         |
| <b>Pt4</b> | HOMO→LUMO          | 66.0%        |
|            | HOMO→LUMO+2        | 9.2%         |

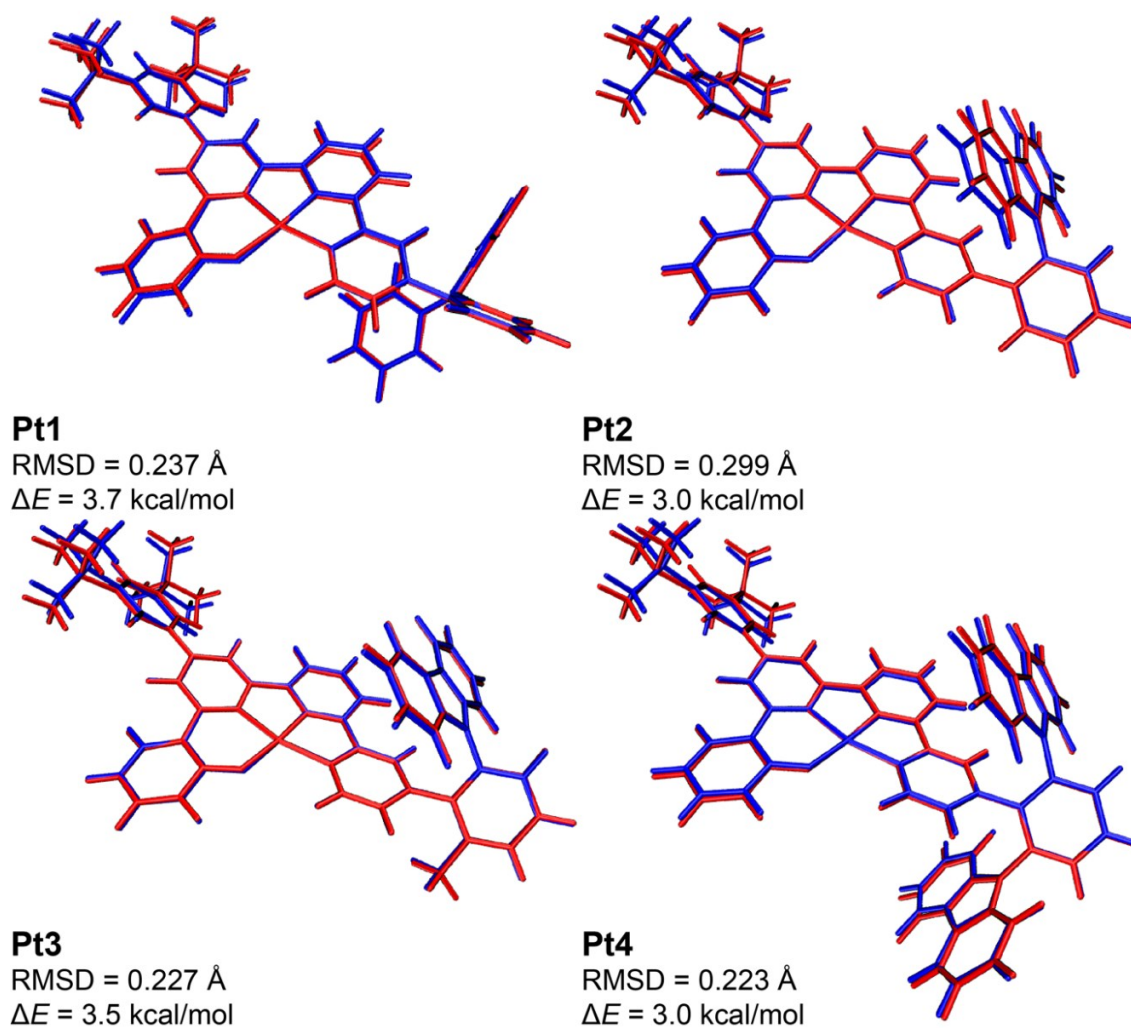

Figure S9. Comparison between optimized  $S_0$  (in blue) and  $T_1$  (in red) state structures for complexes **Pt1–Pt4**. The root-mean-square difference (RMSD) and the energy difference between two structures at the  $S_0$  state ( $\Delta E$ ) are also listed.

Table S2. Computed inner-sphere reorganization energies ( $\lambda$ ) and adiabatic energy gaps ( $\Delta E_{S_0-T_1}$ ) for complexes **Pt1–Pt4**.

|            | $\lambda$ ( $\text{cm}^{-1}$ ) | $\Delta E_{S_0-T_1}$ ( $\text{cm}^{-1}$ ) |
|------------|--------------------------------|-------------------------------------------|
| <b>Pt1</b> | 1371                           | 18719                                     |
| <b>Pt2</b> | 1065                           | 18605                                     |
| <b>Pt3</b> | 1249                           | 18739                                     |
| <b>Pt4</b> | 1098                           | 18518                                     |

## OLED fabrication and characterization

OLEDs were fabricated in a Kurt J. Lesker SPECTROS vacuum deposition system with a base pressure of  $10^{-8}$  mbar. In the vacuum chamber, organic materials were thermally deposited in sequence at a rate of  $\sim 0.1$  nm  $s^{-1}$ . The doping process in the emitting layer was realized by co-deposition technology. Afterwards, LiF (1.2 nm) and Al (100 nm) were thermally deposited at rates of 0.03 and 0.2 nm  $s^{-1}$ , respectively. Film thicknesses were determined in situ by calibrated oscillating quartz-crystal sensors. EL spectra, J-L-V characteristics, CIE coordinates, EQE, CE and PE were measured using a Keithley 2400 source-meter and an absolute external quantum efficiency measurement system (C9920-12, Hamamatsu Photonics). All devices were characterized at room temperature without encapsulation. The device structure for **Pt1–Pt3**-OLEDs is ITO/HAT-CN (5 nm)/TAPC (40 nm)/mCBP (5 nm)/Pt emitter: mCBP (25 nm)/PPF (10 nm)/TmPyPb (40 nm)/LiF (1.2 nm)/Al (100 nm). The device structure for **Pt4**-OLEDs is ITO/HAT-CN (10 nm)/BPBPA (80 nm)/NBP-BC (5 nm)/**Pt4**: RH (40 nm)/HB (5 nm)/ZADN: Liq (35 nm)/Yb (1 nm)/Ag (100 nm).

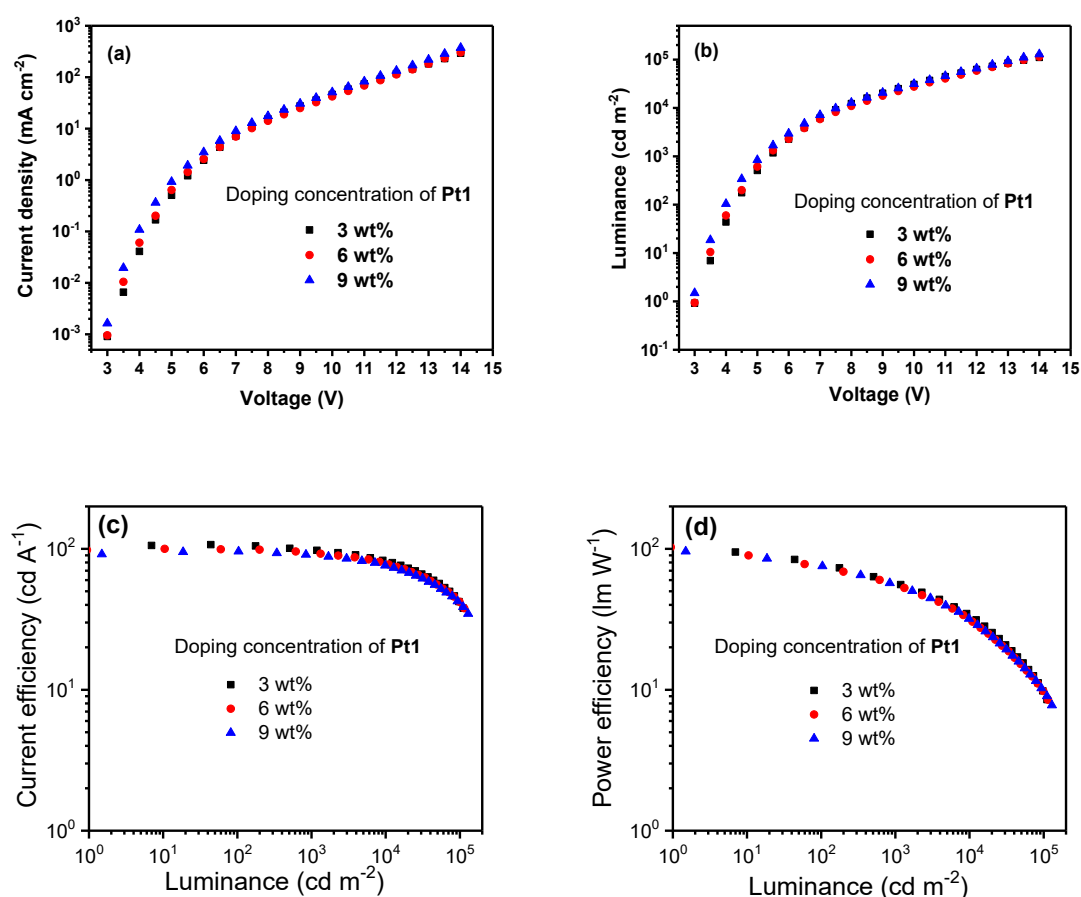

Figure S10. (a) Current density-voltage, (b) luminance-voltage, (c) current efficiency-luminance, and (d) power efficiency-luminance characteristics of the OLEDs based on **Pt1** with different doping concentrations.

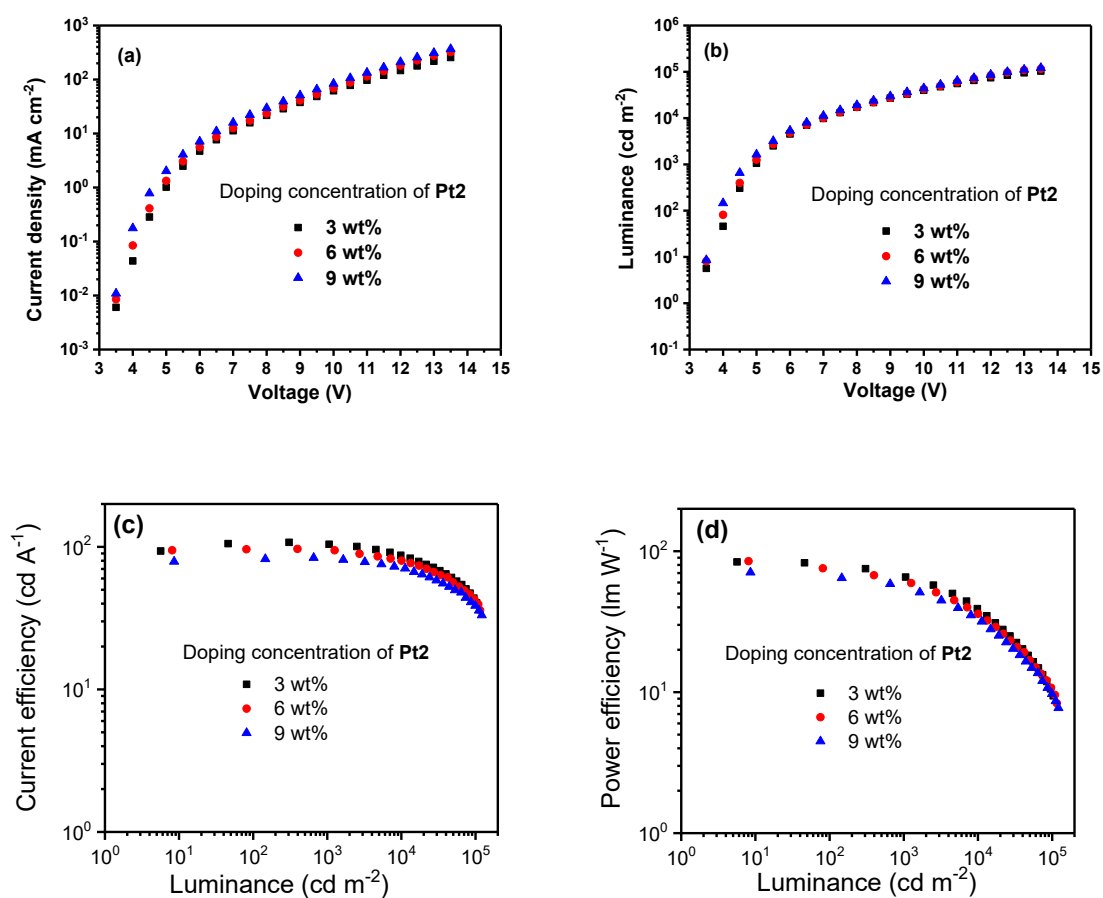

Figure S11. (a) Current density-voltage, (b) luminance-voltage, (c) current efficiency-luminance, and (d) power efficiency-luminance characteristics of the OLEDs based on **Pt2** with different doping concentrations.

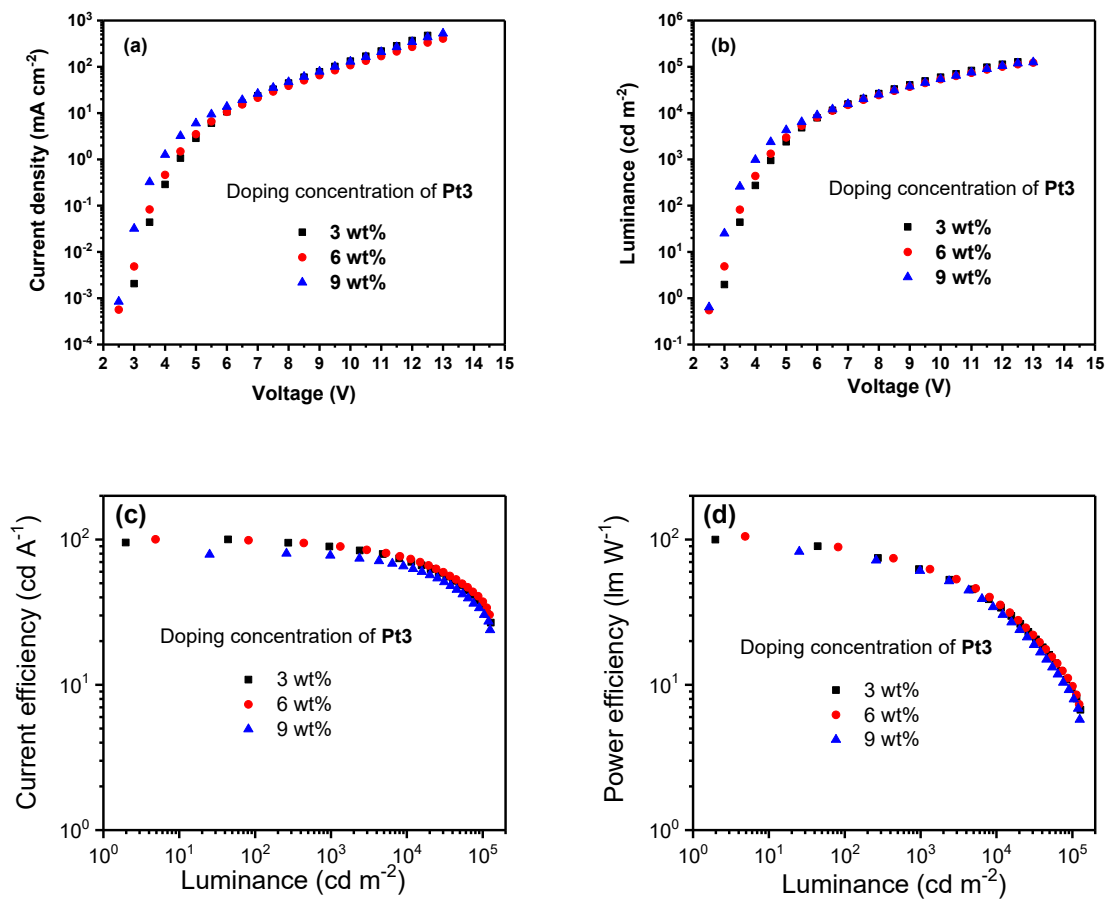

Figure S12. (a) Current density-voltage, (b) luminance-voltage, (c) current efficiency-luminance, and (d) power efficiency-luminance characteristics of the OLEDs based on **Pt3** with different doping concentrations.

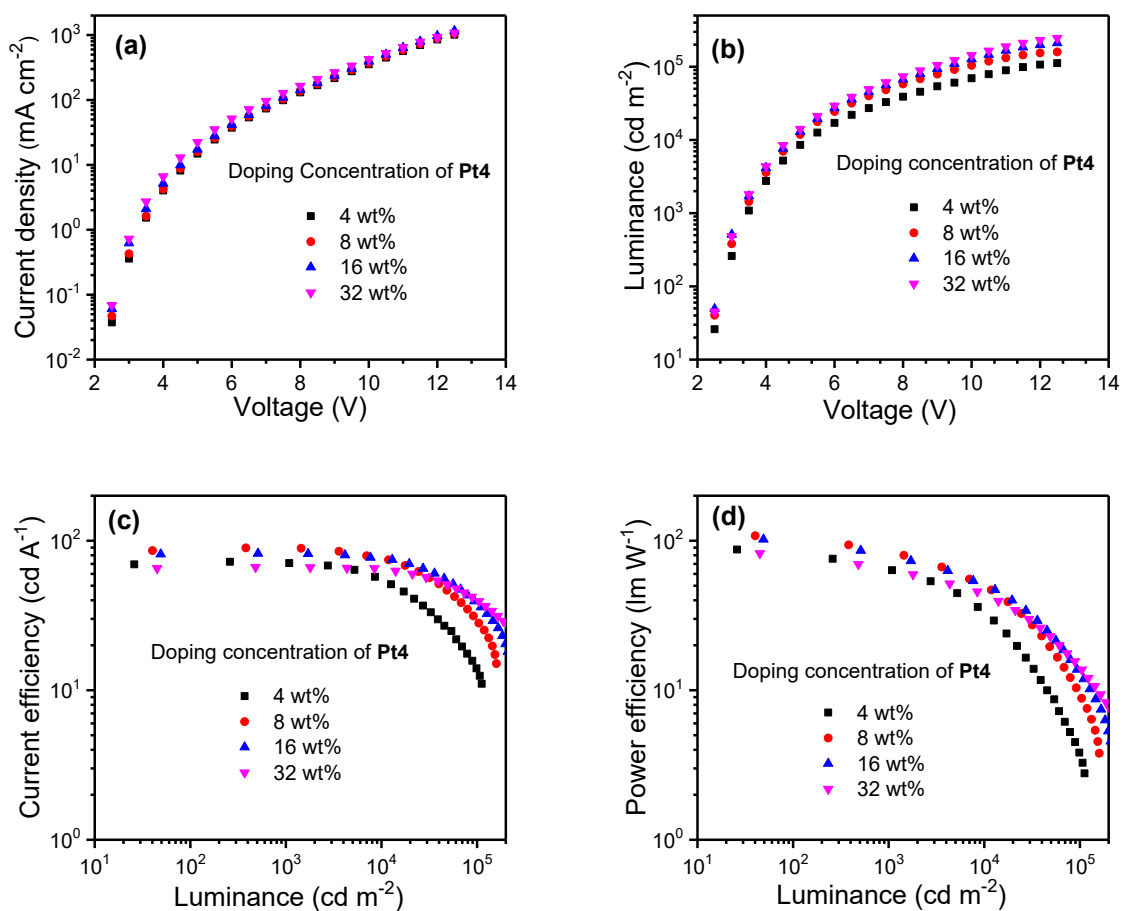

Figure S13. (a) Current density-voltage, (b) luminance-voltage, (c) current efficiency-luminance, and (d) power efficiency-luminance characteristics of the OLEDs based on **Pt4** with different doping concentrations.

### Details for the measurement of device stability

Devices with **Pt1–Pt3** for operating lifetime measurement were fabricated in an ALS vacuum deposition system with a base pressure of  $1.0 \times 10^{-5}$  Pa, and they were encapsulated in a glovebox ( $N_2 < 1$  ppm,  $O_2 < 1$  ppm). The device structure for OLEDs with **Pt1–Pt3** is given in Figure S14. Prior to deposition, the patterned ITO coated glass substrates were cleaned with detergent, rinsed in deionized water, acetone, and isopropanol, and then dried in an oven for 1 h. Organic layers were deposited in sequence at a rate of  $1.0 \text{ \AA/s}$ . Afterward, Yb (1 nm) and Ag (100 nm) were thermally deposited at rates of  $0.1 \text{ \AA s}^{-1}$  and  $1 \text{ \AA s}^{-1}$ , respectively. Current density-luminance-voltage characteristics, EL spectra, and EQE of EL device were obtained by using a Keithley 2400 source-meter and an absolute external quantum efficiency measurement system (CS2000, KONICA MINOLTA). Devices with **Pt4** for operating lifetime measurement were fabricated in a Kurt J. Lesker SPECTROS vacuum deposition system. Current density-brightness-voltage characteristics, EL spectra, and EQE of EL device were obtained by using a Keithley 2400 source-meter and an absolute external quantum efficiency measurement system (C9920-12, Hamamatsu Photonics). The **Pt4**-devices were encapsulated in a 200-nm-thick  $Al_2O_3$  thin film deposited by atomic layer deposition (ALD) in a Kurt J. Lesker SPECTROS ALD system before measurements. The device structure for **Pt4**-OLEDs is ITO/HAT-CN (10 nm)/BPBPA (80 nm)/NBP-BC (5 nm)/**Pt4**: RH (40 nm)/HB (5 nm)/ZADN: Liq (35 nm)/Yb (1 nm)/Ag (100 nm), which is the same as described in the “OLED fabrication and characterization” section.

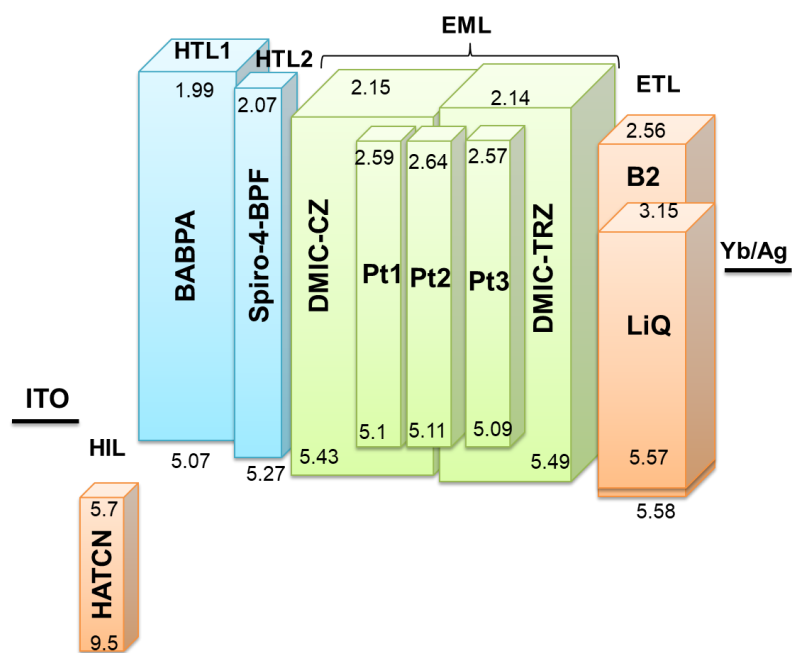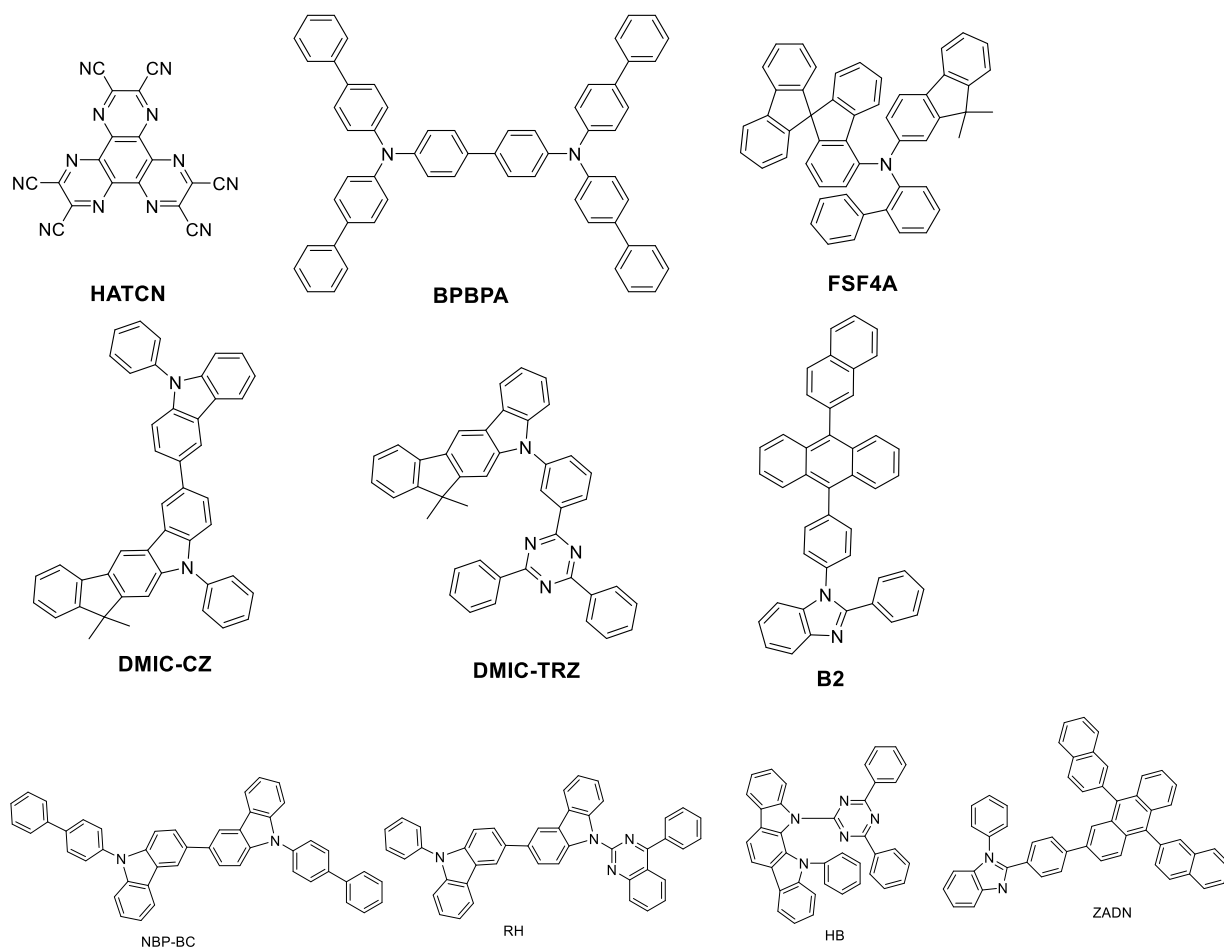

Figure S14. Device structure used in the OLEDs with **Pt1–Pt3** for operating lifetime measurement and chemical structures of the organic materials for the devices with **Pt1–Pt4**.



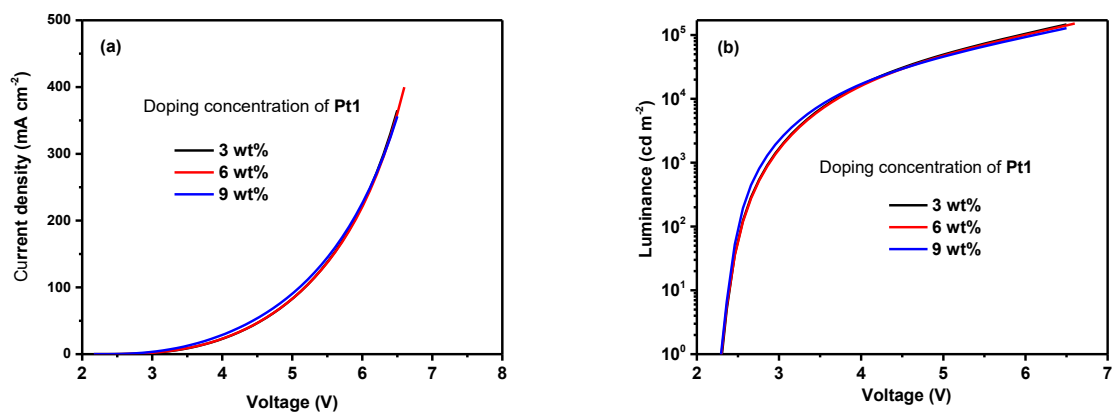

Figure S15. (a) Current density-voltage and (b) luminance-voltage characteristics of the OLEDs based on **Pt1** with different doping concentrations for operating lifetime measurement.

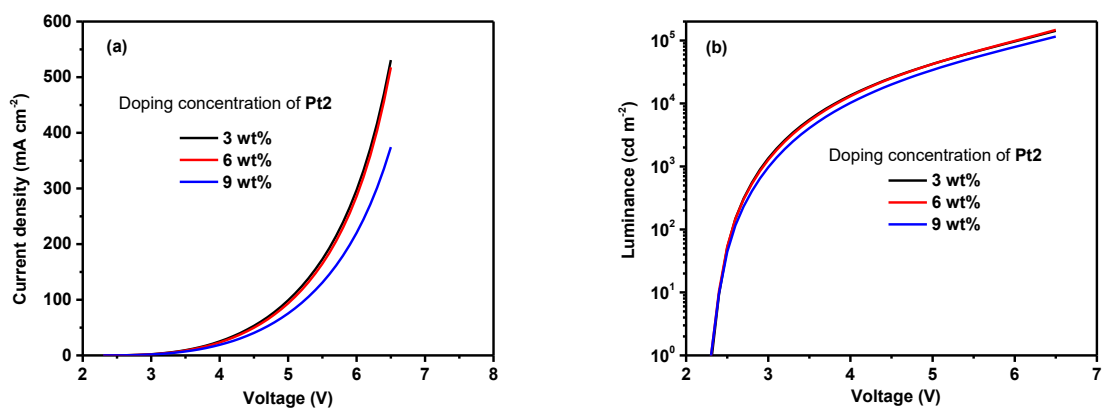

Figure S16. (a) Current density-voltage and (b) luminance-voltage characteristics of the OLEDs based on **Pt2** with different doping concentrations for operating lifetime measurement.

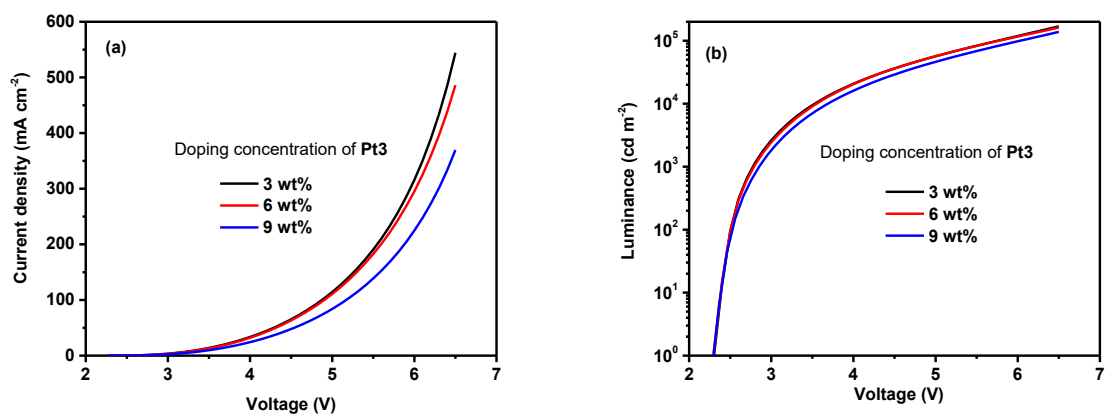

Figure S17. (a) Current density-voltage and (b) luminance-voltage characteristics of the OLEDs based on **Pt3** with different doping concentrations for operating lifetime measurement.

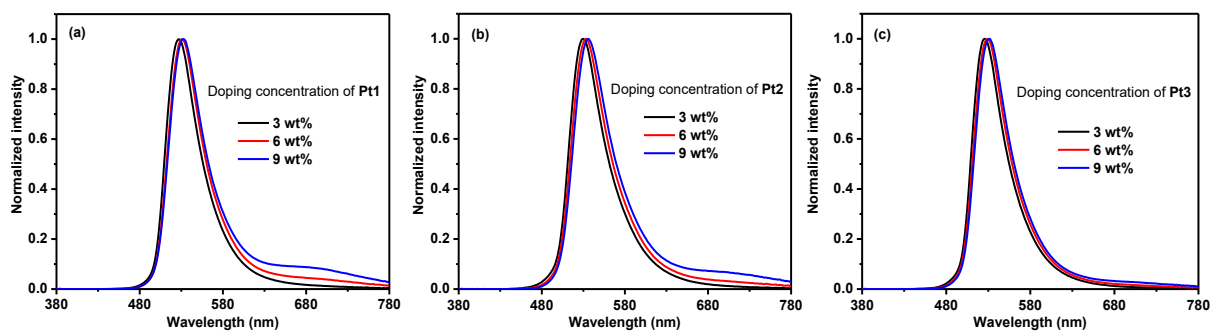

Figure S18. Normalized EL spectra of the OLEDs (at  $1000 \text{ cd m}^{-2}$ ) based on (a) **Pt1**, (b) **Pt2** and (c) **Pt3** with different concentrations for operating lifetime measurement.

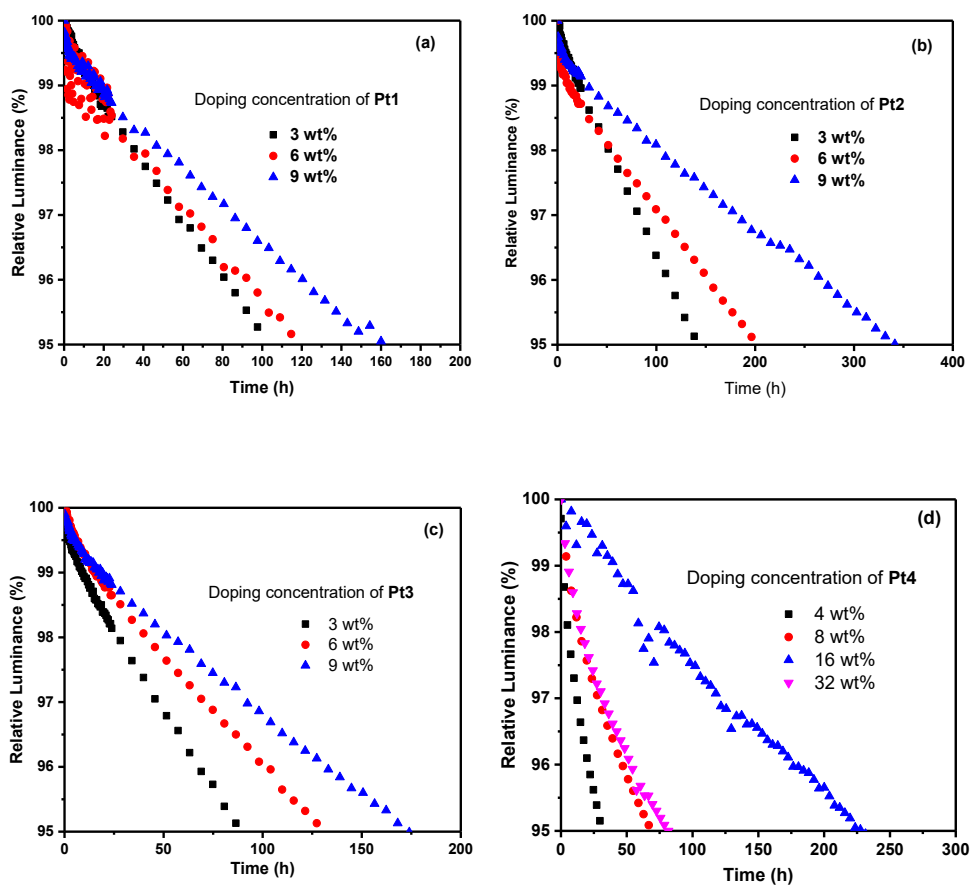

Figure S19. Operational lifetime of the OLEDs based on (a) **Pt1**, (b) **Pt2**, (c) **Pt3** and (d) **Pt4** with different doping concentrations at  $10000 \text{ cd m}^{-2}$ .

Table S3. Electroluminescence data of OLEDs for operating lifetime measurements (data of **Pt4**-devices are given in the manuscript).

| Complex<br>(Conc.) <sup>a</sup> | PE <sup>b</sup> (lm W <sup>-1</sup> ) |                            |                             | CE <sup>c</sup> (cd A <sup>-1</sup> ) |                            |                             | EQE <sup>d</sup> (%)       |                            |                             | CIE (x,y)<br>@1000<br>cd m <sup>-2</sup> |
|---------------------------------|---------------------------------------|----------------------------|-----------------------------|---------------------------------------|----------------------------|-----------------------------|----------------------------|----------------------------|-----------------------------|------------------------------------------|
|                                 | 1000<br>cd m <sup>-2</sup>            | 5000<br>cd m <sup>-2</sup> | 10000<br>cd m <sup>-2</sup> | 1000<br>cd m <sup>-2</sup>            | 5000<br>cd m <sup>-2</sup> | 10000<br>cd m <sup>-2</sup> | 1000<br>cd m <sup>-2</sup> | 5000<br>cd m <sup>-2</sup> | 10000<br>cd m <sup>-2</sup> |                                          |
| <b>Pt1</b><br>(3 wt%)           | 93.6                                  | 75.6                       | 63.6                        | 85.1                                  | 80.6                       | 75.7                        | 22.3                       | 21.1                       | 19.8                        | (0.29,0.66)                              |
| <b>Pt1</b><br>(6 wt%)           | 82.6                                  | 68.1                       | 60.3                        | 77.7                                  | 74.7                       | 71.8                        | 21.4                       | 20.3                       | 19.5                        | (0.32,0.65)                              |
| <b>Pt1</b><br>(9 wt%)           | 71.0                                  | 62.0                       | 53.3                        | 64.5                                  | 64.2                       | 61.9                        | 19.4                       | 18.9                       | 18.0                        | (0.33,0.63)                              |
| <b>Pt2</b><br>(3 wt%)           | 70.5                                  | 53.1                       | 46.1                        | 65.1                                  | 59.1                       | 55.7                        | 17.2                       | 15.6                       | 14.7                        | (0.31,0.64)                              |
| <b>Pt2</b><br>(6 wt%)           | 71.7                                  | 55.1                       | 48.1                        | 66.2                                  | 61.4                       | 58.2                        | 18.1                       | 16.6                       | 15.7                        | (0.33,0.63)                              |
| <b>Pt2</b><br>(9 wt%)           | 61.6                                  | 49.6                       | 42.3                        | 58.8                                  | 56.8                       | 53.9                        | 17.2                       | 16.3                       | 15.3                        | (0.35,0.62)                              |
| <b>Pt3</b><br>(3 wt%)           | 87.5                                  | 71.6                       | 61.7                        | 78.0                                  | 73.0                       | 68.8                        | 20.4                       | 19.1                       | 18.0                        | (0.29,0.66)                              |
| <b>Pt3</b><br>(6 wt%)           | 87.1                                  | 72.5                       | 63.0                        | 77.6                                  | 73.9                       | 70.2                        | 20.5                       | 19.4                       | 18.4                        | (0.30,0.66)                              |
| <b>Pt3</b><br>(9 wt%)           | 84.0                                  | 68.9                       | 60.7                        | 76.4                                  | 73.4                       | 70.5                        | 20.5                       | 19.5                       | 18.7                        | (0.31,0.65)                              |

<sup>a</sup> Doping concentration. <sup>b</sup> Power efficiency. <sup>c</sup> Current efficiency. <sup>d</sup> External quantum efficiency.

## Details for the fabrication of phosphorescent sensitized fluorescent (PSF) devices

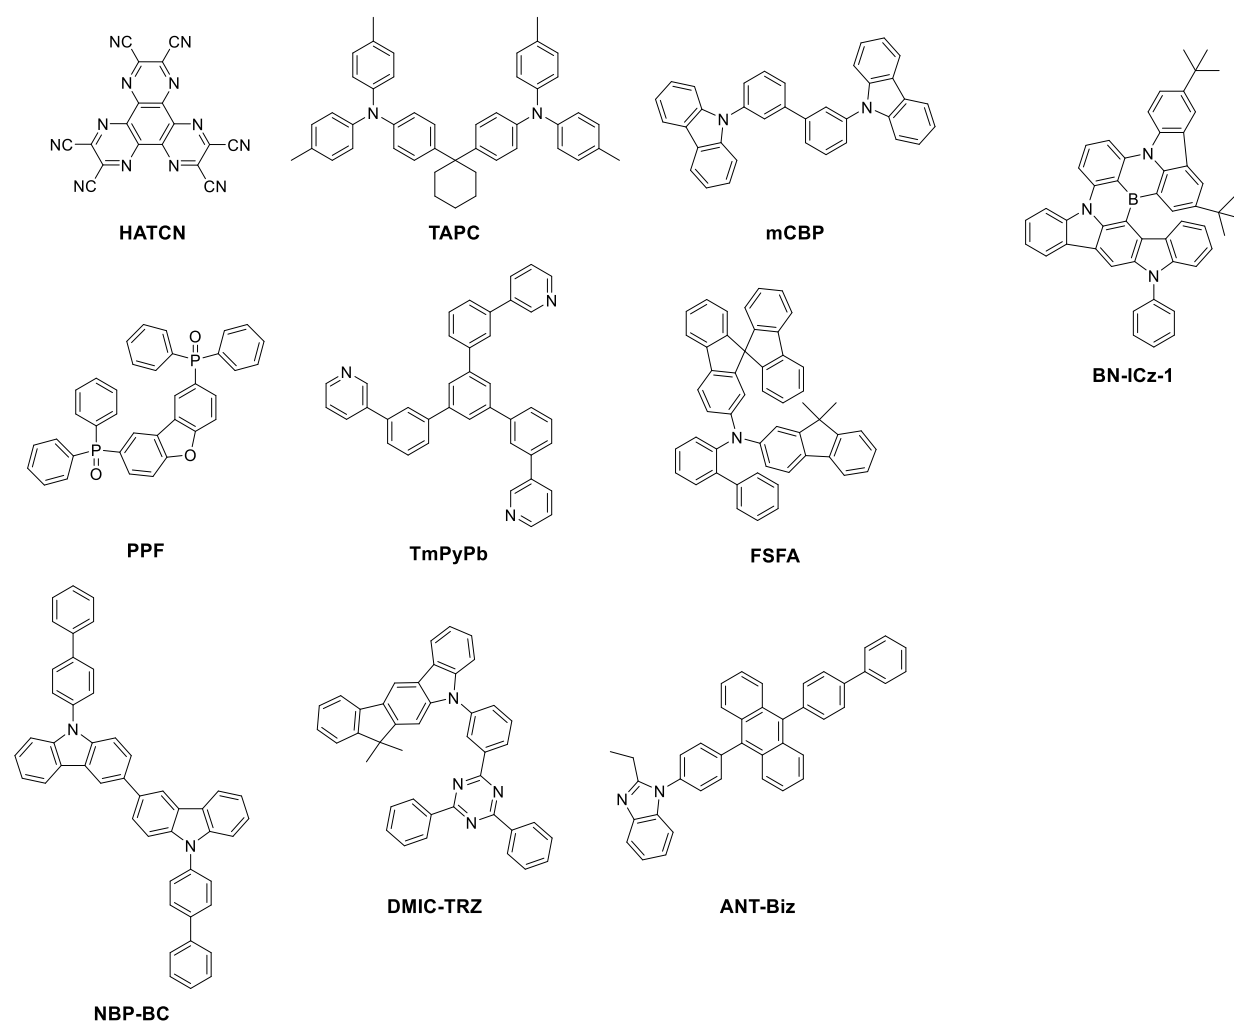

Figure S20. Chemical structures of the organic materials used in the PSF-OLEDs.

Device structure for EQE measurement:

ITO/HAT-CN (5 nm)/TAPC (40 nm)/mCBP(5 nm)/Pt2: **BN-ICz-1**: mCBP (25 nm)/PPF (10 nm)/TmPyPb (40 nm)/LiF (1.2 nm)/Al (100 nm)

Table S4. Electroluminescence data of PSF-OLED and fluorescent OLED for EQE measurement

| Dopant(s)<br>(Conc.) <sup>a</sup>  | PE <sup>b</sup> (lm W <sup>-1</sup> ) |                            |                             | CE <sup>c</sup> (cd A <sup>-1</sup> ) |                            |                             | EQE <sup>d</sup> (%)       |                            |                             | CIE (x,y)<br>@1000<br>cd m <sup>-2</sup> | FWHM<br>(nm) |
|------------------------------------|---------------------------------------|----------------------------|-----------------------------|---------------------------------------|----------------------------|-----------------------------|----------------------------|----------------------------|-----------------------------|------------------------------------------|--------------|
|                                    | 1000<br>cd m <sup>-2</sup>            | 5000<br>cd m <sup>-2</sup> | 10000<br>cd m <sup>-2</sup> | 1000<br>cd m <sup>-2</sup>            | 5000<br>cd m <sup>-2</sup> | 10000<br>cd m <sup>-2</sup> | 1000<br>cd m <sup>-2</sup> | 5000<br>cd m <sup>-2</sup> | 10000<br>cd m <sup>-2</sup> |                                          |              |
| <b>Pt2: BN-ICz-1</b><br>(10:1 wt%) | 92.9                                  | 34.1                       | 16.6                        | 104                                   | 74.4                       | 54.1                        | 30.3                       | 21.2                       | 15.4                        | (0.29,0.67)                              | 29           |
| <b>BN-ICz-1</b><br>(1 wt%)         | 27.8                                  | 4.34                       | 1.54                        | 34.7                                  | 12.4                       | 6.89                        | 9.20                       | 3.45                       | 1.85                        | (0.24,0.66)                              | 23           |

<sup>a</sup> Doping concentration. <sup>b</sup> Power efficiency. <sup>c</sup> Current efficiency. <sup>d</sup> External quantum efficiency.

Device structure for operational lifetime measurement:

ITO/HAT-CN (10 nm)/FSFA (60 nm)/NBP-BC (5 nm)/Pt2: BN-ICz-1: DMIC-TRZ (30 nm)/ANT-Biz (5 nm)/ ANT-Biz: Liq (25 nm)/Liq (2 nm)/Al (100 nm)

Table S5. Electroluminescence data of the PSF-OLED for operating lifetime measurement

| Dopants<br>(Conc.) <sup>a</sup>         | PE <sup>b</sup> (lm W <sup>-1</sup> ) |                            |                             | CE <sup>c</sup> (cd A <sup>-1</sup> ) |                            |                             | EQE <sup>d</sup> (%)       |                            |                             | CIE (x,y)<br>@1000<br>cd m <sup>-2</sup> | FWHM<br>(nm) |
|-----------------------------------------|---------------------------------------|----------------------------|-----------------------------|---------------------------------------|----------------------------|-----------------------------|----------------------------|----------------------------|-----------------------------|------------------------------------------|--------------|
|                                         | 1000<br>cd m <sup>-2</sup>            | 5000<br>cd m <sup>-2</sup> | 10000<br>cd m <sup>-2</sup> | 1000<br>cd m <sup>-2</sup>            | 5000<br>cd m <sup>-2</sup> | 10000<br>cd m <sup>-2</sup> | 1000<br>cd m <sup>-2</sup> | 5000<br>cd m <sup>-2</sup> | 10000<br>cd m <sup>-2</sup> |                                          |              |
| <b>Pt2: BN-<br/>ICz-1</b><br>(10:1 wt%) | 98.9                                  | 76.8                       | 36.9                        | 78.7                                  | 74.3                       | 57.2                        | 23.3                       | 22.0                       | 16.4                        | (0.30,0.66)                              | 29           |

<sup>a</sup> Doping concentration. <sup>b</sup> Power efficiency. <sup>c</sup> Current efficiency. <sup>d</sup> External quantum efficiency.

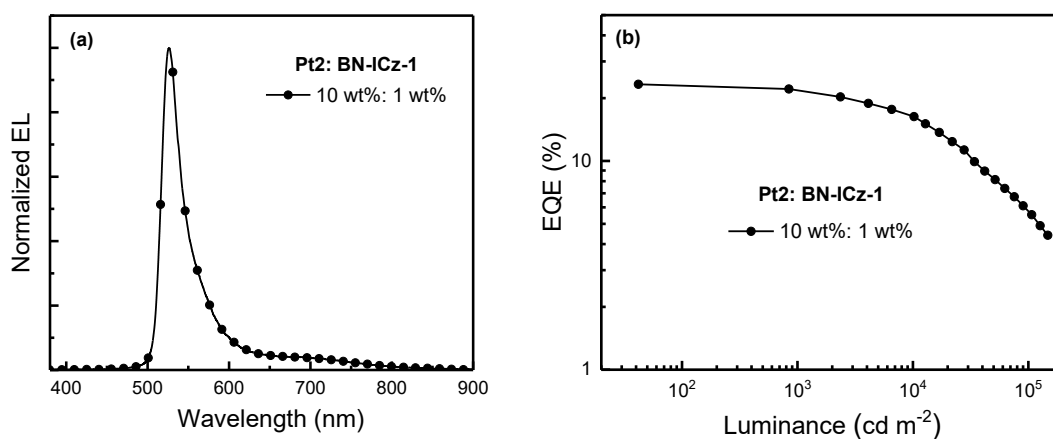

Figure S21. (a) Normalized EL spectra and (b) EQE-luminance characteristics of the PSF-OLED for operating lifetime measurement.

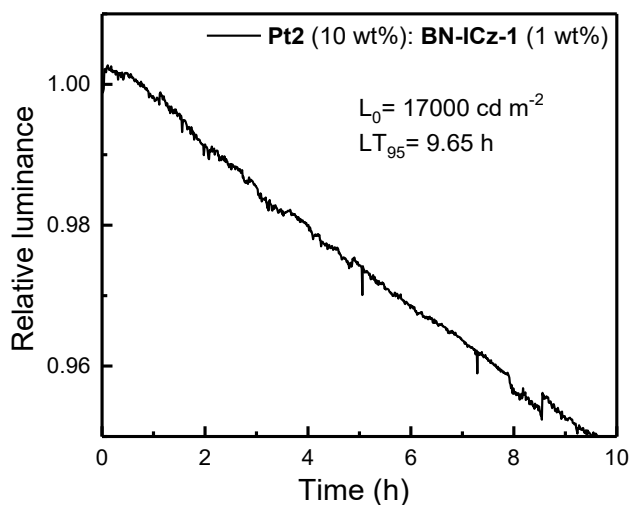

Figure S22. Operational lifetime of the PSF-OLED at an initial luminance of 17000 cd m<sup>-2</sup>.

## References

- [S1] T.-L. Lam, H. Li, K. Tan, Z. Chen, Y.-K. Tang, J. Yang, G. Cheng, L. Dai, C.-M. Che, *Small*, **2023**, *20*, 2307393.
- [S2] M. J. Frisch, et al. Gaussian16, Revision C.01, Gaussian Inc., Wallingford, CT, USA, **2016**.
- [S3] D. Andrae, U. Häußermann, M. Dolg, H. Stoll, H. Preuß, *Theor. Chim. Acta* **1990**, *77*, 123–141.
- [S4] A. V. Marenich, C. J. Cramer, D. G. Truhlar, *J. Phys. Chem. B* **2009**, *113*, 6378–6396.
- [S5] B. de Souza, G. Farias, F. Neese, R. Izsák, *J. Chem. Theory Comput.* **2019**, *15*, 1896–1904.
- [S6] E. van Lenthe, J. G. Snijders, E. J. Baerends, *J. Chem. Phys.* **1996**, *105*, 6505–6516.
- [S7] D. A. Pantazis, X.-Y. Chen, C. R. Landis, F. Neese, *J. Chem. Theory Comput.* **2008**, *4*, 908–919.
- [S8] M. Bühl, C. Reimann, D. A. Pantazis, T. Bredow, F. Neese, *J. Chem. Theory Comput.* **2008**, *4*, 1449–1459.
- [S9] F. Neese, F. Wennmohs, U. Becker, C. Riplinger, *J. Chem. Phys.* **2020**, *152*, 224108.
- [S10] J. M. Younker, K. D. Dobbs, *J. Phys. Chem. C* **2013**, *117*, 25714–25723.
- [S11] M. Cohen, R. P. McEachran, *Chem. Phys. Lett.* **1972**, *14*, 201–204.
- [S12] S. J. Strickler, R. A. Berg, *J. Chem. Phys.* **1962**, *37*, 814–821.

## Cartesian Coordinates of Optimized Ground-State Structures

### Pt1

|    |           |           |           |
|----|-----------|-----------|-----------|
| Pt | -0.344751 | -1.295095 | -0.328526 |
| N  | 1.556950  | -0.780972 | -0.017567 |
| N  | -2.340574 | -1.230544 | -0.733559 |
| O  | -0.039602 | -3.303638 | -0.040087 |
| C  | 1.063107  | -3.760305 | 0.482136  |
| C  | 1.037439  | -5.131283 | 0.858337  |
| H  | 0.114939  | -5.662592 | 0.643565  |
| C  | 2.090799  | -5.755178 | 1.482620  |
| H  | 2.010634  | -6.802043 | 1.764781  |
| C  | 3.252546  | -5.027638 | 1.775565  |
| H  | 4.079075  | -5.484967 | 2.309955  |
| C  | 3.324201  | -3.707482 | 1.388148  |
| C  | 2.284008  | -3.030726 | 0.704075  |
| C  | 2.555279  | -1.640734 | 0.298878  |
| C  | 3.877471  | -1.159028 | 0.246075  |
| C  | 4.166586  | 0.174645  | -0.007339 |
| C  | 3.094609  | 1.049663  | -0.228378 |
| H  | 3.270500  | 2.097547  | -0.443612 |
| C  | 1.806600  | 0.557749  | -0.256625 |
| C  | 0.610298  | 1.351676  | -0.567400 |
| C  | 0.485495  | 2.722885  | -0.806008 |
| C  | -0.774405 | 3.255501  | -1.104292 |
| H  | -0.865708 | 4.323242  | -1.278844 |
| C  | -1.918045 | 2.454570  | -1.190094 |
| C  | -1.799289 | 1.080012  | -0.965966 |
| C  | -0.542033 | 0.563106  | -0.641281 |
| C  | -2.819873 | 0.031058  | -0.997418 |
| C  | -4.174696 | 0.225978  | -1.219552 |
| H  | -4.536521 | 1.229818  | -1.412846 |
| C  | -5.067567 | -0.842844 | -1.144626 |
| C  | -4.548438 | -2.117320 | -0.902382 |
| H  | -5.201791 | -2.978732 | -0.820266 |
| C  | -3.186009 | -2.266147 | -0.703711 |
| H  | -2.736007 | -3.229636 | -0.488139 |
| H  | 4.697577  | -1.843275 | 0.411632  |
| H  | 4.214981  | -3.153589 | 1.662261  |

|   |           |           |           |
|---|-----------|-----------|-----------|
| H | 1.345655  | 3.386582  | -0.762893 |
| H | -2.876643 | 2.911734  | -1.425206 |
| C | -6.520897 | -0.613576 | -1.270965 |
| C | -7.283610 | -1.357557 | -2.175695 |
| C | -7.159472 | 0.360702  | -0.478397 |
| C | -8.641372 | -1.108593 | -2.339373 |
| C | -8.523408 | 0.606332  | -0.648643 |
| C | -9.257972 | -0.114122 | -1.582561 |
| H | -9.214406 | -1.683076 | -3.060705 |
| H | -8.998785 | 1.359577  | -0.027671 |
| C | 5.562226  | 0.656164  | -0.047406 |
| C | 5.882285  | 1.926379  | 0.451835  |
| C | 6.572302  | -0.144793 | -0.576077 |
| C | 7.191897  | 2.394364  | 0.432469  |
| H | 5.092114  | 2.530167  | 0.884044  |
| C | 7.900645  | 0.292971  | -0.612726 |
| H | 6.311705  | -1.114421 | -0.990504 |
| C | 8.183024  | 1.559337  | -0.104628 |
| H | 9.206297  | 1.917783  | -0.122271 |
| C | 8.975364  | -0.618100 | -1.207539 |
| C | 8.640810  | -0.899008 | -2.679672 |
| H | 7.669531  | -1.391063 | -2.789396 |
| H | 8.613083  | 0.029515  | -3.259593 |
| H | 9.398387  | -1.555046 | -3.123137 |
| C | 10.369166 | 0.007332  | -1.140291 |
| H | 10.675112 | 0.212403  | -0.108740 |
| H | 11.101752 | -0.683629 | -1.569945 |
| H | 10.425820 | 0.941677  | -1.709042 |
| C | 9.002696  | -1.942307 | -0.430025 |
| H | 9.234067  | -1.772320 | 0.626808  |
| H | 8.043284  | -2.466166 | -0.483182 |
| H | 9.767702  | -2.609466 | -0.842901 |
| C | 7.583880  | 3.767312  | 0.980216  |
| C | 8.587046  | 3.586685  | 2.128901  |
| H | 9.495532  | 3.073496  | 1.798833  |
| H | 8.882851  | 4.561652  | 2.532574  |
| H | 8.148501  | 3.000294  | 2.943142  |
| C | 6.378727  | 4.544539  | 1.511634  |
| H | 5.632813  | 4.724388  | 0.729839  |



|   |            |           |           |
|---|------------|-----------|-----------|
| H | 5.889376   | 4.023310  | 2.341281  |
| H | 6.706790   | 5.520346  | 1.884347  |
| C | 8.233702   | 4.592931  | -0.139812 |
| H | 8.523139   | 5.580841  | 0.235966  |
| H | 9.133974   | 4.110792  | -0.532879 |
| H | 7.539396   | 4.736559  | -0.974432 |
| H | -10.318431 | 0.086546  | -1.703435 |
| C | -5.773483  | 0.307999  | 1.515866  |
| C | -6.360352  | 2.462915  | 0.467711  |
| C | -6.377154  | -0.847120 | 2.021789  |
| C | -6.449365  | 3.128990  | -0.764088 |
| C | -5.696895  | -1.650850 | 2.930974  |
| H | -7.374882  | -1.116918 | 1.689330  |
| C | -3.821446  | -0.148388 | 2.866338  |
| C | -6.366414  | 4.516032  | -0.820602 |
| H | -6.593276  | 2.556398  | -1.675210 |
| C | -6.101214  | 4.605536  | 1.562915  |
| C | -4.416638  | -1.309791 | 3.357205  |
| H | -6.177160  | -2.548515 | 3.310329  |
| H | -2.816667  | 0.123789  | 3.176490  |
| C | -6.184515  | 5.265555  | 0.338209  |
| H | -6.438185  | 5.010876  | -1.785240 |
| H | -5.972324  | 5.173909  | 2.479870  |
| H | -3.884470  | -1.941715 | 4.061543  |
| H | -6.113131  | 6.347679  | 0.289588  |
| N | -6.436167  | 1.062920  | 0.520125  |
| H | -6.789568  | -2.112512 | -2.781096 |
| C | -4.488522  | 0.655808  | 1.951141  |
| H | -4.005238  | 1.541329  | 1.551937  |
| C | -6.196279  | 3.221939  | 1.635426  |
| H | -6.142556  | 2.721432  | 2.596417  |

## **Pt2**

|    |           |          |           |
|----|-----------|----------|-----------|
| Pt | -0.479360 | 1.449144 | -0.578381 |
| N  | 1.455259  | 0.966821 | -0.591391 |
| N  | -2.513217 | 1.349973 | -0.631732 |
| O  | -0.169982 | 3.434131 | -0.157833 |
| C  | 1.010689  | 3.977131 | -0.250543 |
| C  | 1.036627  | 5.396827 | -0.177168 |

|   |           |           |           |
|---|-----------|-----------|-----------|
| H | 0.076474  | 5.879229  | -0.019469 |
| C | 2.188133  | 6.132256  | -0.325102 |
| H | 2.147809  | 7.217683  | -0.278297 |
| C | 3.403784  | 5.476354  | -0.562943 |
| H | 4.318126  | 6.036400  | -0.730915 |
| C | 3.418995  | 4.099149  | -0.598673 |
| C | 2.268154  | 3.294678  | -0.408378 |
| C | 2.475810  | 1.836238  | -0.395586 |
| C | 3.761746  | 1.302752  | -0.186466 |
| C | 4.019562  | -0.057975 | -0.278958 |
| C | 2.949661  | -0.910962 | -0.580384 |
| H | 3.098346  | -1.982662 | -0.647801 |
| C | 1.677687  | -0.392982 | -0.706834 |
| C | 0.462813  | -1.190704 | -0.919724 |
| C | 0.319512  | -2.569898 | -1.093819 |
| C | -0.963225 | -3.115371 | -1.224816 |
| H | -1.068432 | -4.188064 | -1.356322 |
| C | -2.115597 | -2.324633 | -1.174516 |
| C | -1.980500 | -0.944077 | -1.004005 |
| C | -0.695135 | -0.407204 | -0.892163 |
| C | -3.008139 | 0.087438  | -0.858683 |
| C | -4.378811 | -0.125824 | -0.892287 |
| H | -4.744511 | -1.127543 | -1.085792 |
| C | -5.267207 | 0.921448  | -0.648367 |
| C | -4.733954 | 2.198488  | -0.442876 |
| H | -5.377855 | 3.046982  | -0.239016 |
| C | -3.360138 | 2.368431  | -0.448108 |
| H | -2.897607 | 3.335183  | -0.278002 |
| H | 4.578209  | 1.968963  | 0.053081  |
| H | 4.362611  | 3.615464  | -0.825037 |
| H | 1.183023  | -3.230300 | -1.122134 |
| H | -3.091796 | -2.796621 | -1.251855 |
| C | -6.724255 | 0.687115  | -0.565956 |
| C | -7.615498 | 1.536731  | -1.229349 |
| C | -7.253107 | -0.378561 | 0.189089  |
| C | -8.987213 | 1.315571  | -1.183725 |
| C | -8.628710 | -0.592571 | 0.239926  |
| C | -9.495582 | 0.244096  | -0.454796 |
| H | -9.658109 | 1.978058  | -1.722081 |

|   |            |           |           |
|---|------------|-----------|-----------|
| H | -9.005396  | -1.412533 | 0.843634  |
| C | 5.378186   | -0.592152 | -0.055508 |
| C | 5.838419   | -1.682168 | -0.807197 |
| C | 6.213988   | -0.020421 | 0.901602  |
| C | 7.117171   | -2.194766 | -0.615814 |
| H | 5.187826   | -2.103698 | -1.565424 |
| C | 7.505412   | -0.510639 | 1.123140  |
| H | 5.838248   | 0.802621  | 1.502397  |
| C | 7.931409   | -1.592057 | 0.354647  |
| H | 8.929290   | -1.987541 | 0.508416  |
| C | 8.383973   | 0.142061  | 2.191350  |
| C | 7.699820   | 0.005985  | 3.559454  |
| H | 6.719205   | 0.491415  | 3.574210  |
| H | 7.555935   | -1.047156 | 3.822922  |
| H | 8.313425   | 0.471340  | 4.339166  |
| C | 9.767876   | -0.502739 | 2.277943  |
| H | 10.317252  | -0.418657 | 1.334048  |
| H | 10.359292  | 0.001294  | 3.049259  |
| H | 9.708725   | -1.562189 | 2.549379  |
| C | 8.565208   | 1.630415  | 1.858770  |
| H | 9.044870   | 1.759234  | 0.882743  |
| H | 7.609280   | 2.162822  | 1.835657  |
| H | 9.195027   | 2.114107  | 2.613883  |
| C | 7.661406   | -3.374410 | -1.422641 |
| C | 8.914660   | -2.929280 | -2.190473 |
| H | 9.702712   | -2.579904 | -1.516203 |
| H | 9.320574   | -3.764371 | -2.772595 |
| H | 8.680776   | -2.113932 | -2.883049 |
| C | 6.642222   | -3.904931 | -2.431753 |
| H | 5.731242   | -4.264180 | -1.940910 |
| H | 6.360313   | -3.143165 | -3.166375 |
| H | 7.074032   | -4.747918 | -2.980985 |
| C | 8.029750   | -4.515832 | -0.463313 |
| H | 8.424534   | -5.370713 | -1.023917 |
| H | 8.793253   | -4.211133 | 0.259094  |
| H | 7.152939   | -4.853619 | 0.099180  |
| H | -10.565973 | 0.067239  | -0.413140 |
| H | -7.217175  | 2.359619  | -1.816094 |
| C | -6.097134  | -2.550303 | 0.542257  |

|   |           |           |           |
|---|-----------|-----------|-----------|
| C | -5.508089 | -0.850415 | 1.909130  |
| C | -6.669196 | -3.332028 | -0.459744 |
| C | -5.007528 | -3.009962 | 1.320258  |
| C | -5.409571 | 0.375739  | 2.562532  |
| C | -4.630987 | -1.921569 | 2.193185  |
| C | -6.142603 | -4.603484 | -0.660083 |
| H | -7.491903 | -2.960467 | -1.062403 |
| C | -4.499291 | -4.291590 | 1.098636  |
| C | -4.396497 | 0.520357  | 3.501908  |
| H | -6.090478 | 1.189987  | 2.337336  |
| C | -3.623055 | -1.751286 | 3.144954  |
| C | -5.072599 | -5.082198 | 0.110168  |
| H | -6.569318 | -5.236247 | -1.432932 |
| H | -3.658799 | -4.656921 | 1.681727  |
| C | -3.509508 | -0.527707 | 3.790524  |
| H | -4.287484 | 1.468465  | 4.020361  |
| H | -2.932918 | -2.560251 | 3.366351  |
| H | -4.685962 | -6.080072 | -0.073694 |
| H | -2.724432 | -0.375847 | 4.524774  |
| N | -6.396690 | -1.243657 | 0.913248  |

### **Pt3**

|    |           |           |           |
|----|-----------|-----------|-----------|
| Pt | -0.470134 | 1.337315  | -0.597806 |
| N  | 1.481079  | 0.926748  | -0.611436 |
| N  | -2.498897 | 1.163215  | -0.662007 |
| O  | -0.235925 | 3.317938  | -0.110665 |
| C  | 0.924031  | 3.906606  | -0.182377 |
| C  | 0.897904  | 5.323509  | -0.066728 |
| H  | -0.079562 | 5.765598  | 0.102354  |
| C  | 2.021868  | 6.104736  | -0.190242 |
| H  | 1.941493  | 7.186117  | -0.111852 |
| C  | 3.261257  | 5.501308  | -0.444001 |
| H  | 4.154552  | 6.099303  | -0.593378 |
| C  | 3.327198  | 4.127125  | -0.519096 |
| C  | 2.206337  | 3.276039  | -0.355438 |
| C  | 2.467761  | 1.826608  | -0.383045 |
| C  | 3.771208  | 1.335076  | -0.179525 |
| C  | 4.079597  | -0.012154 | -0.309117 |
| C  | 3.043469  | -0.894520 | -0.642366 |

|   |           |           |           |
|---|-----------|-----------|-----------|
| H | 3.231359  | -1.957717 | -0.739459 |
| C | 1.754089  | -0.420105 | -0.763310 |
| C | 0.570807  | -1.255393 | -1.006801 |
| C | 0.478755  | -2.634918 | -1.211394 |
| C | -0.782401 | -3.223941 | -1.360813 |
| H | -0.847897 | -4.297280 | -1.511367 |
| C | -1.963207 | -2.476701 | -1.301115 |
| C | -1.878913 | -1.095892 | -1.103823 |
| C | -0.614890 | -0.515159 | -0.969947 |
| C | -2.944601 | -0.108082 | -0.934074 |
| C | -4.307018 | -0.370940 | -0.976017 |
| H | -4.638604 | -1.378884 | -1.197064 |
| C | -5.233439 | 0.627722  | -0.680206 |
| C | -4.749535 | 1.914575  | -0.423678 |
| H | -5.422347 | 2.727920  | -0.177707 |
| C | -3.383634 | 2.139661  | -0.433813 |
| H | -2.958002 | 3.116254  | -0.227695 |
| H | 4.560552  | 2.024139  | 0.085262  |
| H | 4.288179  | 3.684706  | -0.756756 |
| H | 1.365902  | -3.262855 | -1.246377 |
| H | -2.921664 | -2.982329 | -1.387278 |
| C | -6.673129 | 0.295226  | -0.554184 |
| C | -7.661283 | 0.941555  | -1.319226 |
| C | -7.055537 | -0.706729 | 0.360133  |
| C | -8.993768 | 0.550615  | -1.160374 |
| C | -8.389324 | -1.072933 | 0.508572  |
| C | -9.360070 | -0.444257 | -0.261761 |
| H | -9.755670 | 1.036357  | -1.764287 |
| H | -8.647113 | -1.839592 | 1.232270  |
| C | 5.455194  | -0.503459 | -0.090686 |
| C | 5.958376  | -1.556305 | -0.867529 |
| C | 6.264164  | 0.070760  | 0.887731  |
| C | 7.252674  | -2.029601 | -0.679747 |
| H | 5.328512  | -1.979250 | -1.642182 |
| C | 7.570371  | -0.380230 | 1.106037  |
| H | 5.856085  | 0.863845  | 1.507464  |
| C | 8.039092  | -1.425160 | 0.312368  |
| H | 9.049259  | -1.789526 | 0.462995  |
| C | 8.417599  | 0.272939  | 2.199012  |

|   |            |           |           |
|---|------------|-----------|-----------|
| C | 7.728615   | 0.074536  | 3.557086  |
| H | 6.731244   | 0.524376  | 3.577229  |
| H | 7.620267   | -0.990008 | 3.790000  |
| H | 8.319580   | 0.539174  | 4.354507  |
| C | 9.822723   | -0.325071 | 2.279502  |
| H | 10.375557  | -0.195893 | 1.342783  |
| H | 10.390347  | 0.178036  | 3.069078  |
| H | 9.798970   | -1.393003 | 2.521491  |
| C | 8.548376   | 1.775417  | 1.909006  |
| H | 9.032500   | 1.947828  | 0.941949  |
| H | 7.574123   | 2.273592  | 1.889824  |
| H | 9.153045   | 2.260451  | 2.683561  |
| C | 7.842504   | -3.168511 | -1.512639 |
| C | 9.081856   | -2.659155 | -2.262854 |
| H | 9.853343   | -2.297952 | -1.575791 |
| H | 9.520812   | -3.464119 | -2.863160 |
| H | 8.821255   | -1.835933 | -2.936308 |
| C | 6.847389   | -3.710781 | -2.539435 |
| H | 5.947476   | -4.113292 | -2.061926 |
| H | 6.542003   | -2.942437 | -3.257624 |
| H | 7.311349   | -4.524809 | -3.105864 |
| C | 8.248061   | -4.319256 | -0.579869 |
| H | 8.676735   | -5.144741 | -1.159319 |
| H | 8.996380   | -4.005056 | 0.154211  |
| H | 7.381589   | -4.702984 | -0.030982 |
| H | -10.403394 | -0.726268 | -0.157282 |
| C | -5.574621  | -2.635295 | 0.875574  |
| C | -5.241821  | -0.751940 | 2.075271  |
| C | -6.035278  | -3.582736 | -0.036742 |
| C | -4.413015  | -2.849066 | 1.655912  |
| C | -5.334266  | 0.524699  | 2.624143  |
| C | -4.200636  | -1.642819 | 2.423316  |
| C | -5.318521  | -4.770139 | -0.144885 |
| H | -6.918993  | -3.398516 | -0.639630 |
| C | -3.713329  | -4.050397 | 1.527483  |
| C | -4.346708  | 0.907812  | 3.523136  |
| H | -6.142814  | 1.195369  | 2.351816  |
| C | -3.221531  | -1.233676 | 3.331334  |
| C | -4.172609  | -5.005764 | 0.628998  |

|   |           |           |           |
|---|-----------|-----------|-----------|
| H | -5.655568 | -5.528833 | -0.845425 |
| H | -2.813888 | -4.227073 | 2.110150  |
| C | -3.298784 | 0.042921  | 3.872066  |
| H | -4.386103 | 1.900847  | 3.961354  |
| H | -2.407536 | -1.900344 | 3.601017  |
| H | -3.635810 | -5.943082 | 0.517892  |
| H | -2.539456 | 0.378973  | 4.571379  |
| N | -6.070942 | -1.364576 | 1.142137  |
| C | -7.316040 | 2.008653  | -2.319548 |
| H | -7.195611 | 2.986998  | -1.840480 |
| H | -6.382355 | 1.790178  | -2.844712 |
| H | -8.111158 | 2.107829  | -3.063034 |

#### **Pt4**

|    |           |           |           |
|----|-----------|-----------|-----------|
| Pt | 0.343174  | -0.921328 | -0.102441 |
| N  | 2.319384  | -0.811858 | 0.141712  |
| N  | -1.643366 | -0.473488 | -0.142214 |
| O  | 0.372226  | -2.771357 | -0.989702 |
| C  | 1.434168  | -3.525211 | -0.964617 |
| C  | 1.238404  | -4.868687 | -1.387299 |
| H  | 0.234118  | -5.118235 | -1.716715 |
| C  | 2.234984  | -5.814445 | -1.357447 |
| H  | 2.025132  | -6.833005 | -1.674446 |
| C  | 3.509743  | -5.464113 | -0.891524 |
| H  | 4.299683  | -6.204242 | -0.813244 |
| C  | 3.743207  | -4.159806 | -0.514042 |
| C  | 2.762567  | -3.138280 | -0.567049 |
| C  | 3.202051  | -1.780051 | -0.203941 |
| C  | 4.571568  | -1.452710 | -0.196797 |
| C  | 5.033107  | -0.221611 | 0.248146  |
| C  | 4.088601  | 0.715391  | 0.687540  |
| H  | 4.397344  | 1.696964  | 1.028899  |
| C  | 2.744139  | 0.419755  | 0.604484  |
| C  | 1.658325  | 1.351139  | 0.936533  |
| C  | 1.722334  | 2.656171  | 1.432306  |
| C  | 0.537530  | 3.379355  | 1.615365  |
| H  | 0.594108  | 4.395422  | 1.994158  |
| C  | -0.716457 | 2.841558  | 1.307528  |
| C  | -0.788638 | 1.534938  | 0.817129  |

|   |           |           |           |
|---|-----------|-----------|-----------|
| C | 0.398350  | 0.816347  | 0.651194  |
| C | -1.948476 | 0.764041  | 0.370030  |
| C | -3.267256 | 1.194276  | 0.402758  |
| H | -3.489781 | 2.164456  | 0.831902  |
| C | -4.283010 | 0.403226  | -0.128612 |
| C | -3.944523 | -0.850881 | -0.645119 |
| H | -4.694078 | -1.507424 | -1.071620 |
| C | -2.620398 | -1.252151 | -0.620301 |
| H | -2.304452 | -2.216639 | -1.003445 |
| H | 5.291643  | -2.178972 | -0.546276 |
| H | 4.724405  | -3.922083 | -0.118665 |
| H | 2.673919  | 3.126122  | 1.669564  |
| H | -1.606701 | 3.452643  | 1.434418  |
| C | -5.674319 | 0.905807  | -0.172341 |
| C | -6.741142 | 0.158397  | 0.354585  |
| C | -5.966568 | 2.153089  | -0.756502 |
| C | -8.049130 | 0.637873  | 0.295265  |
| C | -7.274708 | 2.625994  | -0.818805 |
| C | -8.315398 | 1.867930  | -0.293336 |
| H | -8.844495 | 0.040913  | 0.730058  |
| H | -7.460786 | 3.583561  | -1.294673 |
| C | 6.475799  | 0.094880  | 0.247361  |
| C | 7.029553  | 0.859709  | 1.283336  |
| C | 7.298614  | -0.362367 | -0.779822 |
| C | 8.386994  | 1.162671  | 1.302917  |
| H | 6.383664  | 1.188269  | 2.090014  |
| C | 8.667836  | -0.075204 | -0.794726 |
| H | 6.855875  | -0.928071 | -1.594593 |
| C | 9.185021  | 0.684127  | 0.252947  |
| H | 10.244013 | 0.917138  | 0.261450  |
| C | 9.530309  | -0.588729 | -1.948639 |
| C | 9.018097  | 0.010584  | -3.266589 |
| H | 7.976983  | -0.264287 | -3.461627 |
| H | 9.077636  | 1.103938  | -3.249304 |
| H | 9.620993  | -0.349955 | -4.107754 |
| C | 11.002804 | -0.209218 | -1.786833 |
| H | 11.433511 | -0.626248 | -0.870091 |
| H | 11.577948 | -0.604446 | -2.630486 |
| H | 11.145866 | 0.876582  | -1.771709 |



|   |           |           |           |
|---|-----------|-----------|-----------|
| C | 9.431165  | -2.119933 | -2.012882 |
| H | 9.785711  | -2.575677 | -1.082339 |
| H | 8.403007  | -2.455463 | -2.180089 |
| H | 10.043439 | -2.505883 | -2.835659 |
| C | 9.030955  | 1.983635  | 2.421141  |
| C | 10.109665 | 1.139049  | 3.114979  |
| H | 10.896896 | 0.831238  | 2.419838  |
| H | 10.582605 | 1.713129  | 3.919826  |
| H | 9.676789  | 0.233341  | 3.552542  |
| C | 8.014139  | 2.424129  | 3.475026  |
| H | 7.227714  | 3.053555  | 3.044656  |
| H | 7.539594  | 1.568938  | 3.967851  |
| H | 8.518740  | 3.011373  | 4.249162  |
| C | 9.675866  | 3.240828  | 1.819265  |
| H | 10.145212 | 3.840941  | 2.607043  |
| H | 10.449346 | 2.992190  | 1.086175  |
| H | 8.927519  | 3.863540  | 1.317748  |
| H | -9.334492 | 2.238210  | -0.339778 |
| C | -4.366895 | 4.049193  | -0.672806 |
| C | -4.092394 | 2.561631  | -2.352085 |
| C | -4.804124 | 4.722120  | 0.466227  |
| C | -3.170305 | 4.402841  | -1.340615 |
| C | -4.228566 | 1.494157  | -3.235652 |
| C | -2.996489 | 3.451711  | -2.415136 |
| C | -4.026281 | 5.781474  | 0.922333  |
| H | -5.715474 | 4.428953  | 0.978184  |
| C | -2.410210 | 5.471828  | -0.862401 |
| C | -3.230721 | 1.320637  | -4.186723 |
| H | -5.075119 | 0.817797  | -3.175587 |
| C | -2.009394 | 3.257616  | -3.383788 |
| C | -2.844793 | 6.156536  | 0.266163  |
| H | -4.342096 | 6.326823  | 1.807003  |
| H | -1.484757 | 5.751854  | -1.357210 |
| C | -2.131711 | 2.189122  | -4.261771 |
| H | -3.302746 | 0.490740  | -4.883580 |
| H | -1.154829 | 3.925636  | -3.440229 |
| H | -2.261188 | 6.987836  | 0.649945  |
| H | -1.367046 | 2.018649  | -5.013251 |
| N | -4.922272 | 2.939445  | -1.300730 |

|   |           |           |           |
|---|-----------|-----------|-----------|
| N | -6.491724 | -1.088044 | 0.970095  |
| C | -5.707178 | -1.299266 | 2.099036  |
| C | -6.898561 | -2.319473 | 0.469867  |
| C | -5.092751 | -0.365832 | 2.930363  |
| C | -5.604218 | -2.690162 | 2.329601  |
| C | -7.661901 | -2.599327 | -0.661800 |
| C | -6.366148 | -3.343221 | 1.288888  |
| C | -4.346752 | -0.851869 | 3.996704  |
| H | -5.188389 | 0.699682  | 2.749418  |
| C | -4.852380 | -3.151796 | 3.412411  |
| C | -7.904554 | -3.936637 | -0.954949 |
| H | -8.052977 | -1.803884 | -1.288503 |
| C | -6.626823 | -4.677519 | 0.970814  |
| C | -4.223471 | -2.228351 | 4.236449  |
| H | -3.847224 | -0.148448 | 4.656349  |
| H | -4.758220 | -4.217144 | 3.602612  |
| C | -7.397378 | -4.965562 | -0.148578 |
| H | -8.498433 | -4.186926 | -1.829286 |
| H | -6.226335 | -5.477572 | 1.586946  |
| H | -3.628182 | -2.572653 | 5.076513  |
| H | -7.606391 | -5.999196 | -0.407082 |

### Cartesian Coordinates of Optimized T<sub>1</sub> State Structures

#### Pt1

|    |             |             |             |
|----|-------------|-------------|-------------|
| Pt | -0.31287200 | -1.33875200 | -0.32851600 |
| N  | 1.57390200  | -0.82644100 | -0.00571400 |
| N  | -2.31918100 | -1.29262500 | -0.68585000 |
| O  | 0.10515300  | -3.36983500 | -0.14799400 |
| C  | 1.20463600  | -3.84462700 | 0.31887600  |
| C  | 1.19253300  | -5.25354600 | 0.56919400  |
| H  | 0.28478800  | -5.77436000 | 0.28227700  |
| C  | 2.24255900  | -5.90005500 | 1.17620600  |
| H  | 2.20282800  | -6.96622200 | 1.37269900  |
| C  | 3.34973900  | -5.13776800 | 1.56732200  |
| H  | 4.17726800  | -5.60693600 | 2.09052900  |
| C  | 3.40708700  | -3.76927700 | 1.30476700  |
| C  | 2.40332800  | -3.07259100 | 0.62121700  |
| C  | 2.63594100  | -1.66357600 | 0.26201500  |
| C  | 3.92889400  | -1.16379500 | 0.21914400  |

|   |             |             |             |
|---|-------------|-------------|-------------|
| C | 4.21351700  | 0.19902300  | 0.01284600  |
| C | 3.09197800  | 1.04942700  | -0.13065800 |
| H | 3.22727400  | 2.11361800  | -0.29277100 |
| C | 1.81684700  | 0.54693300  | -0.15435100 |
| C | 0.59919200  | 1.32987900  | -0.38781300 |
| C | 0.43304100  | 2.71091000  | -0.52039600 |
| C | -0.84375900 | 3.23517800  | -0.76031900 |
| H | -0.95761400 | 4.31144400  | -0.85148500 |
| C | -1.97634800 | 2.42344000  | -0.88984400 |
| C | -1.82250200 | 1.03930100  | -0.76919600 |
| C | -0.54847400 | 0.53460500  | -0.50856500 |
| C | -2.82710700 | -0.02301000 | -0.86335700 |
| C | -4.17943900 | 0.16870800  | -1.07448000 |
| H | -4.54804400 | 1.17861600  | -1.21263800 |
| C | -5.06692100 | -0.91360800 | -1.08001300 |
| C | -4.52221400 | -2.19309700 | -0.91983700 |
| H | -5.15938400 | -3.07050700 | -0.89931200 |
| C | -3.15999000 | -2.33764300 | -0.72981500 |
| H | -2.70697000 | -3.31211800 | -0.58303900 |
| H | 4.75500500  | -1.84613900 | 0.37291900  |
| H | 4.27370400  | -3.22528400 | 1.65969100  |
| H | 1.27730100  | 3.39058600  | -0.43510900 |
| H | -2.94621200 | 2.87724300  | -1.07889200 |
| C | -6.51758200 | -0.70548800 | -1.22616900 |
| C | -7.25879900 | -1.50460500 | -2.10539700 |
| C | -7.19152900 | 0.29378800  | -0.49254600 |
| C | -8.61780000 | -1.29300100 | -2.29967500 |
| C | -8.55733100 | 0.50230500  | -0.69461400 |
| C | -9.26630500 | -0.27603400 | -1.60099900 |
| H | -9.16710900 | -1.91226900 | -3.00231900 |
| H | -9.05541300 | 1.27540100  | -0.11727800 |
| C | 5.58501000  | 0.70013800  | -0.03827900 |
| C | 5.87720000  | 2.03825600  | 0.29399700  |
| C | 6.64930100  | -0.13145200 | -0.41241700 |
| C | 7.17462500  | 2.53151300  | 0.25886700  |
| H | 5.06665500  | 2.68189100  | 0.61544900  |
| C | 7.96757800  | 0.32917400  | -0.45030800 |
| H | 6.43608400  | -1.15242100 | -0.71522600 |
| C | 8.21137200  | 1.66016800  | -0.11362400 |

|   |              |             |             |
|---|--------------|-------------|-------------|
| H | 9.22674200   | 2.03872100  | -0.13961000 |
| C | 9.08440100   | -0.62957200 | -0.87070500 |
| C | 8.81758600   | -1.12721100 | -2.29869300 |
| H | 7.86310900   | -1.65712100 | -2.37358700 |
| H | 8.79028000   | -0.29087400 | -3.00509700 |
| H | 9.60821600   | -1.81660900 | -2.61716400 |
| C | 10.46214000  | 0.03414500  | -0.84511400 |
| H | 10.72387500  | 0.39204200  | 0.15644600  |
| H | 11.22543600  | -0.69100300 | -1.14661700 |
| H | 10.51976100  | 0.88030800  | -1.53808900 |
| C | 9.11187800   | -1.82807900 | 0.08904400  |
| H | 9.30089700   | -1.50164600 | 1.11725500  |
| H | 8.16436600   | -2.37571500 | 0.08165200  |
| H | 9.90440000   | -2.52937900 | -0.19688500 |
| C | 7.51282600   | 3.97906700  | 0.62192100  |
| C | 8.48248300   | 3.99269300  | 1.81270100  |
| H | 9.41478400   | 3.46715700  | 1.58422500  |
| H | 8.73871500   | 5.02313700  | 2.08517000  |
| H | 8.03344900   | 3.51104900  | 2.68778100  |
| C | 6.27349900   | 4.78929500  | 1.00469800  |
| H | 5.54958900   | 4.83742400  | 0.18410200  |
| H | 5.76967600   | 4.37348500  | 1.88376800  |
| H | 6.56574900   | 5.81642600  | 1.24748700  |
| C | 8.17788100   | 4.66029500  | -0.58330500 |
| H | 8.43277300   | 5.69889700  | -0.34241000 |
| H | 9.09994500   | 4.15159600  | -0.88086000 |
| H | 7.50644100   | 4.66655800  | -1.44847300 |
| H | -10.32835700 | -0.10185600 | -1.74603100 |
| C | -5.84997700  | 0.39431500  | 1.53543100  |
| C | -6.48561300  | 2.46563600  | 0.35885100  |
| C | -6.40725500  | -0.77294600 | 2.06671700  |
| C | -6.53071300  | 3.06081900  | -0.91098300 |
| C | -5.72702600  | -1.49044200 | 3.04504300  |
| H | -7.36887300  | -1.11952300 | 1.70103400  |
| C | -3.94470600  | 0.12085900  | 2.99860500  |
| C | -6.50201200  | 4.44523200  | -1.03930500 |
| H | -6.59624300  | 2.43414000  | -1.79517700 |
| C | -6.37855300  | 4.67181300  | 1.34737000  |
| C | -4.49373300  | -1.05078500 | 3.51740800  |

|   |             |             |             |
|---|-------------|-------------|-------------|
| H | -6.17187500 | -2.39804700 | 3.44358800  |
| H | -2.97608000 | 0.47052600  | 3.34418400  |
| C | -6.41875100 | 5.26167600  | 0.08516600  |
| H | -6.53712300 | 4.88499000  | -2.03220300 |
| H | -6.32681600 | 5.29330100  | 2.23707300  |
| H | -3.96345900 | -1.61401600 | 4.27918900  |
| H | -6.38967400 | 6.34184600  | -0.01898700 |
| N | -6.50772200 | 1.06704600  | 0.48146100  |
| H | -6.74242900 | -2.27391600 | -2.67286200 |
| C | -4.61022200 | 0.83855200  | 2.01306600  |
| H | -4.15814000 | 1.73134700  | 1.59392800  |
| C | -6.41994300 | 3.29099000  | 1.49057600  |
| H | -6.40029000 | 2.84410100  | 2.47895300  |

**Pt2**

|    |             |             |             |
|----|-------------|-------------|-------------|
| Pt | -0.41226800 | 1.51623200  | -0.47911700 |
| N  | 1.51994500  | 1.00492500  | -0.51005700 |
| N  | -2.42977300 | 1.48125800  | -0.50727900 |
| O  | -0.01413400 | 3.49382700  | -0.13635400 |
| C  | 1.16403200  | 4.02466700  | -0.23800400 |
| C  | 1.18420500  | 5.44730300  | -0.18426200 |
| H  | 0.22786300  | 5.92844800  | -0.00767400 |
| C  | 2.33575700  | 6.17448400  | -0.38663900 |
| H  | 2.31513900  | 7.25925700  | -0.35891400 |
| C  | 3.52122700  | 5.48868800  | -0.65733200 |
| H  | 4.43817000  | 6.03166400  | -0.86254200 |
| C  | 3.53691400  | 4.09598800  | -0.67230100 |
| C  | 2.40612700  | 3.30945300  | -0.42059700 |
| C  | 2.58341300  | 1.83934600  | -0.36337000 |
| C  | 3.85550900  | 1.29395700  | -0.17812200 |
| C  | 4.08874200  | -0.08072100 | -0.24046700 |
| C  | 2.98231600  | -0.90541200 | -0.49652000 |
| H  | 3.09680300  | -1.98245300 | -0.54426500 |
| C  | 1.72052800  | -0.36335000 | -0.60592300 |
| C  | 0.48278300  | -1.13581000 | -0.77903600 |
| C  | 0.31709300  | -2.51142700 | -0.92998200 |
| C  | -0.98522400 | -3.02689100 | -1.03963300 |
| H  | -1.11299000 | -4.09903400 | -1.15825500 |
| C  | -2.12686200 | -2.22047700 | -0.98776900 |

|   |             |             |             |
|---|-------------|-------------|-------------|
| C | -1.97724700 | -0.83965000 | -0.83271400 |
| C | -0.66788200 | -0.33873000 | -0.74626000 |
| C | -2.97909100 | 0.21007100  | -0.69231800 |
| C | -4.34093300 | 0.02014100  | -0.69850700 |
| H | -4.70869400 | -0.98255200 | -0.88034900 |
| C | -5.23970100 | 1.08744100  | -0.49788300 |
| C | -4.65099600 | 2.37067000  | -0.34048800 |
| H | -5.26834300 | 3.24547900  | -0.16665100 |
| C | -3.28696300 | 2.51932200  | -0.34592100 |
| H | -2.82265500 | 3.48917100  | -0.20313700 |
| H | 4.69252300  | 1.95274700  | 0.00770200  |
| H | 4.47478000  | 3.61065100  | -0.91373800 |
| H | 1.16448500  | -3.19101600 | -0.95990000 |
| H | -3.10864200 | -2.68196200 | -1.05267800 |
| C | -6.68567600 | 0.89862300  | -0.44839200 |
| C | -7.54935200 | 1.88961800  | -0.95635100 |
| C | -7.29807400 | -0.24993900 | 0.11494600  |
| C | -8.92701000 | 1.73457400  | -0.95414600 |
| C | -8.68184400 | -0.40060300 | 0.11651200  |
| C | -9.50555800 | 0.57915800  | -0.42800800 |
| H | -9.55422400 | 2.51403000  | -1.37751100 |
| H | -9.10225400 | -1.29106000 | 0.57500300  |
| C | 5.43620100  | -0.63907500 | -0.04570100 |
| C | 5.82631600  | -1.80058300 | -0.73105300 |
| C | 6.34424200  | -0.02576400 | 0.81876500  |
| C | 7.09536200  | -2.34256300 | -0.56348800 |
| H | 5.12806200  | -2.25559800 | -1.42445400 |
| C | 7.63019500  | -0.54111500 | 1.00956000  |
| H | 6.02915400  | 0.85066200  | 1.37797700  |
| C | 7.98121700  | -1.69508900 | 0.31136100  |
| H | 8.97282000  | -2.11255200 | 0.44532600  |
| C | 8.58705000  | 0.16460200  | 1.97205800  |
| C | 7.97138200  | 0.17891400  | 3.37878800  |
| H | 7.01223900  | 0.70541100  | 3.39887300  |
| H | 7.80087200  | -0.83993600 | 3.74202700  |
| H | 8.64298000  | 0.68329700  | 4.08277000  |
| C | 9.94851500  | -0.52749900 | 2.04991500  |
| H | 10.45251200 | -0.54790400 | 1.07764100  |
| H | 10.59657700 | 0.01565200  | 2.74546900  |

|   |              |             |             |
|---|--------------|-------------|-------------|
| H | 9.86294200   | -1.55642200 | 2.41526300  |
| C | 8.80724700   | 1.60837600  | 1.49697400  |
| H | 9.24559900   | 1.62839300  | 0.49355900  |
| H | 7.87039800   | 2.17336400  | 1.46458300  |
| H | 9.48829200   | 2.13315300  | 2.17646000  |
| C | 7.55610200   | -3.60190100 | -1.29888700 |
| C | 8.77864100   | -3.26624600 | -2.16552700 |
| H | 9.61443800   | -2.89449700 | -1.56478000 |
| H | 9.12339700   | -4.15938400 | -2.69887900 |
| H | 8.53356600   | -2.50005700 | -2.90857700 |
| C | 6.46674900   | -4.17509300 | -2.20625500 |
| H | 5.57242300   | -4.45828600 | -1.64070700 |
| H | 6.17065300   | -3.46701800 | -2.98758200 |
| H | 6.84007400   | -5.07614400 | -2.70372800 |
| C | 7.93965300   | -4.67537700 | -0.26971800 |
| H | 8.27715600   | -5.58559800 | -0.77821000 |
| H | 8.74954800   | -4.34107200 | 0.38588800  |
| H | 7.08401500   | -4.93613200 | 0.36208200  |
| H | -10.58323100 | 0.44996900  | -0.42461500 |
| H | -7.11281300  | 2.77734900  | -1.40459500 |
| C | -6.29740800  | -2.53145900 | 0.21468300  |
| C | -5.68190100  | -1.07772800 | 1.82458700  |
| C | -6.85605100  | -3.13030200 | -0.91392400 |
| C | -5.31386700  | -3.18440300 | 0.99839500  |
| C | -5.53569800  | 0.04564100  | 2.63611600  |
| C | -4.92040100  | -2.25177500 | 2.02900600  |
| C | -6.42660400  | -4.41133900 | -1.23990600 |
| H | -7.59460000  | -2.61008600 | -1.51541500 |
| C | -4.90213300  | -4.47255900 | 0.64805100  |
| C | -4.60064600  | -0.02287200 | 3.65999900  |
| H | -6.12083500  | 0.94230300  | 2.46210800  |
| C | -3.98852300  | -2.29525500 | 3.06916800  |
| C | -5.46341200  | -5.07956900 | -0.46874700 |
| H | -6.84495000  | -4.90254200 | -2.11380100 |
| H | -4.14633700  | -4.98608600 | 1.23597800  |
| C | -3.83274900  | -1.17785400 | 3.87709800  |
| H | -4.45749500  | 0.84040500  | 4.30353800  |
| H | -3.39040100  | -3.18673200 | 3.23574100  |
| H | -5.15182400  | -6.08039000 | -0.75268900 |

|   |             |             |            |
|---|-------------|-------------|------------|
| H | -3.10670500 | -1.19253800 | 4.68435700 |
| N | -6.51513700 | -1.26142400 | 0.72908900 |

**Pt3**

|    |             |             |             |
|----|-------------|-------------|-------------|
| Pt | -0.47739700 | 1.37020900  | -0.55365800 |
| N  | 1.46088500  | 0.95959700  | -0.59355200 |
| N  | -2.50863100 | 1.22738600  | -0.62275900 |
| O  | -0.14688100 | 3.36288400  | -0.05077500 |
| C  | 0.99579400  | 3.94747300  | -0.13342700 |
| C  | 0.95699200  | 5.36978300  | 0.01374500  |
| H  | -0.01636500 | 5.79344300  | 0.23885600  |
| C  | 2.07046300  | 6.15679700  | -0.16393100 |
| H  | 2.01213700  | 7.23559300  | -0.06544100 |
| C  | 3.27284700  | 5.53084100  | -0.51178900 |
| H  | 4.16078500  | 6.12459200  | -0.70602900 |
| C  | 3.35160900  | 4.14275200  | -0.62621500 |
| C  | 2.27083900  | 3.28740600  | -0.38081200 |
| C  | 2.50382500  | 1.83381600  | -0.37714500 |
| C  | 3.78509900  | 1.33704900  | -0.18491700 |
| C  | 4.09688900  | -0.02884500 | -0.30266800 |
| C  | 3.02191300  | -0.88242700 | -0.64760600 |
| H  | 3.18204700  | -1.94995500 | -0.75518200 |
| C  | 1.74413100  | -0.40148100 | -0.76874500 |
| C  | 0.54931700  | -1.21442800 | -1.02203500 |
| C  | 0.43389600  | -2.58657600 | -1.25791000 |
| C  | -0.83570500 | -3.15660900 | -1.42112200 |
| H  | -0.91075700 | -4.22576400 | -1.59718300 |
| C  | -2.01204000 | -2.40297900 | -1.34639100 |
| C  | -1.91030100 | -1.02899100 | -1.11525900 |
| C  | -0.63880000 | -0.47380400 | -0.96656800 |
| C  | -2.97015300 | -0.03878800 | -0.91811600 |
| C  | -4.32779800 | -0.29995800 | -0.95220400 |
| H  | -4.65873100 | -1.30294400 | -1.19605900 |
| C  | -5.25979500 | 0.69181000  | -0.62912300 |
| C  | -4.76542500 | 1.97318600  | -0.35290800 |
| H  | -5.43226600 | 2.78469700  | -0.08452400 |
| C  | -3.40124200 | 2.19783800  | -0.36820500 |
| H  | -2.98370200 | 3.17347000  | -0.14413800 |
| H  | 4.58308000  | 2.03197000  | 0.04373400  |



|   |             |             |             |
|---|-------------|-------------|-------------|
| H | 4.29968100  | 3.71596900  | -0.93033100 |
| H | 1.31223200  | -3.22535300 | -1.30908400 |
| H | -2.97478900 | -2.89683600 | -1.44552700 |
| C | -6.69272100 | 0.35135900  | -0.48956200 |
| C | -7.70170400 | 1.03586800  | -1.19505100 |
| C | -7.05837400 | -0.70139800 | 0.37606600  |
| C | -9.02980100 | 0.63423500  | -1.02958800 |
| C | -8.38818900 | -1.07888200 | 0.53087800  |
| C | -9.37680400 | -0.41100200 | -0.18160400 |
| H | -9.80465600 | 1.15066400  | -1.59020500 |
| H | -8.62958900 | -1.88442700 | 1.21718400  |
| C | 5.45252600  | -0.53117200 | -0.08844400 |
| C | 5.88846900  | -1.71617700 | -0.71398200 |
| C | 6.35781500  | 0.14873200  | 0.73710700  |
| C | 7.17406500  | -2.20718200 | -0.52920300 |
| H | 5.20681800  | -2.23194100 | -1.38029800 |
| C | 7.66126200  | -0.31193000 | 0.93831400  |
| H | 6.02290100  | 1.03879700  | 1.26187900  |
| C | 8.05089400  | -1.48897300 | 0.30022900  |
| H | 9.05690200  | -1.86560700 | 0.44561700  |
| C | 8.60015900  | 0.47481700  | 1.85624300  |
| C | 8.00129900  | 0.52883100  | 3.26919000  |
| H | 7.02062000  | 1.01428800  | 3.27669800  |
| H | 7.87708100  | -0.47881600 | 3.67960700  |
| H | 8.65847000  | 1.09221100  | 3.94188900  |
| C | 9.98972100  | -0.15750900 | 1.94857100  |
| H | 10.48119400 | -0.20586200 | 0.97090500  |
| H | 10.62439300 | 0.44389800  | 2.60802100  |
| H | 9.95014300  | -1.17032400 | 2.36348400  |
| C | 8.75858000  | 1.90368100  | 1.31623800  |
| H | 9.18359100  | 1.89571100  | 0.30687700  |
| H | 7.79947300  | 2.42880600  | 1.27046900  |
| H | 9.42632700  | 2.48510200  | 1.96254000  |
| C | 7.66797900  | -3.48921500 | -1.20292900 |
| C | 8.87451100  | -3.16419000 | -2.09561700 |
| H | 9.70134800  | -2.73462400 | -1.52166900 |
| H | 9.24442100  | -4.07313200 | -2.58415800 |
| H | 8.60099900  | -2.44598300 | -2.87583700 |
| C | 6.59244400  | -4.14320500 | -2.07152000 |

|   |              |             |             |
|---|--------------|-------------|-------------|
| H | 5.71025700   | -4.42248100 | -1.48542000 |
| H | 6.26999300   | -3.48577300 | -2.88592800 |
| H | 6.99067400   | -5.05751500 | -2.52406500 |
| C | 8.09052500   | -4.49654800 | -0.12328200 |
| H | 8.45201700   | -5.42254200 | -0.58538100 |
| H | 8.89348200   | -4.10389300 | 0.50803400  |
| H | 7.24690700   | -4.74812500 | 0.52821300  |
| H | -10.41721100 | -0.70141400 | -0.07137700 |
| C | -5.58412700  | -2.66255900 | 0.78373800  |
| C | -5.21205100  | -0.83285100 | 2.05194800  |
| C | -6.06736300  | -3.56696200 | -0.16015400 |
| C | -4.41482800  | -2.92116600 | 1.53875200  |
| C | -5.28088000  | 0.42202800  | 2.65200100  |
| C | -4.17695300  | -1.74879200 | 2.34970100  |
| C | -5.36640800  | -4.75726000 | -0.32531900 |
| H | -6.95588400  | -3.34790000 | -0.74397900 |
| C | -3.73143900  | -4.12426300 | 1.35313600  |
| C | -4.27651700  | 0.75731500  | 3.55141500  |
| H | -6.08428000  | 1.11252600  | 2.41670700  |
| C | -3.18001800  | -1.38762300 | 3.25858600  |
| C | -4.21380700  | -5.03747200 | 0.42337000  |
| H | -5.72120200  | -5.48282700 | -1.05173900 |
| H | -2.82620400  | -4.33380900 | 1.91559800  |
| C | -3.23427300  | -0.13282600 | 3.85079400  |
| H | -4.29832500  | 1.73221800  | 4.02993200  |
| H | -2.37017700  | -2.07374500 | 3.48906900  |
| H | -3.68991800  | -5.97577700 | 0.26765800  |
| H | -2.46125600  | 0.16571300  | 4.55221000  |
| N | -6.06091500  | -1.39779700 | 1.10704900  |
| C | -7.38190000  | 2.15300100  | -2.14814400 |
| H | -7.26807600  | 3.11038200  | -1.62665000 |
| H | -6.45153600  | 1.97010600  | -2.69248200 |
| H | -8.18708000  | 2.27608500  | -2.87728100 |

#### **Pt4**

|    |             |             |             |
|----|-------------|-------------|-------------|
| Pt | 0.37392900  | -0.92938800 | -0.06931500 |
| N  | 2.36102900  | -0.81722100 | 0.14031700  |
| N  | -1.60082300 | -0.51321800 | -0.11052400 |
| O  | 0.42999400  | -2.82848600 | -0.81791700 |

|   |             |             |             |
|---|-------------|-------------|-------------|
| C | 1.48274500  | -3.58571100 | -0.79680400 |
| C | 1.24762600  | -4.94158800 | -1.16009200 |
| H | 0.23443700  | -5.18092800 | -1.46585500 |
| C | 2.23042800  | -5.90345000 | -1.08810700 |
| H | 2.01413100  | -6.93340100 | -1.35342800 |
| C | 3.49908900  | -5.53200100 | -0.64020000 |
| H | 4.28562200  | -6.27205300 | -0.53352100 |
| C | 3.76625400  | -4.20332400 | -0.31952400 |
| C | 2.81731500  | -3.17874100 | -0.42334000 |
| C | 3.26267900  | -1.79197800 | -0.14584400 |
| C | 4.62388500  | -1.47611300 | -0.15597000 |
| C | 5.09397000  | -0.21612400 | 0.21556600  |
| C | 4.13838000  | 0.73689200  | 0.59873300  |
| H | 4.43922000  | 1.73894300  | 0.88326900  |
| C | 2.79518500  | 0.43645500  | 0.53717400  |
| C | 1.70747500  | 1.38166900  | 0.82493300  |
| C | 1.78369900  | 2.70463400  | 1.25490800  |
| C | 0.59048500  | 3.43012900  | 1.41910700  |
| H | 0.65043000  | 4.46257300  | 1.75135800  |
| C | -0.67081100 | 2.88636800  | 1.15726900  |
| C | -0.76336100 | 1.55997800  | 0.72428700  |
| C | 0.43801700  | 0.84372400  | 0.58205900  |
| C | -1.92262200 | 0.77264800  | 0.33041900  |
| C | -3.22700100 | 1.20878300  | 0.34052000  |
| H | -3.42697900 | 2.20238100  | 0.72532200  |
| C | -4.28089200 | 0.39565200  | -0.11305500 |
| C | -3.92570400 | -0.90832300 | -0.54934300 |
| H | -4.67403500 | -1.59521600 | -0.92674500 |
| C | -2.61379900 | -1.30930000 | -0.53031700 |
| H | -2.32200100 | -2.29790100 | -0.86741200 |
| H | 5.34120700  | -2.23074200 | -0.44756500 |
| H | 4.75826900  | -3.97033300 | 0.04774700  |
| H | 2.73574800  | 3.18761400  | 1.45741900  |
| H | -1.55400700 | 3.50842900  | 1.27553500  |
| C | -5.65376000 | 0.89286700  | -0.14680100 |
| C | -6.75007700 | 0.11127100  | 0.29086600  |
| C | -5.96234200 | 2.19022900  | -0.63100100 |
| C | -8.05499900 | 0.59356800  | 0.25007400  |
| C | -7.26831600 | 2.66500100  | -0.67217100 |

|   |             |             |             |
|---|-------------|-------------|-------------|
| C | -8.32278300 | 1.87053700  | -0.23153600 |
| H | -8.85310600 | -0.04025500 | 0.62469000  |
| H | -7.44569900 | 3.65632800  | -1.07806600 |
| C | 6.53208000  | 0.09787400  | 0.20497000  |
| C | 7.07261200  | 0.97200800  | 1.16107200  |
| C | 7.37635600  | -0.46896400 | -0.75039100 |
| C | 8.42970600  | 1.27407100  | 1.17228600  |
| H | 6.41628800  | 1.38725700  | 1.91780900  |
| C | 8.74633800  | -0.18897600 | -0.76867800 |
| H | 6.94957500  | -1.11459000 | -1.51263500 |
| C | 9.24738300  | 0.68041700  | 0.19840800  |
| H | 10.30688000 | 0.91026900  | 0.20213000  |
| C | 9.62960000  | -0.82760800 | -1.84180200 |
| C | 9.14879100  | -0.37361300 | -3.22785000 |
| H | 8.11111500  | -0.66605900 | -3.41571600 |
| H | 9.21204100  | 0.71508400  | -3.32697500 |
| H | 9.76882900  | -0.82339800 | -4.01163200 |
| C | 11.10059300 | -0.43782000 | -1.69097800 |
| H | 11.50885000 | -0.75204100 | -0.72435800 |
| H | 11.69115800 | -0.92622200 | -2.47294500 |
| H | 11.24984400 | 0.64236400  | -1.79327000 |
| C | 9.52390100  | -2.35636000 | -1.74094600 |
| H | 9.86015500  | -2.70901700 | -0.76014300 |
| H | 8.49662600  | -2.70408700 | -1.88817700 |
| H | 10.14789500 | -2.83210000 | -2.50586400 |
| C | 9.05577800  | 2.21244800  | 2.20524100  |
| C | 10.11379600 | 1.44572500  | 3.01216600  |
| H | 10.91216600 | 1.05799200  | 2.37197400  |
| H | 10.57472400 | 2.10418500  | 3.75713200  |
| H | 9.66534600  | 0.59724100  | 3.53958500  |
| C | 8.02084900  | 2.77370100  | 3.18120800  |
| H | 7.24707500  | 3.35350700  | 2.66646400  |
| H | 7.53125600  | 1.98179300  | 3.75799200  |
| H | 8.51345900  | 3.44275200  | 3.89423100  |
| C | 9.72274700  | 3.39056200  | 1.47989600  |
| H | 10.17709300 | 4.07480100  | 2.20536200  |
| H | 10.51195900 | 3.05705200  | 0.79911200  |
| H | 8.99063400  | 3.95492600  | 0.89272300  |
| H | -9.34131600 | 2.24293800  | -0.26249400 |

|   |             |             |             |
|---|-------------|-------------|-------------|
| C | -4.41498100 | 4.13754200  | -0.49353100 |
| C | -4.11471200 | 2.71693000  | -2.22014900 |
| C | -4.85363700 | 4.75822200  | 0.67514900  |
| C | -3.25612700 | 4.57256200  | -1.18246000 |
| C | -4.22281800 | 1.66859500  | -3.13099800 |
| C | -3.06574600 | 3.66223600  | -2.28825100 |
| C | -4.11884800 | 5.84356100  | 1.14017900  |
| H | -5.73373800 | 4.40279800  | 1.20186900  |
| C | -2.53916500 | 5.66679500  | -0.69444700 |
| C | -3.24920400 | 1.57567800  | -4.11670200 |
| H | -5.02826800 | 0.94522100  | -3.06102900 |
| C | -2.10218800 | 3.54906000  | -3.29335400 |
| C | -2.97644100 | 6.29765100  | 0.46433200  |
| H | -4.43769300 | 6.34765900  | 2.04805400  |
| H | -1.64456400 | 6.00943900  | -1.20683900 |
| C | -2.19868400 | 2.50264000  | -4.20006500 |
| H | -3.30055100 | 0.76252600  | -4.83500800 |
| H | -1.28583100 | 4.26302700  | -3.35648900 |
| H | -2.42705900 | 7.14888600  | 0.85531100  |
| H | -1.45231600 | 2.39511300  | -4.98131100 |
| N | -4.92934100 | 3.02033200  | -1.13614900 |
| N | -6.52751900 | -1.17683800 | 0.83400800  |
| C | -5.78839400 | -1.46062300 | 1.97471900  |
| C | -6.95830200 | -2.37042100 | 0.27282200  |
| C | -5.16595100 | -0.58252300 | 2.85965300  |
| C | -5.73891000 | -2.86270000 | 2.15327300  |
| C | -7.69668000 | -2.57907600 | -0.89115100 |
| C | -6.48867200 | -3.44665200 | 1.06461800  |
| C | -4.47180000 | -1.13561100 | 3.92757500  |
| H | -5.21319600 | 0.49087500  | 2.71176000  |
| C | -5.03880200 | -3.39227300 | 3.24005000  |
| C | -7.97723100 | -3.89356400 | -1.24567100 |
| H | -8.03895300 | -1.74505600 | -1.49556300 |
| C | -6.78701300 | -4.75681400 | 0.68484400  |
| C | -4.40534400 | -2.52427600 | 4.11870900  |
| H | -3.96737600 | -0.47619700 | 4.62794800  |
| H | -4.98939900 | -4.46697000 | 3.39192700  |
| C | -7.53254800 | -4.97235200 | -0.46745100 |
| H | -8.55254000 | -4.08673600 | -2.14667100 |

|   |             |             |             |
|---|-------------|-------------|-------------|
| H | -6.43564500 | -5.59494700 | 1.28035900  |
| H | -3.85081700 | -2.92119800 | 4.96371700  |
| H | -7.77136500 | -5.98656400 | -0.77335500 |
